# Supplementary material for: Cs2CO3 catalyzed direct aza-Michael addition of azoles to α,β-unsaturated malonates
Source: Royal Society of Chemistry journal article supplement (doi:10.1039/d2ra02314h), 2022-01-01

## Cs<sub>2</sub>CO<sub>3</sub> catalyzed direct aza-Michael addition of azoles to $\alpha,\beta$ -unsaturated malonates

Zi-Yu Jiang, Zhe-Yao Huang, Hong Yang, Lin Zhou,\* Qing-Han Li and Zhi-Gang Zhao

*Key Laboratory of General Chemistry of the National Ethnic Affairs Commission, College of  
Chemistry and Environment, Southwest Minzu University, Chengdu 610041, P. R. China*

[zhoulin@swun.edu.cn](mailto:zhoulin@swun.edu.cn)

### Supporting Information

|                                                                                               |    |
|-----------------------------------------------------------------------------------------------|----|
| 1. General.....                                                                               | 2  |
| 2. Typical procedure for the direct aza-Michael additions .....                               | 2  |
| 3. Extra condition optimizations for the direct aza-Michael addition .....                    | 3  |
| 4. Characterization of the aza-Michael products <b>3</b> .....                                | 5  |
| 5. Copy of <sup>1</sup> H NMR and <sup>13</sup> C NMR spectra for the products <b>3</b> ..... | 15 |

## 1. General

$^1\text{H}$  NMR and  $^{13}\text{C}$  NMR spectra were recorded on a Varian 400 MHz spectrometer. Chemical shifts were reported in ppm from tetramethylsilane with the solvent resonance as the internal standard ( $\text{CDCl}_3$ ;  $\delta = 7.26$ ). Spectra were reported as follows: chemical shift ( $\delta$  ppm), multiplicity (s = singlet, d = doublet, t = triplet, q = quartet, p = quintet, m = multiplet, w = wide), coupling constants (Hz) and integration.  $^{13}\text{C}$  NMR spectra were collected on commercial instruments (100 MHz) with complete proton decoupling. Chemical shifts were reported in ppm from the tetramethylsilane with the solvent resonance as internal standard ( $\text{CDCl}_3$ ;  $\delta = 77.0$ ). ESI-HRMS spectra were recorded on a commercial apparatus and methanol or acetonitrile was used to dissolve the sample. Reagents obtained from commercial sources were used without further purification.  $\text{CH}_2\text{Cl}_2$  were distilled over  $\text{CaH}_2$  before use. The THF and other solvents were distilled from sodium benzophenone ketyl before use. Purifications of the products were carried out by flash chromatography.

## 2. Typical procedure for the direct aza-Michael additions

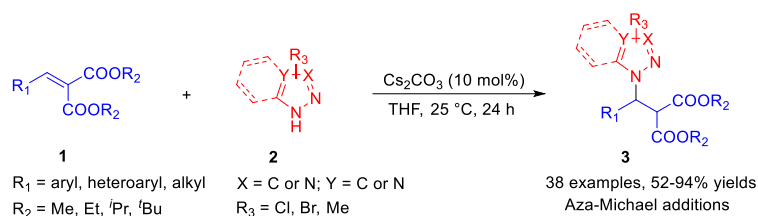

The reactions were performed with  $\alpha,\beta$ -unsaturated malonates **1** (0.50 mmol), azoles **2** (0.75 mmol) and  $\text{Cs}_2\text{CO}_3$  (0.05 mmol) in THF (0.5 mL) at 25  $^\circ\text{C}$ . The reaction mixtures were stirred at 25  $^\circ\text{C}$  for 24 h. Then, the solvents were removed under reduced pressure, and the residues were purified by flash chromatography on silica gel by gradient elution with PE/EA = 8/1 to 3/1 to afford the azole derivatives **3**.

### 3. Extra condition optimizations for the direct aza-Michael addition

**Table 1:** Exploring the efficiency of base on the direct aza-Michael addition<sup>[a]</sup>.

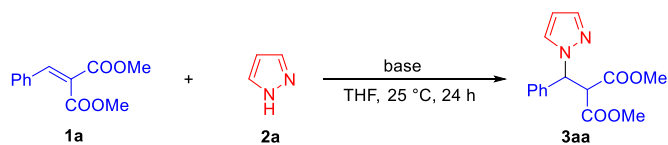

| Entry    | Base                                              | Yield [%] <sup>[b]</sup> |
|----------|---------------------------------------------------|--------------------------|
| 1        | -                                                 | 0                        |
| 2        | Et <sub>3</sub> N                                 | Trace                    |
| 3        | DBU                                               | 31                       |
| 4        | LiOH•H <sub>2</sub> O                             | 60                       |
| 5        | K <sub>3</sub> PO <sub>4</sub> •7H <sub>2</sub> O | 58                       |
| <b>6</b> | <b>Cs<sub>2</sub>CO<sub>3</sub></b>               | <b>69</b>                |
| 7        | K <sub>2</sub> CO <sub>3</sub>                    | 53                       |

[a] Unless otherwise noted, the reactions were performed with **1a** (0.20 mmol), **2a** (0.20 mmol), base (100 mol %) in THF (1.0 mL) at 25 °C for 24 h. [b] Isolated yield.

**Table 2:** Exploring the efficiency of solvent on the direct aza-Michael addition<sup>[a]</sup>.

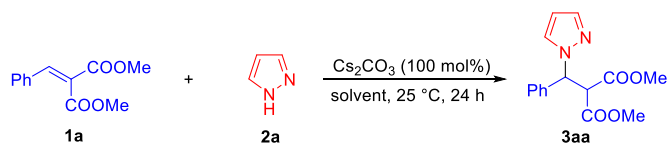

| Entry    | Solvent                         | Yield [%] <sup>[b]</sup> |
|----------|---------------------------------|--------------------------|
| <b>1</b> | <b>THF</b>                      | <b>69</b>                |
| 2        | CH <sub>3</sub> OH              | -                        |
| 3        | PhCH <sub>3</sub>               | 62                       |
| 4        | EtOAc                           | 48                       |
| 5        | CH <sub>2</sub> Cl <sub>2</sub> | 61                       |

[a] Unless otherwise noted, the reactions were performed with **1a** (0.20 mmol), **2a** (0.20 mmol), Cs<sub>2</sub>CO<sub>3</sub> (100 mol %) in solvent (1.0 mL) at 25 °C for 24 h. [b] Isolated yield.

**Table 3:** Exploring the efficiency of temperature on the direct aza-Michael addition<sup>[a]</sup>.

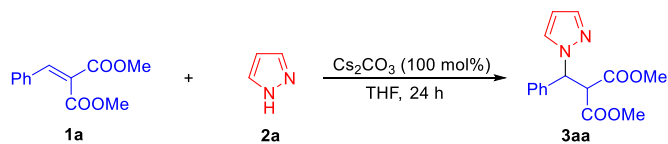

| Entry    | T (°C)    | Yield [%] <sup>[b]</sup> |
|----------|-----------|--------------------------|
| 1        | 0         | 50                       |
| <b>2</b> | <b>25</b> | <b>69</b>                |
| 3        | 30        | 68                       |
| 4        | 40        | 67                       |
| 5        | 50        | 66                       |

[a] Unless otherwise noted, the reactions were performed with **1a** (0.20 mmol), **2a** (0.20 mmol), Cs<sub>2</sub>CO<sub>3</sub> (100 mol %) in THF (1.0 mL) at the indicated temperature for 24 h. [b] Isolated yield.

**Table 4:** Exploring the efficiency of the ratio of substrates on the direct aza-Michael addition<sup>[a]</sup>.

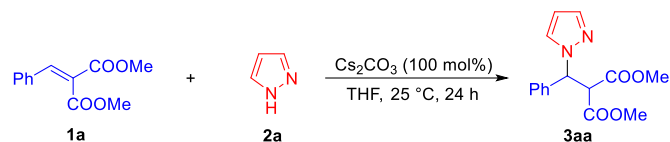

| Entry    | Ratio ( <b>1a/2a</b> ) | Yield [%] <sup>[b]</sup> |
|----------|------------------------|--------------------------|
| 1        | 1.0/3.0                | 80                       |
| 2        | 1.0/2.0                | 81                       |
| <b>3</b> | <b>1.0/1.5</b>         | <b>80</b>                |
| 4        | 1.0/1.0                | 69                       |
| 5        | 1.5/1.0                | 69                       |
| 6        | 2.0/1.0                | 70                       |
| 7        | 3.0/1.0                | 72                       |

[a] Unless otherwise noted, the reactions were performed with **1a**, **2a**, Cs<sub>2</sub>CO<sub>3</sub> (100 mol %) in THF (1.0 mL) at 25 °C for 24 h. [b] Isolated yield.

**Table 5:** Exploring the efficiency of catalyst loading on the direct aza-Michael addition<sup>[a]</sup>.

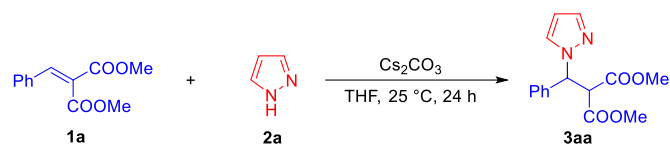

| Entry    | Cs <sub>2</sub> CO <sub>3</sub> (x mol%) | Yield [%] <sup>[b]</sup> |
|----------|------------------------------------------|--------------------------|
| 1        | 0                                        | -                        |
| 2        | 1                                        | 55                       |
| 3        | 5                                        | 62                       |
| <b>4</b> | <b>10</b>                                | <b>79</b>                |
| 5        | 20                                       | 80                       |
| 6        | 50                                       | 80                       |
| 7        | 100                                      | 80                       |

[a] Unless otherwise noted, the reactions were performed with **1a** (0.20 mmol), **2a** (0.30 mmol), Cs<sub>2</sub>CO<sub>3</sub> (x mol %) in THF (1.0 mL) at 25 °C for 24 h. [b] Isolated yield.

## 4. Characterization of the aza-Michael products 3

### Dimethyl 2-(phenyl(1*H*-pyrazol-1-yl)methyl)malonate 3aa:

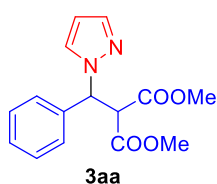

Prepared according to **general procedure**. 83% yield. White solid, m.p.: 98 – 101 °C. <sup>1</sup>H NMR (400 MHz, CDCl<sub>3</sub>): δ = 7.50 (s, 1H), 7.44 (s, 1H), 7.43 (d, *J* = 6.4 Hz, 2H), 7.33 – 7.24 (m, 3H), 6.18 (s, 1H), 5.93 (d, *J* = 11.2 Hz, 1H), 4.84 (d, *J* = 11.2 Hz, 1H), 3.62 (s, 3H), 3.48 (s, 3H). <sup>13</sup>C NMR (100 MHz, CDCl<sub>3</sub>) δ = 166.99, 166.71, 139.59, 137.08, 129.81, 128.71, 128.67, 127.59, 105.84, 64.10, 56.97, 52.92, 52.74 ppm. IR (KBr, thin film):  $\nu_{\max}$  = 3449, 3151, 3058, 3023, 2970, 2858, 1982, 1734, 1613, 1508, 1441, 1203, 1093, 1053, 1013, 971, 936, 885, 817, 767, 707, 673, 636, 584 cm<sup>-1</sup>. ES-HRMS Calcd for C<sub>15</sub>H<sub>16</sub>N<sub>2</sub>O<sub>4</sub>[M + H]<sup>+</sup> m/z 289.1183, Found: m/z 289.1179.

### Diethyl 2-(phenyl(1*H*-pyrazol-1-yl)methyl)malonate 3ba:

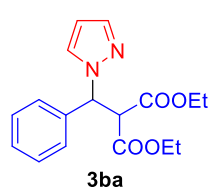

Prepared according to **general procedure**. 68% yield. White solid, m.p.: 127 – 130 °C. <sup>1</sup>H NMR (400 MHz, CDCl<sub>3</sub>): δ = 7.49 (s, 1H), 7.45 (d, *J* = 6.4 Hz, 2H), 7.44 (s, 1H), 7.31 – 7.25 (m, 3H), 6.18 (s, 1H), 5.91 (d, *J* = 11.2 Hz, 1H), 4.79 (d, *J* = 11.2 Hz, 1H), 4.11 – 4.06 (m, 2H), 3.98 – 3.92 (m, 2H), 1.12 (t, *J* = 7.2 Hz, 3H), 0.96 (t, *J* = 7.2 Hz, 3H). <sup>13</sup>C NMR (100 MHz, CDCl<sub>3</sub>) δ = 166.57, 166.33, 139.51, 137.12, 129.72, 128.63, 128.58, 127.76, 105.67, 64.19, 61.83, 61.73, 57.30, 13.83, 13.65 ppm. IR (KBr, thin film):  $\nu_{\max}$  = 3476, 2968, 1753, 1641, 1528, 1443, 1269, 1153, 1029, 931, 757, 702, 670, 634, 587 cm<sup>-1</sup>. ES-HRMS Calcd for C<sub>17</sub>H<sub>20</sub>N<sub>2</sub>O<sub>4</sub>[M + Na]<sup>+</sup> m/z 339.1315, Found: m/z 339.1313.

### Diisopropyl 2-(phenyl(1*H*-pyrazol-1-yl)methyl)malonate 3ca:

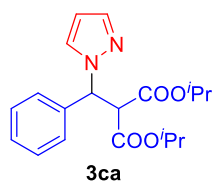

Prepared according to **general procedure**. 67% yield. White solid, m.p.: 73 – 76 °C. <sup>1</sup>H NMR (400 MHz, CDCl<sub>3</sub>): δ = 7.52 – 7.43 (m, 4H), 7.32 – 7.24 (m, 3H), 6.17 (s, 1H), 5.89 (d, *J* = 11.6 Hz, 1H), 4.92 (sep, *J* = 6.4 Hz, 1H), 4.80 (sep, *J* = 6.4 Hz, 1H), 4.74 (d, *J* = 11.6 Hz, 1H), 1.12 (d, *J* = 6.4 Hz, 3H), 1.11 (d, *J* = 6.4 Hz, 3H), 1.06 (d, *J* = 6.4 Hz, 3H), 0.91 (d, *J* = 6.4 Hz, 3H). <sup>13</sup>C NMR (100 MHz, CDCl<sub>3</sub>) δ = 166.12, 165.85, 139.45, 137.18, 129.62, 128.56, 128.52, 127.88, 105.54, 69.33, 64.19, 57.63, 21.36, 21.33, 21.26, 21.14 ppm. IR (KBr, thin film):  $\nu_{\max}$  = 3422, 2993, 2946, 1755, 1650, 1512, 1465, 1387, 1305, 1185, 1101, 1051, 963, 910, 828, 764, 705, 631, 570 cm<sup>-1</sup>. ES-HRMS Calcd for C<sub>19</sub>H<sub>24</sub>N<sub>2</sub>O<sub>4</sub>[M + H]<sup>+</sup> m/z 345.1809, Found: m/z 345.1804.

### Di-*tert*-butyl 2-(phenyl(1*H*-pyrazol-1-yl)methyl)malonate 3da:

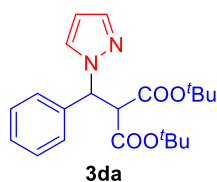

Prepared according to **general procedure**. 69% yield. White solid, m.p.: 118 – 121 °C. <sup>1</sup>H NMR (400 MHz, CDCl<sub>3</sub>): δ = 7.50 – 7.43 (m, 4H), 7.32 – 7.24 (m, 3H), 6.17 (s, 1H), 5.79 (d, *J* = 11.2 Hz, 1H), 4.61 (d, *J* = 11.2 Hz, 1H), 1.32 (s, 9H), 1.19 (s, 9H). <sup>13</sup>C NMR (100 MHz, CDCl<sub>3</sub>) δ = 165.81, 165.55, 139.31, 137.43, 129.52, 128.44, 127.99, 105.41, 82.06, 82.01, 64.30, 58.98, 27.63, 27.44 ppm. IR (KBr, thin film):  $\nu_{\max}$  = 3488, 3127, 3074, 3002, 2949, 1752, 1608, 1463, 1332, 1133, 1045, 963, 923, 860, 759, 704, 629, 596, 523 cm<sup>-1</sup>. ES-HRMS Calcd for C<sub>21</sub>H<sub>28</sub>N<sub>2</sub>O<sub>4</sub>[M + Na]<sup>+</sup> m/z 395.1941, Found: m/z 395.1939.

### Dimethyl 2-((4-fluorophenyl)(1*H*-pyrazol-1-yl)methyl)malonate **3ea**:

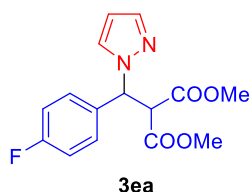

Prepared according to **general procedure**. 84% yield. White solid, m.p.: 113 – 116 °C. <sup>1</sup>H NMR (400 MHz, CDCl<sub>3</sub>): δ = 7.50 (s, 1H), 7.47 – 7.41 (m, 3H), 6.98 (t, *J* = 8.4 Hz, 2H), 6.19 (s, 1H), 5.92 (d, *J* = 11.2 Hz, 1H), 4.79 (d, *J* = 11.2 Hz, 1H), 3.62 (s, 3H), 3.52 (s, 3H). <sup>13</sup>C NMR (100 MHz, CDCl<sub>3</sub>) δ = 166.82, 166.65, 163.93, 161.47, 139.81, 133.00, 132.96, 129.83, 129.58, 129.50, 115.71, 115.50, 105.88, 63.34, 57.06, 52.95, 52.81 ppm. IR (KBr, thin film):  $\nu_{\max}$  = 3456, 3134, 3086, 3032, 2973, 2862, 1770, 1615, 1522, 1442, 1153, 1095, 969, 926, 889, 859, 801, 762, 668, 628, 577 cm<sup>-1</sup>. ES-HRMS Calcd for C<sub>15</sub>H<sub>15</sub>FN<sub>2</sub>O<sub>4</sub>[M + Na]<sup>+</sup> *m/z* 329.0908, Found: *m/z* 329.0906.

### Dimethyl 2-((3-fluorophenyl)(1*H*-pyrazol-1-yl)methyl)malonate **3fa**:

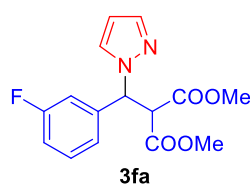

Prepared according to **general procedure**. 73% yield. White solid, m.p.: 139 – 141 °C. <sup>1</sup>H NMR (400 MHz, CDCl<sub>3</sub>): δ = 7.53 (s, 1H), 7.47 (s, 1H), 7.33 – 7.17 (m, 3H), 6.99 (t, *J* = 8.0 Hz, 1H), 6.23 (s, 1H), 5.94 (d, *J* = 11.2 Hz, 1H), 4.82 (d, *J* = 11.2 Hz, 1H), 3.65 (s, 3H), 3.56 (s, 3H). <sup>13</sup>C NMR (100 MHz, CDCl<sub>3</sub>) δ = 166.73, 166.56, 163.83, 161.36, 139.90, 139.48, 139.42, 130.28, 130.19, 129.94, 123.33, 123.30, 115.85, 125.64, 114.85, 114.63, 106.00, 63.45, 56.85, 53.00, 52.87 ppm. IR (KBr, thin film):  $\nu_{\max}$  = 3471, 1655, 1506, 1438, 1059, 1010, 981, 946, 875, 807, 760, 708, 677, 626, 581 cm<sup>-1</sup>. ES-HRMS Calcd for C<sub>15</sub>H<sub>15</sub>FN<sub>2</sub>O<sub>4</sub>[M + H]<sup>+</sup> *m/z* 307.1089, Found: *m/z* 307.1091.

### Dimethyl 2-((2-fluorophenyl)(1*H*-pyrazol-1-yl)methyl)malonate **3ga**:

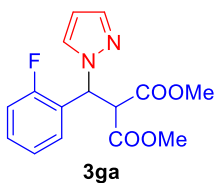

Prepared according to **general procedure**. 66% yield. White solid, m.p.: 115 – 117 °C. <sup>1</sup>H NMR (400 MHz, CDCl<sub>3</sub>): δ = 7.62 (t, *J* = 7.6 Hz, 1H), 7.50 (s, 1H), 7.47 (s, 1H), 7.30 – 7.20 (m, 1H), 7.10 (t, *J* = 7.6 Hz, 1H), 7.02 (t, *J* = 9.2 Hz, 1H), 6.36 (d, *J* = 11.2 Hz, 1H), 6.16 (s, 1H), 4.91 (d, *J* = 11.2 Hz, 1H), 3.62 (s, 3H), 3.54 (s, 3H). <sup>13</sup>C NMR (100 MHz, CDCl<sub>3</sub>) δ = 166.78, 166.31, 161.10, 158.63, 139.96, 130.48, 130.40, 130.08, 128.91, 128.88, 125.45, 124.51, 124.19, 124.06, 115.73, 115.51, 105.65, 56.14, 56.09, 55.80, 52.95, 52.83 ppm. IR (KBr, thin film):  $\nu_{\max}$  = 3464, 3130, 3055, 2973, 2859, 1945, 1770, 1622, 1596, 1504, 1444, 1397, 1210, 1094, 1052, 1013, 976, 931, 881, 814, 765, 670, 631, 594 cm<sup>-1</sup>. ES-HRMS Calcd for C<sub>15</sub>H<sub>15</sub>FN<sub>2</sub>O<sub>4</sub>[M + Na]<sup>+</sup> *m/z* 329.0908, Found: *m/z* 329.0906.

### Dimethyl 2-((4-chlorophenyl)(1*H*-pyrazol-1-yl)methyl)malonate **3ha**:

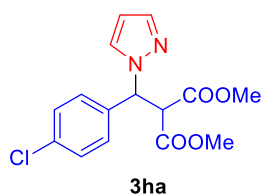

Prepared according to **general procedure**. 92% yield. White solid, m.p.: 114 – 117 °C. <sup>1</sup>H NMR (400 MHz, CDCl<sub>3</sub>): δ = 7.49 (s, 1H), 7.43 (s, 1H), 7.39 (d, *J* = 8.0 Hz, 2H), 7.25 (d, *J* = 8.0 Hz, 2H), 6.18 (s, 1H), 5.91 (d, *J* = 11.2 Hz, 1H), 4.79 (d, *J* = 11.2 Hz, 1H), 3.61 (s, 3H), 3.52 (s, 3H). <sup>13</sup>C NMR (100 MHz, CDCl<sub>3</sub>) δ = 166.74, 166.57, 139.88, 135.22, 134.64, 129.89, 129.10, 128.85, 105.95, 63.35, 56.97, 52.97, 52.87 ppm. IR (KBr,

thin film):  $V_{\max} = 3456, 3131, 3075, 2972, 1768, 1604, 1503, 1443, 1358, 1308, 1152, 1093, 1053, 1016, 972, 929, 858, 795, 757, 668, 632, 587 \text{ cm}^{-1}$ . ES-HRMS Calcd for  $\text{C}_{15}\text{H}_{15}\text{ClN}_2\text{O}_4[\text{M} + \text{Na}]^+$  m/z 345.0613, Found: m/z 345.0611.

### Dimethyl 2-((3-chlorophenyl)(1H-pyrazol-1-yl)methyl)malonate **3ia**:

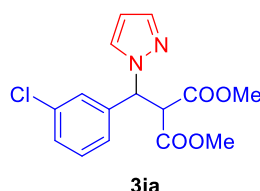

Prepared according to **general procedure**. 87% yield. White solid, m.p.: 135 – 138 °C.  $^1\text{H}$  NMR (400 MHz,  $\text{CDCl}_3$ ):  $\delta = 7.50$  (s, 1H), 7.44 (s, 2H), 7.36 – 7.30 (m, 1H), 7.27 – 7.18 (m, 2H), 6.19 (s, 1H), 5.89 (d,  $J = 11.2$  Hz, 1H), 4.79 (d,  $J = 11.2$  Hz, 1H), 3.61 (s, 3H), 3.53 (s, 3H).  $^{13}\text{C}$  NMR (100 MHz,  $\text{CDCl}_3$ )  $\delta = 166.68, 166.52, 139.93, 139.06, 134.42, 129.95, 128.92, 127.86, 125.82, 106.01, 63.43, 56.82, 52.99, 52.88$  ppm. IR (KBr, thin film):

$V_{\max} = 3440, 3135, 3026, 2970, 1759, 1583, 1516, 1485, 1439, 1404, 1361, 1314, 1157, 1093, 1054, 1013, 973, 930, 882, 821, 788, 762, 699, 632, 584 \text{ cm}^{-1}$ . ES-HRMS Calcd for  $\text{C}_{15}\text{H}_{15}\text{ClN}_2\text{O}_4[\text{M} + \text{Na}]^+$  m/z 345.0613, Found: m/z 345.0604.

### Dimethyl 2-((2-chlorophenyl)(1H-pyrazol-1-yl)methyl)malonate **3ja**:

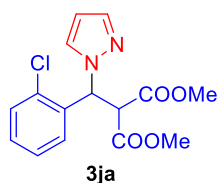

Prepared according to **general procedure**. 64% yield. Yellow oil.  $^1\text{H}$  NMR (400 MHz,  $\text{CDCl}_3$ ):  $\delta = 7.70$  (d,  $J = 7.6$  Hz, 1H), 7.54 (s, 1H), 7.46 (s, 1H), 7.33 (d,  $J = 7.6$  Hz, 1H), 7.28 – 7.15 (m, 2H), 6.58 (d,  $J = 11.2$  Hz, 1H), 6.15 (s, 1H), 4.93 (d,  $J = 11.2$  Hz, 1H), 3.61 (s, 3H), 3.52 (s, 3H).  $^{13}\text{C}$  NMR (100 MHz,  $\text{CDCl}_3$ )  $\delta = 166.79, 166.21, 140.01, 134.26, 133.64, 130.39, 129.85, 129.78,$

128.87, 127.33, 105.54, 58.97, 55.99, 52.98, 52.84 ppm. IR (KBr, thin film):  $V_{\max} = 3462, 3132, 3038, 2975, 1768, 1602, 1520, 1441, 1398, 1362, 1293, 1149, 1094, 1051, 1009, 970, 929, 882, 820, 761, 699, 668, 629, 589 \text{ cm}^{-1}$ . ES-HRMS Calcd for  $\text{C}_{15}\text{H}_{15}\text{ClN}_2\text{O}_4[\text{M} + \text{Na}]^+$  m/z 345.0613, Found: m/z 345.0612.

### Dimethyl 2-((4-bromophenyl)(1H-pyrazol-1-yl)methyl)malonate **3ka**:

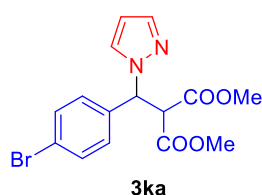

Prepared according to **general procedure**. 74% yield. White solid, m.p.: 115 – 117 °C.  $^1\text{H}$  NMR (400 MHz,  $\text{CDCl}_3$ ):  $\delta = 7.50$  (s, 1H), 7.43 (s, 1H), 7.42 (d,  $J = 8.4$  Hz, 2H), 7.33 (d,  $J = 8.4$  Hz, 2H), 6.19 (s, 1H), 5.89 (d,  $J = 11.2$  Hz, 1H), 4.79 (d,  $J = 11.2$  Hz, 1H), 3.62 (s, 3H), 3.54 (s, 3H).  $^{13}\text{C}$  NMR (100 MHz,  $\text{CDCl}_3$ )  $\delta = 166.73, 166.56, 139.91, 136.10, 131.83, 129.89, 129.40, 122.90, 105.97, 63.42, 56.82, 53.01, 52.91$  ppm. IR (KBr,

thin film):  $V_{\max} = 3446, 3129, 3073, 3022, 2969, 1764, 1601, 1500, 1440, 1358, 1315, 1152, 1088, 1055, 1017, 970, 927, 880, 837, 790, 758, 713, 665, 633, 589 \text{ cm}^{-1}$ . ES-HRMS Calcd for  $\text{C}_{15}\text{H}_{15}\text{BrN}_2\text{O}_4[\text{M} + \text{Na}]^+$  m/z 389.0107, Found: m/z 389.0104.

### Dimethyl 2-((3-bromophenyl)(1*H*-pyrazol-1-yl)methyl)malonate 3la:

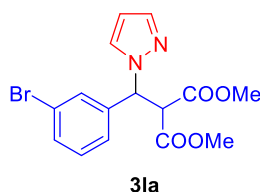

Prepared according to **general procedure**. 71% yield. White solid, m.p.: 108 – 110 °C. <sup>1</sup>H NMR (400 MHz, CDCl<sub>3</sub>): δ = 7.60 (s, 1H), 7.49 (s, 1H), 7.44 (d, *J* = 1.6 Hz, 1H), 7.38 (d, *J* = 8.0 Hz, 2H), 7.14 (t, *J* = 8.0 Hz, 1H), 6.18 (s, 1H), 5.89 (d, *J* = 11.2 Hz, 1H), 4.79 (d, *J* = 11.2 Hz, 1H), 3.60 (s, 3H), 3.52 (s, 3H). <sup>13</sup>C NMR (100 MHz, CDCl<sub>3</sub>) δ = 166.66, 166.50, 139.94, 139.30, 131.84, 130.76, 130.24, 129.97, 126.28, 122.53, 106.02, 63.36,

56.84, 52.99, 52.89 ppm. IR (KBr, thin film):  $\nu_{\max}$  = 3440, 3135, 3031, 2969, 1759, 1603, 1576, 1516, 1483, 1437, 1403, 1359, 1314, 1089, 1052, 1017, 972, 935, 887, 821, 758, 693, 631, 580 cm<sup>-1</sup>. ES-HRMS Calcd for C<sub>15</sub>H<sub>15</sub>BrN<sub>2</sub>O<sub>4</sub>[M + Na]<sup>+</sup> m/z 389.0107, Found: m/z 389.0105.

### Dimethyl 2-((2-bromophenyl)(1-*H*-pyrazolyl)methyl)malonate 3ma:

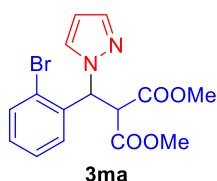

Prepared according to **general procedure**. 52% yield. White solid, m.p.: 111 – 114 °C. <sup>1</sup>H NMR (400 MHz, CDCl<sub>3</sub>): δ = 7.73 (d, *J* = 7.6 Hz, 1H), 7.59 (s, 1H), 7.54 (d, *J* = 7.6 Hz, 1H), 7.48 (s, 1H), 7.30 (t, *J* = 7.6 Hz, 1H), 7.12 (t, *J* = 7.6 Hz, 1H), 6.59 (d, *J* = 11.2 Hz, 1H), 6.17 (s, 1H), 4.94 (d, *J* = 11.2 Hz, 1H), 3.64 (s, 3H), 3.54 (s, 3H). <sup>13</sup>C NMR (100 MHz, CDCl<sub>3</sub>) δ = 166.78, 166.19, 140.03,

135.85, 133.13, 130.42, 130.11, 129.08, 127.97, 124.28, 105.53, 61.62, 56.17, 53.00, 52.84 ppm. IR (KBr, thin film):  $\nu_{\max}$  = 3460, 3159, 3134, 3107, 2974, 1770, 1520, 1439, 1386, 1360, 1292, 1212, 1093, 1053, 1017, 970, 928, 881, 80, 760, 673, 628, 588 cm<sup>-1</sup>. ES-HRMS Calcd for C<sub>15</sub>H<sub>15</sub>BrN<sub>2</sub>O<sub>4</sub>[M + Na]<sup>+</sup> m/z 389.0107, Found: m/z 389.0105.

### Dimethyl 2-((1*H*-pyrazol-1-yl)(4-(trifluoromethyl)phenyl)methyl)malonate 3na:

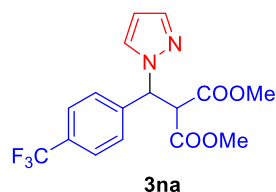

Prepared according to **general procedure**. 81% yield. Yellow oil. <sup>1</sup>H NMR (400 MHz, CDCl<sub>3</sub>): δ = 7.60 (d, *J* = 8.0 Hz, 2H), 7.55 (d, *J* = 8.0 Hz, 2H), 7.51 (s, 1H), 7.46 (s, 1H), 6.20 (s, 1H), 6.00 (d, *J* = 11.2 Hz, 1H), 4.84 (d, *J* = 11.2 Hz, 1H), 3.62 (s, 3H), 3.52 (s, 3H). <sup>13</sup>C NMR (100 MHz, CDCl<sub>3</sub>) δ = 166.63, 166.49, 140.96, 140.07, 130.64, 130.62, 130.03, 128.18, 125.68, 125.64, 125.60, 125.57, 125.14, 122.43, 106.07, 63.48,

56.76, 53.00, 52.86 ppm. IR (KBr, thin film):  $\nu_{\max}$  = 3456, 3156, 2974, 1760, 1630, 1522, 1441, 1404, 1325, 1175, 1118, 1073, 1024, 968, 925, 864, 815, 761, 672, 633, 556 cm<sup>-1</sup>. ES-HRMS Calcd for C<sub>16</sub>H<sub>15</sub>F<sub>3</sub>N<sub>2</sub>O<sub>4</sub>[M + Na]<sup>+</sup> m/z 379.0876, Found: m/z 379.0876.

### Dimethyl 2-((1*H*-pyrazol-1-yl)(*p*-tolyl)methyl)malonate 3oa:

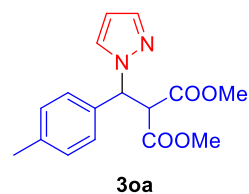

Prepared according to **general procedure**. 63% yield. Yellow oil. <sup>1</sup>H NMR (400 MHz, CDCl<sub>3</sub>): δ = 7.49 (s, 1H), 7.42 (s, 1H), 7.32 (d, *J* = 8.0 Hz, 2H), 7.10 (d, *J* = 8.0 Hz, 2H), 6.18 (s, 1H), 5.90 (d, *J* = 11.2 Hz, 1H), 4.81 (d, *J* = 11.2 Hz, 1H), 3.63 (s, 3H), 3.52 (s, 3H), 2.29 (s, 3H). <sup>13</sup>C NMR (100 MHz, CDCl<sub>3</sub>) δ = 166.07, 166.74, 139.54, 138.51, 134.10, 129.68, 129.36, 127.46, 105.74, 63.88, 56.97, 52.90, 52.76, 21.12 ppm. IR (KBr, thin film):  $\nu_{\max}$  =

3483, 2968, 1752, 1522, 1443, 1401, 1269, 1155, 1095, 1029, 972, 932, 759, 631, 584 cm<sup>-1</sup>. ES-HRMS Calcd for C<sub>16</sub>H<sub>18</sub>N<sub>2</sub>O<sub>4</sub>[M + Na]<sup>+</sup> m/z 325.1159, Found: m/z 325.1157.



### Dimethyl 2-((1*H*-pyrazol-1-yl)(*m*-tolyl)methyl)malonate 3pa:

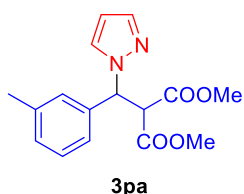

Prepared according to **general procedure**. 91% yield. White solid, m.p.: 104 – 106 °C. <sup>1</sup>H NMR (400 MHz, CDCl<sub>3</sub>): δ = 7.49 (s, 1H), 7.43 (s, 1H), 7.23 (s, 1H), 7.22 – 7.13 (m, 2H), 7.10 – 7.04 (m, 1H), 6.17 (s, 1H), 5.90 (d, *J* = 11.2 Hz, 1H), 4.82 (d, *J* = 11.2 Hz, 1H), 3.60 (s, 3H), 3.49 (s, 3H), 2.28 (s, 3H). <sup>13</sup>C NMR (100 MHz, CDCl<sub>3</sub>) δ = 167.01, 166.71, 139.51, 138.35, 137.02, 129.75, 129.47, 128.52, 128.21, 124.58, 105.77, 64.08, 56.93, 52.86, 52.70, 21.37 ppm. IR (KBr, thin film): *V*<sub>max</sub> = 3484, 2968, 1757, 1651, 1443, 1281, 1156, 1096, 1030, 760, 632, 581 cm<sup>-1</sup>. ES-HRMS Calcd for C<sub>16</sub>H<sub>18</sub>N<sub>2</sub>O<sub>4</sub>[M + Na]<sup>+</sup> *m/z* 325.1159, Found: *m/z* 325.1157.

### Dimethyl 2-((1*H*-pyrazol-1-yl)(*o*-tolyl)methyl)malonate 3qa:

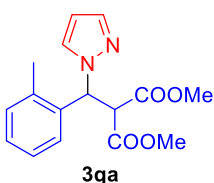

Prepared according to **general procedure**. 55% yield. White solid, m.p.: 84 – 86 °C. <sup>1</sup>H NMR (400 MHz, CDCl<sub>3</sub>): δ = 7.56 (d, *J* = 6.8 Hz, 1H), 7.46 (s, 1H), 7.37 (s, 1H), 7.30 – 7.20 (m, 3H), 6.27 (d, *J* = 11.2 Hz, 1H), 6.15 (s, 1H), 4.86 (d, *J* = 11.2 Hz, 1H), 3.62 (s, 3H), 3.47 (s, 3H), 2.45 (s, 3H). <sup>13</sup>C NMR (100 MHz, CDCl<sub>3</sub>) δ = 167.27, 166.64, 139.48, 136.26, 134.88, 130.85, 129.48, 128.59, 127.18, 126.46, 105.67, 59.56, 56.51, 52.94, 52.68, 19.44 ppm. IR (KBr, thin film): *V*<sub>max</sub> = 3468, 3130, 2969, 1741, 1509, 1442, 1400, 1360, 1319, 1248, 1204, 1147, 1094, 1029, 968, 931, 771, 630, 580 cm<sup>-1</sup>. ES-HRMS Calcd for C<sub>16</sub>H<sub>18</sub>N<sub>2</sub>O<sub>4</sub>[M + Na]<sup>+</sup> *m/z* 325.1159, Found: *m/z* 325.1157.

### Dimethyl 2-((4-methoxyphenyl)(1*H*-pyrazol-1-yl)methyl)malonate 3ra:

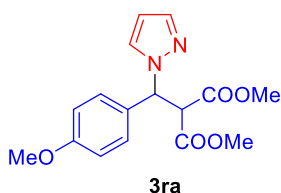

Prepared according to **general procedure**. 77% yield. White solid, m.p.: 95 – 98 °C. <sup>1</sup>H NMR (400 MHz, CDCl<sub>3</sub>): δ = 7.48 (s, 1H), 7.42 (s, 1H), 7.36 (d, *J* = 8.4 Hz, 2H), 6.81 (d, *J* = 8.4 Hz, 2H), 6.17 (s, 1H), 5.88 (d, *J* = 11.2 Hz, 1H), 4.78 (d, *J* = 11.2 Hz, 1H), 3.73 (s, 3H), 3.61 (s, 3H), 3.51 (s, 3H). <sup>13</sup>C NMR (100 MHz, CDCl<sub>3</sub>) δ = 167.05, 166.75, 159.68, 139.55, 129.65, 129.16, 128.89, 113.97, 105.70, 63.58, 57.10, 55.17, 52.89, 52.76 ppm. IR (KBr, thin film): *V*<sub>max</sub> = 3483, 2970, 1751, 1623, 1521, 1444, 1402, 1266, 1181, 1036, 755, 629, 558 cm<sup>-1</sup>. ES-HRMS Calcd for C<sub>16</sub>H<sub>18</sub>N<sub>2</sub>O<sub>5</sub>[M + Na]<sup>+</sup> *m/z* 341.1108, Found: *m/z* 341.1106.

### Dimethyl 2-((3-methoxyphenyl)(1*H*-pyrazol-1-yl)methyl)malonate 3sa:

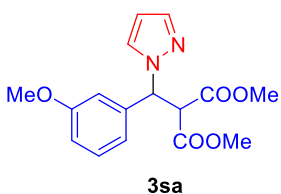

Prepared according to **general procedure**. 87% yield. White solid, m.p.: 88 – 91 °C. <sup>1</sup>H NMR (400 MHz, CDCl<sub>3</sub>): δ = 7.48 (s, 1H), 7.43 (s, 1H), 7.19 (t, *J* = 8.0 Hz, 1H), 6.98 (d, *J* = 7.2 Hz, 1H), 6.97 (s, 1H), 6.79 (d, *J* = 8.0 Hz, 1H), 6.18 (s, 1H), 5.90 (d, *J* = 11.2 Hz, 1H), 4.81 (d, *J* = 11.2 Hz, 1H), 3.72 (s, 3H), 3.61 (s, 3H), 3.51 (s, 3H). <sup>13</sup>C NMR (100 MHz, CDCl<sub>3</sub>) δ = 166.94, 166.66, 159.66, 139.55, 138.58, 129.81, 129.66, 119.75, 114.25, 113.03, 105.85, 63.98, 56.93, 55.14, 52.89, 52.76 ppm. IR (KBr, thin film): *V*<sub>max</sub> = 3449, 3132, 3048, 2973, 2851, 1735, 1607, 1505, 1402, 1361, 1246, 1091, 1044, 996, 971, 947, 780, 754, 664, 636, 567 cm<sup>-1</sup>. ES-HRMS Calcd for C<sub>16</sub>H<sub>18</sub>N<sub>2</sub>O<sub>5</sub>[M + Na]<sup>+</sup> *m/z* 341.1108, Found: *m/z* 341.1108.

### Dimethyl 2-((2-methoxyphenyl)(1*H*-pyrazol-1-yl)methyl)malonate 3ta:

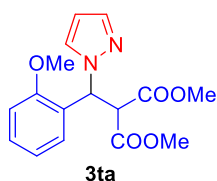

Prepared according to **general procedure**. 65% yield. Yellow oil. <sup>1</sup>H NMR (400 MHz, CDCl<sub>3</sub>): δ = 7.50 (d, *J* = 8.0 Hz, 1H), 7.49 (s, 1H), 7.45 (s, 1H), 7.23 (t, *J* = 8.0 Hz, 1H), 6.92 (t, *J* = 8.0 Hz, 1H), 6.84 (d, *J* = 8.0 Hz, 1H), 6.52 (d, *J* = 11.2 Hz, 1H), 6.13 (s, 1H), 4.92 (d, *J* = 11.2 Hz, 1H), 3.83 (s, 3H), 3.61 (s, 3H), 3.51 (s, 3H). <sup>13</sup>C NMR (100 MHz, CDCl<sub>3</sub>) δ = 167.33, 166.72, 156.61, 139.45, 130.07, 129.82, 128.11, 125.07, 120.76, 110.93, 105.08, 56.65, 55.65, 55.61, 52.84, 52.65 ppm. IR (KBr, thin film):  $V_{\max}$  = 3481, 1750, 1654, 1441, 1259, 1028, 755, 626, 574 cm<sup>-1</sup>. ES-HRMS Calcd for C<sub>16</sub>H<sub>18</sub>N<sub>2</sub>O<sub>5</sub>[M + Na]<sup>+</sup> *m/z* 341.1108, Found: *m/z* 341.1108.

### Dimethyl 2-(naphthalen-2-yl(1*H*-pyrazol-1-yl)methyl)malonate 3ua:

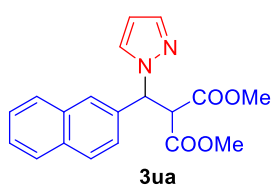

Prepared according to **general procedure**. 75% yield. White solid, m.p.: 129 – 131 °C. <sup>1</sup>H NMR (400 MHz, CDCl<sub>3</sub>): δ = 7.94 (s, 1H), 7.88 – 7.76 (m, 3H), 7.60 (d, *J* = 8.4 Hz, 1H), 7.56 (s, 1H), 7.50 (s, 1H), 7.48 – 7.42 (m, 2H), 6.21 (s, 1H), 6.17 (d, *J* = 11.2 Hz, 1H), 5.02 (d, *J* = 11.2 Hz, 1H), 3.67 (s, 3H), 3.45 (s, 3H). <sup>13</sup>C NMR (100 MHz, CDCl<sub>3</sub>) δ = 167.05, 166.78, 139.70, 134.57, 133.24, 133.02, 129.95, 128.68, 128.23, 127.67, 127.08, 126.60, 126.43, 124.96, 105.98, 64.27, 56.97, 53.00, 52.81 ppm. IR (KBr, thin film):  $V_{\max}$  = 3469, 2965, 1740, 1519, 1436, 1177, 756 cm<sup>-1</sup>. ES-HRMS Calcd for C<sub>19</sub>H<sub>18</sub>N<sub>2</sub>O<sub>4</sub>[M + Na]<sup>+</sup> *m/z* 361.1159, Found: *m/z* 361.1157.

### Dimethyl 2-(naphthalen-1-yl(1*H*-pyrazol-1-yl)methyl)malonate 3va:

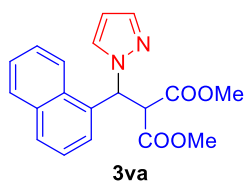

Prepared according to **general procedure**. 88% yield. Yellow oil. <sup>1</sup>H NMR (400 MHz, CDCl<sub>3</sub>): δ = 8.25 (d, *J* = 8.4 Hz, 1H), 7.84 (d, *J* = 9.2 Hz, 1H), 7.81 (d, *J* = 9.2 Hz, 1H), 7.76 (d, *J* = 7.2 Hz, 1H), 7.58 – 7.38 (m, 5H), 6.92 (d, *J* = 11.2 Hz, 1H), 6.16 (s, 1H), 5.05 (d, *J* = 11.2 Hz, 1H), 3.70 (s, 3H), 3.35 (s, 3H). <sup>13</sup>C NMR (100 MHz, CDCl<sub>3</sub>) δ = 167.37, 166.55, 139.41, 133.91, 132.53, 130.91, 129.66, 129.56, 128.99, 126.93, 125.94, 125.50, 125.24, 122.53, 106.03, 59.24, 56.77, 53.08, 52.70 ppm. IR (KBr, thin film):  $V_{\max}$  = 3479, 2971, 1749, 1442, 1258, 797 cm<sup>-1</sup>. ES-HRMS Calcd for C<sub>19</sub>H<sub>18</sub>N<sub>2</sub>O<sub>4</sub>[M + Na]<sup>+</sup> *m/z* 361.1159, Found: *m/z* 361.1156.

### Dimethyl 2-((1*H*-pyrazol-1-yl)(thiophen-3-yl)methyl)malonate 3wa:

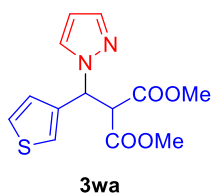

Prepared according to **general procedure**. 84% yield. Yellow oil. <sup>1</sup>H NMR (400 MHz, CDCl<sub>3</sub>): δ = 7.51 (s, 1H), 7.46 (s, 1H), 7.34 (s, 1H), 7.25 – 7.21 (m, 1H), 7.16 – 7.10 (m, 1H), 6.19 (s, 1H), 6.07 (d, *J* = 11.2 Hz, 1H), 4.72 (d, *J* = 11.2 Hz, 1H), 3.60 (s, 3H), 3.58 (s, 3H). <sup>13</sup>C NMR (100 MHz, CDCl<sub>3</sub>) δ = 166.79, 139.89, 137.80, 129.92, 126.77, 126.29, 123.79, 105.55, 59.70, 57.25, 52.92, 52.88 ppm. IR (KBr, thin film):  $V_{\max}$  = 3459, 3133, 2968, 1734, 1442, 1253, 1093, 1022, 970, 840, 761, 681, 646, 581 cm<sup>-1</sup>. ES-HRMS Calcd for C<sub>13</sub>H<sub>14</sub>N<sub>2</sub>O<sub>4</sub>S[M + Na]<sup>+</sup> *m/z* 317.0566, Found: *m/z* 317.0566.

### Dimethyl 2-((1*H*-pyrazol-1-yl)(thiophen-2-yl)methyl)malonate **3xa**:

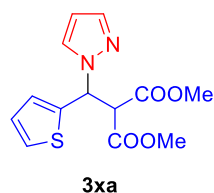

Prepared according to **general procedure**. 81% yield. Yellow oil. <sup>1</sup>H NMR (400 MHz, CDCl<sub>3</sub>): δ = 7.53 (s, 1H), 7.50 (s, 1H), 7.23 (d, *J* = 4.8 Hz, 1H), 7.10 (w, 1H), 6.93 – 6.88 (m, 1H), 6.24 (d, *J* = 11.2 Hz, 1H), 6.20 (s, 1H), 4.76 (d, *J* = 11.2 Hz, 1H), 3.60 (s, 6H). <sup>13</sup>C NMR (100 MHz, CDCl<sub>3</sub>) δ = 166.50, 166.49, 140.12, 139.33, 129.92, 126.76, 126.57, 126.52, 105.73, 59.64, 58.13, 52.96 ppm. IR (KBr, thin film):  $V_{\max}$  = 3469, 3127, 2968, 1739, 1443, 1253, 1091, 1027, 966, 861, 761, 635, 584 cm<sup>-1</sup>. ES-HRMS Calcd for C<sub>13</sub>H<sub>14</sub>N<sub>2</sub>O<sub>4</sub>S[M + Na]<sup>+</sup> *m/z* 317.0566, Found: *m/z* 317.0565.

### Dimethyl 2-(furan-2-yl(1*H*-pyrazol-1-yl)methyl)malonate **3ya**:

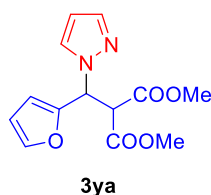

Prepared according to **general procedure**. 76% yield. Yellow oil. <sup>1</sup>H NMR (400 MHz, CDCl<sub>3</sub>): δ = 7.52 – 7.45 (m, 2H), 7.34 (s, 1H), 7.36 (d, *J* = 3.2 Hz, 1H), 6.31 – 6.28 (m, 1H), 6.19 (s, 1H), 6.08 (d, *J* = 11.2 Hz, 1H), 4.71 (d, *J* = 11.2 Hz, 1H), 3.65 (s, 3H), 3.58 (s, 3H). <sup>13</sup>C NMR (100 MHz, CDCl<sub>3</sub>) δ = 166.40, 166.38, 149.59, 142.97, 140.11, 129.82, 110.57, 108.75, 105.73, 57.64, 55.17, 53.03, 52.99 ppm. IR (KBr, thin film):  $V_{\max}$  = 3469, 1737, 1638, 1444, 1265, 1228, 767, 759 cm<sup>-1</sup>. ES-HRMS Calcd for C<sub>13</sub>H<sub>14</sub>N<sub>2</sub>O<sub>5</sub>[M + Na]<sup>+</sup> *m/z* 301.0795, Found: *m/z* 301.0891.

### Dimethyl 2-(1-(1*H*-pyrazol-1-yl)butyl)malonate **3za**:

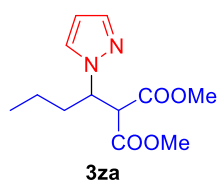

Prepared according to **general procedure**. 85% yield. Yellow oil. <sup>1</sup>H NMR (400 MHz, CDCl<sub>3</sub>): δ = 7.52 (s, 1H), 7.44 (s, 1H), 6.17 (s, 1H), 4.80 (dt, *J*<sub>1</sub> = 11.2 Hz, *J*<sub>2</sub> = 2.8 Hz, 1H), 4.13 (d, *J* = 11.2 Hz, 1H), 3.79 (s, 3H), 3.53 (s, 3H), 2.05 – 2.00 (m, 1H), 1.74 – 1.64 (m, 1H), 1.17 – 0.97 (m, 2H), 0.86 (t, *J* = 7.6 Hz, 3H). <sup>13</sup>C NMR (100 MHz, CDCl<sub>3</sub>) δ = 167.42, 167.04, 139.90, 130.69, 104.46, 60.70, 56.94, 52.74, 52.50, 34.64, 18.85, 13.24 ppm. IR (KBr, thin film):  $V_{\max}$  = 2978, 1756, 1444, 1284, 985, 770 cm<sup>-1</sup>. ES-HRMS Calcd for C<sub>12</sub>H<sub>18</sub>N<sub>2</sub>O<sub>4</sub>[M + Na]<sup>+</sup> *m/z* 277.1159, Found: *m/z* 277.1166.

### Dimethyl 2-(2-methyl-1-(1*H*-pyrazol-1-yl)propyl)malonate **3αa**:

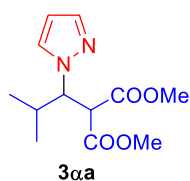

Prepared according to **general procedure**. 92% yield. Yellow oil. <sup>1</sup>H NMR (400 MHz, CDCl<sub>3</sub>): δ = 7.51 (s, 1H), 7.49 (d, *J* = 2.0 Hz, 1H), 6.23 (s, 1H), 4.75 (dd, *J*<sub>1</sub> = 10.0 Hz, *J*<sub>2</sub> = 5.6 Hz, 1H), 4.42 (d, *J* = 10.0 Hz, 1H), 3.82 (s, 3H), 3.57 (s, 3H), 2.32 – 2.20 (m, 1H), 0.94 (d, *J* = 2.0 Hz, 3H), 0.92 (d, *J* = 2.0 Hz, 3H). <sup>13</sup>C NMR (100 MHz, CDCl<sub>3</sub>) δ = 167.66, 167.10, 139.24, 131.32, 104.47, 65.62, 54.49, 52.89, 52.59, 31.12, 20.15, 17.31 ppm. IR (KBr, thin film):  $V_{\max}$  = 3477, 1750, 1444, 1258, 756 cm<sup>-1</sup>. ES-HRMS Calcd for C<sub>12</sub>H<sub>18</sub>N<sub>2</sub>O<sub>4</sub>[M + Na]<sup>+</sup> *m/z* 277.1159, Found: *m/z* 277.1163.

### Dimethyl 2-(3-methyl-1-(1*H*-pyrazol-1-yl)butyl)malonate **3βa**:

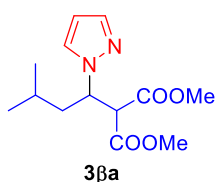

Prepared according to **general procedure**. 60% yield. Yellow oil. <sup>1</sup>H NMR (400 MHz, CDCl<sub>3</sub>): δ = 7.50 (s, 1H), 7.42 (s, 1H), 6.15 (s, 1H), 4.87 (dt, *J*<sub>1</sub> = 10.0 Hz, *J*<sub>2</sub> = 2.4 Hz, 1H), 4.06 (d, *J* = 10.0 Hz, 1H), 3.76 (s, 3H), 3.50 (s, 3H), 2.21 – 2.11 (m, 1H), 1.45 – 1.36 (m, 1H), 1.17 – 1.05 (m, 1H), 0.90 (d, *J* = 6.8 Hz, 3H), 0.79 (d, *J* = 6.8 Hz, 3H). <sup>13</sup>C NMR (100 MHz, CDCl<sub>3</sub>) δ = 167.43, 167.15, 139.97, 130.65, 104.56, 59.20, 57.28, 52.82, 52.61, 41.38, 24.34, 23.25, 20.87 ppm. IR (KBr, thin film): *V*<sub>max</sub> = 3450, 2973, 1738, 1445, 1248, 1196, 755, 631 cm<sup>-1</sup>. ES-HRMS Calcd for C<sub>13</sub>H<sub>20</sub>N<sub>2</sub>O<sub>4</sub>[M + Na]<sup>+</sup> *m/z* 291.1315, Found: *m/z* 291.1324.

### Dimethyl 2-(1-(1*H*-pyrazol-1-yl)decyl)malonate **3γa**:

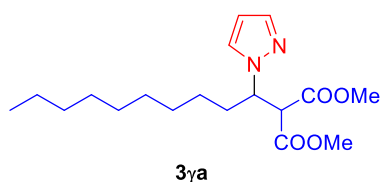

Prepared according to **general procedure**. 74% yield. Yellow oil. <sup>1</sup>H NMR (400 MHz, CDCl<sub>3</sub>): δ = 7.48 (s, 1H), 7.38 (s, 1H), 6.12 (s, 1H), 4.87 (dt, *J*<sub>1</sub> = 10.0 Hz, *J*<sub>2</sub> = 2.8 Hz, 1H), 4.08 (d, *J* = 10.0 Hz, 1H), 3.74 (s, 3H), 3.48 (s, 3H), 2.11 – 1.98 (m, 1H), 1.74 – 1.64 (m, 1H), 1.25 – 1.10 (m, 14H), 0.82 (t, *J* = 6.8 Hz, 3H). <sup>13</sup>C NMR (100 MHz, CDCl<sub>3</sub>) δ = 167.46, 167.08, 139.93, 130.69, 104.47, 60.97, 56.99, 52.75, 52.52, 32.61, 31.73, 29.30, 29.23, 29.11, 28.75, 25.61, 22.54, 13.98 ppm. IR (KBr, thin film): *V*<sub>max</sub> = 3464, 2940, 1752, 1641, 751 cm<sup>-1</sup>. ES-HRMS Calcd for C<sub>18</sub>H<sub>30</sub>N<sub>2</sub>O<sub>4</sub>[M + H]<sup>+</sup> *m/z* 339.2278, Found: *m/z* 339.2291.

### Dimethyl 2-((4-chloro-1*H*-pyrazol-1-yl)(phenyl)methyl)malonate **3ab**:

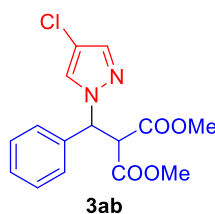

Prepared according to **general procedure**. 68% yield. White solid, m.p.: 136 – 138 °C. <sup>1</sup>H NMR (400 MHz, CDCl<sub>3</sub>): δ = 7.43 (s, 1H), 7.41 (s, 1H), 7.41 – 7.36 (m, 2H), 7.33 – 7.26 (m, 3H), 5.86 (d, *J* = 11.2 Hz, 1H), 4.79 (d, *J* = 11.2 Hz, 1H), 3.67 (s, 3H), 3.49 (s, 3H). <sup>13</sup>C NMR (100 MHz, CDCl<sub>3</sub>) δ = 166.84, 166.44, 137.98, 136.41, 129.01, 128.80, 127.84, 127.53, 110.49, 64.58, 56.47, 53.06, 52.82 ppm. IR (KBr, thin film): *V*<sub>max</sub> = 3471, 3139, 3058, 3022, 2970, 2860, 1736, 1615, 1504, 1441, 1372, 1326, 1263, 1030, 970, 938, 885, 810, 744, 704, 668, 621, 578 cm<sup>-1</sup>. ES-HRMS Calcd for C<sub>15</sub>H<sub>15</sub>ClN<sub>2</sub>O<sub>4</sub>[M + Na]<sup>+</sup> *m/z* 345.0613, Found: *m/z* 345.0611.

### Dimethyl 2-((4-bromo-1*H*-pyrazol-1-yl)(phenyl)methyl)malonate **3ac**:

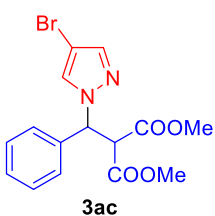

Prepared according to **general procedure**. 77% yield. White solid, m.p.: 121 – 123 °C. <sup>1</sup>H NMR (400 MHz, CDCl<sub>3</sub>): δ = 7.46 (s, 1H), 7.44 (s, 1H), 7.42 – 7.36 (m, 2H), 7.33 – 7.26 (m, 3H), 5.89 (d, *J* = 11.2 Hz, 1H), 4.80 (d, *J* = 11.2 Hz, 1H), 3.65 (s, 3H), 3.48 (s, 3H). <sup>13</sup>C NMR (100 MHz, CDCl<sub>3</sub>) δ = 166.81, 166.43, 140.07, 136.43, 130.01, 129.02, 128.80, 127.56, 93.69, 64.53, 56.49, 53.05, 52.82 ppm. IR (KBr, thin film): *V*<sub>max</sub> = 3473, 3131, 3024, 2971, 2858, 1736, 1613, 1502, 1437, 1387, 1168, 1029, 982, 952, 883, 852, 813, 749, 703, 644, 618, 577 cm<sup>-1</sup>. ES-HRMS Calcd for C<sub>15</sub>H<sub>15</sub>BrN<sub>2</sub>O<sub>4</sub>[M + Na]<sup>+</sup> *m/z* 389.0107, Found: *m/z* 389.0106.

### Dimethyl 2-((3-bromo-1H-pyrazol-1-yl)(phenyl)methyl)malonate 3ad:

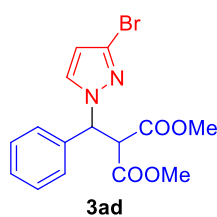

Prepared according to **general procedure**. 55% yield. White solid, m.p.: 113 – 116 °C. <sup>1</sup>H NMR (400 MHz, CDCl<sub>3</sub>): δ = 7.48 – 7.40 (m, 2H), 7.35 (s, 1H), 7.33 – 7.27 (m, 3H), 6.19 (s, 1H), 5.85 (d, *J* = 11.2 Hz, 1H), 4.80 (d, *J* = 11.2 Hz, 1H), 3.65 (s, 3H), 3.47 (s, 3H). <sup>13</sup>C NMR (100 MHz, CDCl<sub>3</sub>) δ = 166.86, 166.49, 136.23, 132.03, 128.98, 128.75, 127.72, 125.91, 108.81, 64.84, 56.63, 53.01, 52.81 ppm. IR (KBr, thin film): *V*<sub>max</sub> = 3456, 3132, 3015, 2967, 2856, 1973, 1758, 1613, 1502, 1441, 1337, 1155, 1047, 1013, 966, 930, 870, 814, 754, 703, 669, 639, 563 cm<sup>-1</sup>. ES-HRMS Calcd for C<sub>15</sub>H<sub>15</sub>BrN<sub>2</sub>O<sub>4</sub>[M + Na]<sup>+</sup> *m/z* 389.0107, Found: *m/z* 389.0106.

### Dimethyl 2-((4-methyl-1H-pyrazol-1-yl)(phenyl)methyl)malonate 3ae:

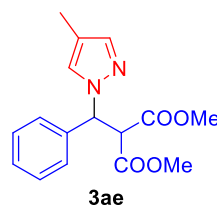

Prepared according to **general procedure**. 94% yield. White solid, m.p.: 93 – 95 °C. <sup>1</sup>H NMR (400 MHz, CDCl<sub>3</sub>): δ = 7.42 – 7.37 (m, 2H), 7.32 – 7.25 (m, 4H), 7.19 (s, 1H), 5.84 (d, *J* = 11.2 Hz, 1H), 4.82 (d, *J* = 11.2 Hz, 1H), 3.65 (s, 3H), 3.48 (s, 3H), 1.98 (s, 3H). <sup>13</sup>C NMR (100 MHz, CDCl<sub>3</sub>) δ = 167.10, 166.80, 140.02, 137.36, 128.64, 128.62, 128.48, 127.47, 116.39, 63.89, 56.80, 52.91, 52.70, 8.83 ppm. IR (KBr, thin film): *V*<sub>max</sub> = 3467, 3105, 2972, 1765, 1437, 1270, 1143, 1017, 971, 935, 853, 815, 753, 704, 673, 631, 580 cm<sup>-1</sup>. ES-HRMS Calcd for C<sub>16</sub>H<sub>18</sub>N<sub>2</sub>O<sub>4</sub>[M + Na]<sup>+</sup> *m/z* 325.1159, Found: *m/z* 325.1158.

### Dimethyl 2-((3-methyl-1H-pyrazol-1-yl)(phenyl)methyl)malonate 3af:

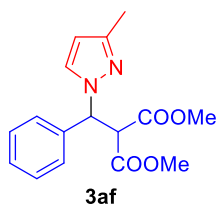

Prepared according to **general procedure**. 81% yield. Yellow oil. <sup>1</sup>H NMR (400 MHz, CDCl<sub>3</sub>): δ = 7.48 – 7.40 (m, 2H), 7.35 (s, 1H), 7.33 – 7.27 (m, 3H), 6.19 (s, 1H), 5.85 (d, *J* = 11.2 Hz, 1H), 4.80 (d, *J* = 11.2 Hz, 1H), 3.65 (s, 3H), 3.47 (s, 3H). <sup>13</sup>C NMR (100 MHz, CDCl<sub>3</sub>) δ = 167.07, 166.84, 148.70, 137.27, 130.31, 128.59, 128.55, 127.63, 105.45, 63.94, 56.91, 52.82, 52.67, 13.74 ppm. IR (KBr, thin film): *V*<sub>max</sub> = 3470, 2968, 1764, 1531, 1444, 1314, 1270, 1202, 1093, 1030, 937, 761, 705, 637, 590 cm<sup>-1</sup>. ES-HRMS Calcd for C<sub>16</sub>H<sub>18</sub>N<sub>2</sub>O<sub>4</sub>[M + Na]<sup>+</sup> *m/z* 325.1159, Found: *m/z* 325.1153.

### Dimethyl 2-((1H-indazol-1-yl)(phenyl)methyl)malonate 3ag:

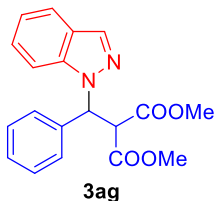

Prepared according to **general procedure**. 52% yield. White solid, m.p.: 112 – 115 °C. <sup>1</sup>H NMR (400 MHz, CDCl<sub>3</sub>): δ = 8.04 (s, 1H), 7.68 (d, *J* = 8.0 Hz, 1H), 7.57 – 7.50 (m, 2H), 7.50 (s, 1H), 7.35 (t, *J* = 8.0 Hz, 1H), 7.32 – 7.22 (m, 3H), 7.11 (t, *J* = 7.6 Hz, 1H), 6.32 (d, *J* = 11.2 Hz, 1H), 5.10 (d, *J* = 11.2 Hz, 1H), 3.56 (s, 3H), 3.55 (s, 3H). <sup>13</sup>C NMR (100 MHz, CDCl<sub>3</sub>) δ = 167.06, 167.00, 139.58, 136.97, 133.68, 128.65, 128.60, 127.67, 126.58, 124.25, 121.03, 120.99, 109.34, 60.99, 57.02, 52.89, 52.79 ppm. IR (KBr, thin film): *V*<sub>max</sub> = 3488, 3022, 2967, 1753, 1622, 1504, 1437, 1369, 1325, 1204, 1023, 971, 941, 870, 753, 703, 639, 603 cm<sup>-1</sup>. ES-HRMS Calcd for C<sub>19</sub>H<sub>18</sub>N<sub>2</sub>O<sub>4</sub>[M + Na]<sup>+</sup> *m/z* 361.1159, Found: *m/z* 361.1157.

### Dimethyl 2-(phenyl(1*H*-1,2,4-triazol-1-yl)methyl)malonate 3ah:

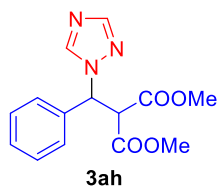

Prepared according to **general procedure**. 71% yield. White solid, m.p.: 148 – 151 °C. <sup>1</sup>H NMR (400 MHz, CDCl<sub>3</sub>): δ = 8.15 (s, 1H), 7.89 (s, 1H), 7.45 (w, 2H), 7.30 (w, 3H), 6.03 (d, *J* = 10.8 Hz, 1H), 4.74 (d, *J* = 10.8 Hz, 1H), 3.62 (s, 3H), 3.49 (s, 3H). <sup>13</sup>C NMR (100 MHz, CDCl<sub>3</sub>) δ = 166.54, 166.09, 151.98, 143.68, 135.38, 129.26, 128.88, 127.86, 62.11, 56.56, 53.13, 52.92 ppm. IR (KBr, thin film):  $V_{\max}$  = 3456, 3137, 3005, 2970, 1764, 1508, 1438, 1388, 1312, 1277, 1240, 1201, 1158, 1017, 972, 933, 874, 845, 821, 729, 705, 665, 638, 593 cm<sup>-1</sup>. ES-HRMS Calcd for C<sub>14</sub>H<sub>15</sub>N<sub>3</sub>O<sub>4</sub>[M + Na]<sup>+</sup> m/z 312.0955, Found: m/z 312.0952.

### Dimethyl 2-(phenyl(2*H*-1,2,3-triazol-2-yl)methyl)malonate 3ai:

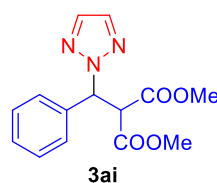

Prepared according to **general procedure**. 61% yield. White solid, m.p.: 116 – 118 °C. <sup>1</sup>H NMR (400 MHz, CDCl<sub>3</sub>): δ = 7.58 (s, 2H), 7.43 – 7.36 (m, 2H), 7.33 – 7.25 (m, 3H), 6.36 (d, *J* = 11.6 Hz, 1H), 4.88 (d, *J* = 11.6 Hz, 1H), 3.64 (s, 3H), 3.51 (s, 3H). <sup>13</sup>C NMR (100 MHz, CDCl<sub>3</sub>) δ = 166.54, 166.13, 135.67, 134.47, 129.02, 128.76, 127.55, 66.84, 56.88, 53.04, 52.87 ppm. IR (KBr, thin film):  $V_{\max}$  = 3458, 3142, 3050, 3023, 3000, 2969, 1736, 1503, 1444, 1308, 1206, 1156, 1015, 971, 935, 847, 760, 707, 641, 582 cm<sup>-1</sup>. ES-HRMS Calcd for C<sub>14</sub>H<sub>15</sub>N<sub>3</sub>O<sub>4</sub>[M + Na]<sup>+</sup> m/z 312.0955, Found: m/z 312.0952.

### Dimethyl 2-((1*H*-benzo[*d*][1,2,3]triazol-1-yl)(phenyl)methyl)malonate 3aj:

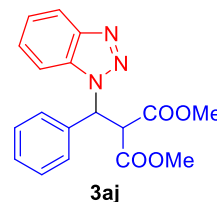

Prepared according to **general procedure**. 57% yield. White solid, m.p.: 135 – 138 °C. <sup>1</sup>H NMR (400 MHz, CDCl<sub>3</sub>): δ = 7.99 (d, *J* = 8.4 Hz, 1H), 7.54 – 7.43 (m, 3H), 7.39 (t, *J* = 8.0 Hz, 1H), 7.32 – 7.24 (m, 4H), 6.40 (d, *J* = 11.2 Hz, 1H), 5.20 (d, *J* = 11.2 Hz, 1H), 3.59 (s, 3H), 3.53 (s, 3H). <sup>13</sup>C NMR (100 MHz, CDCl<sub>3</sub>) δ = 166.65, 166.44, 145.95, 135.27, 132.87, 129.22, 128.96, 127.73, 127.64, 124.22, 119.88, 109.66, 61.51, 56.87, 53.12, 52.96 ppm. IR (KBr, thin film):  $V_{\max}$  = 3480, 3050, 2970, 1732, 1616, 1499, 1460, 1439, 1372, 1318, 1255, 1120, 1068, 1023, 984, 929, 874, 821, 784, 756, 702, 665, 621, 581 cm<sup>-1</sup>. ES-HRMS Calcd for C<sub>18</sub>H<sub>17</sub>N<sub>3</sub>O<sub>4</sub>[M + Na]<sup>+</sup> m/z 362.1111, Found: m/z 362.1108.

### Dimethyl 2-((2*H*-benzo[*d*][1,2,3]triazol-2-yl)(phenyl)methyl)malonate 3aj':

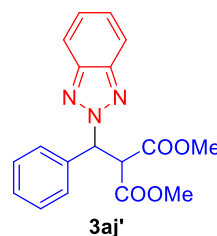

Prepared according to **general procedure**. 18% yield. White solid, m.p.: 149 – 152 °C. <sup>1</sup>H NMR (400 MHz, CDCl<sub>3</sub>): δ = 7.84 (dd, *J*<sub>1</sub> = 6.4 Hz, *J*<sub>2</sub> = 2.8 Hz, 2H), 7.50 (d, *J* = 6.4 Hz, 2H), 7.35 (dd, *J*<sub>1</sub> = 6.4 Hz, *J*<sub>2</sub> = 2.8 Hz, 2H), 7.33 – 7.28 (m, 3H), 6.64 (d, *J* = 11.6 Hz, 1H), 5.13 (d, *J* = 11.6 Hz, 1H), 3.62 (s, 3H), 3.56 (s, 3H). <sup>13</sup>C NMR (100 MHz, CDCl<sub>3</sub>) δ = 166.49, 166.09, 144.22, 135.32, 129.24, 128.86, 127.71, 126.50, 118.29, 68.49, 56.93, 53.11, 52.97 ppm. IR (KBr, thin film):  $V_{\max}$  = 3462, 2968, 1761, 1505, 1447, 1370, 1309, 1273, 1233, 1184, 1155, 982, 943, 792, 747, 705, 643, 594 cm<sup>-1</sup>. ES-HRMS Calcd for C<sub>18</sub>H<sub>17</sub>N<sub>3</sub>O<sub>4</sub>[M + Na]<sup>+</sup> m/z 362.1111, Found: m/z 362.1107.

## 5. Copy of $^1\text{H}$ NMR and $^{13}\text{C}$ NMR spectra for the products 3

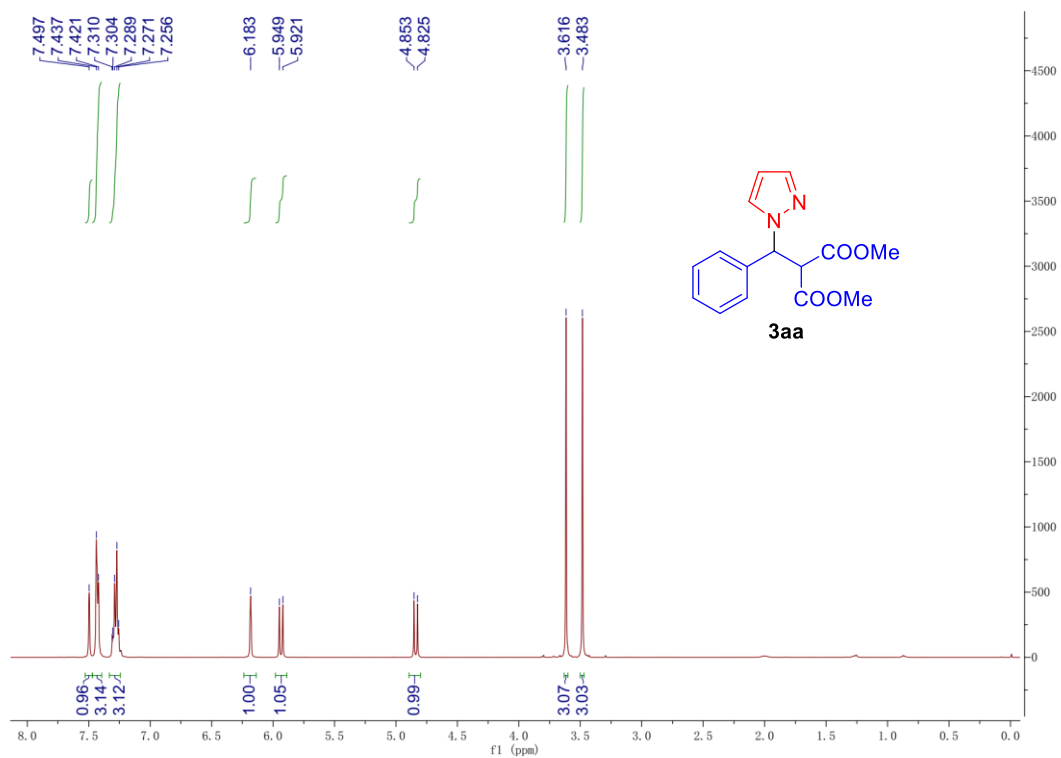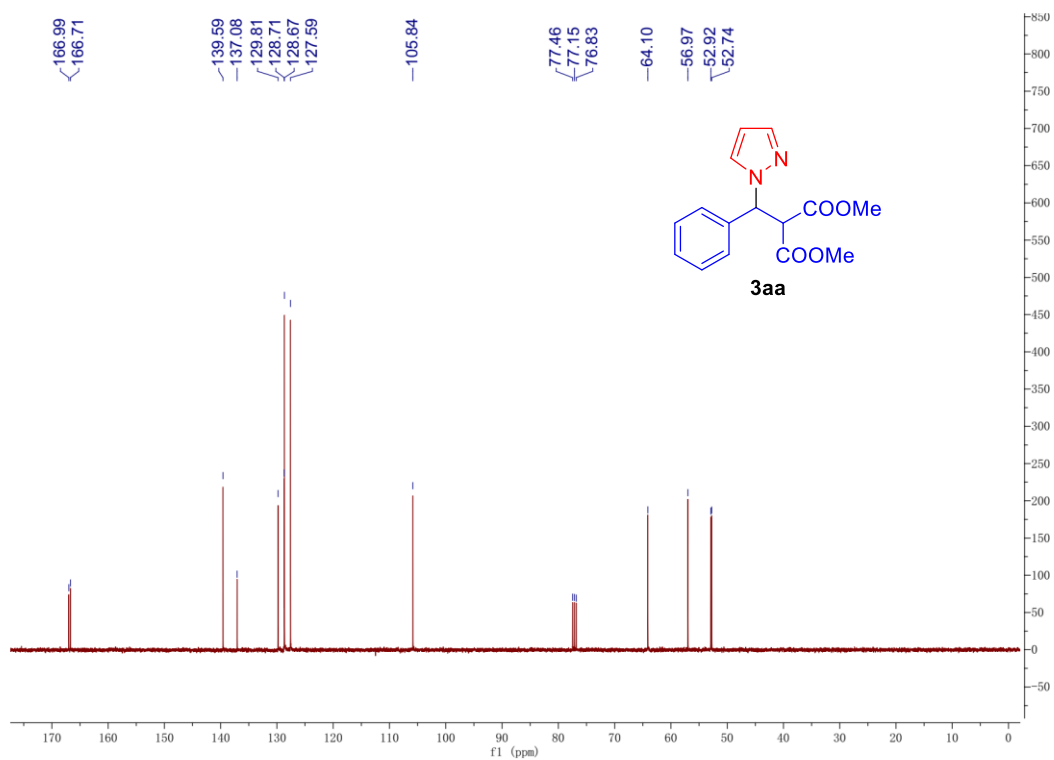

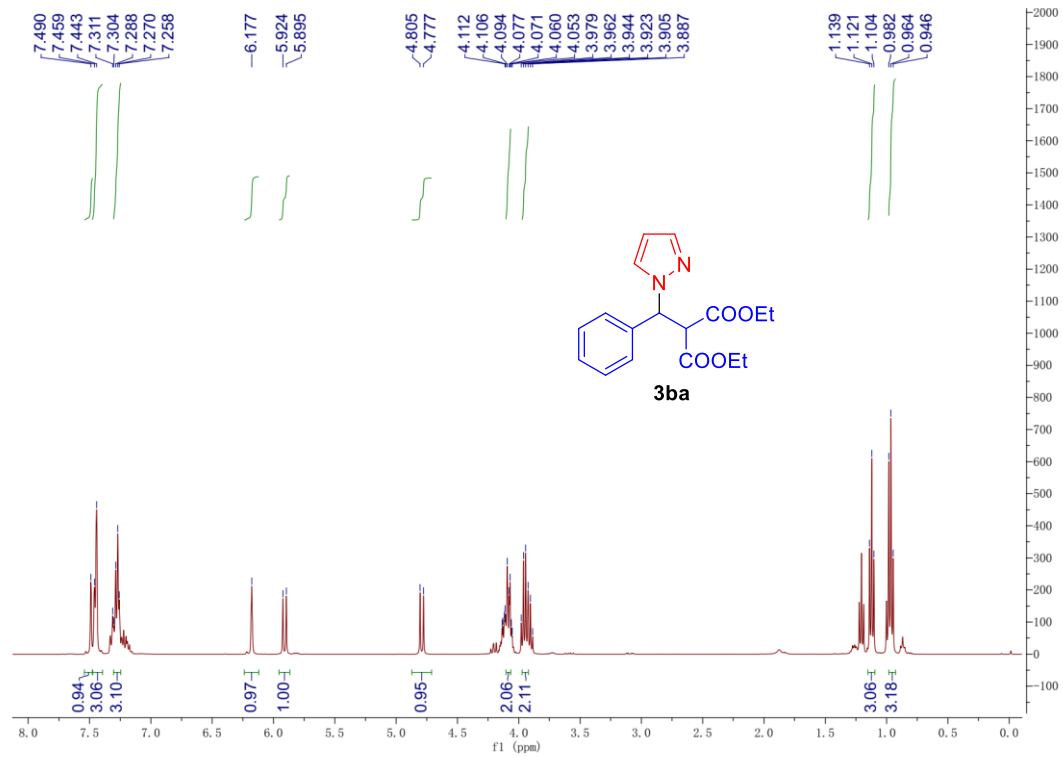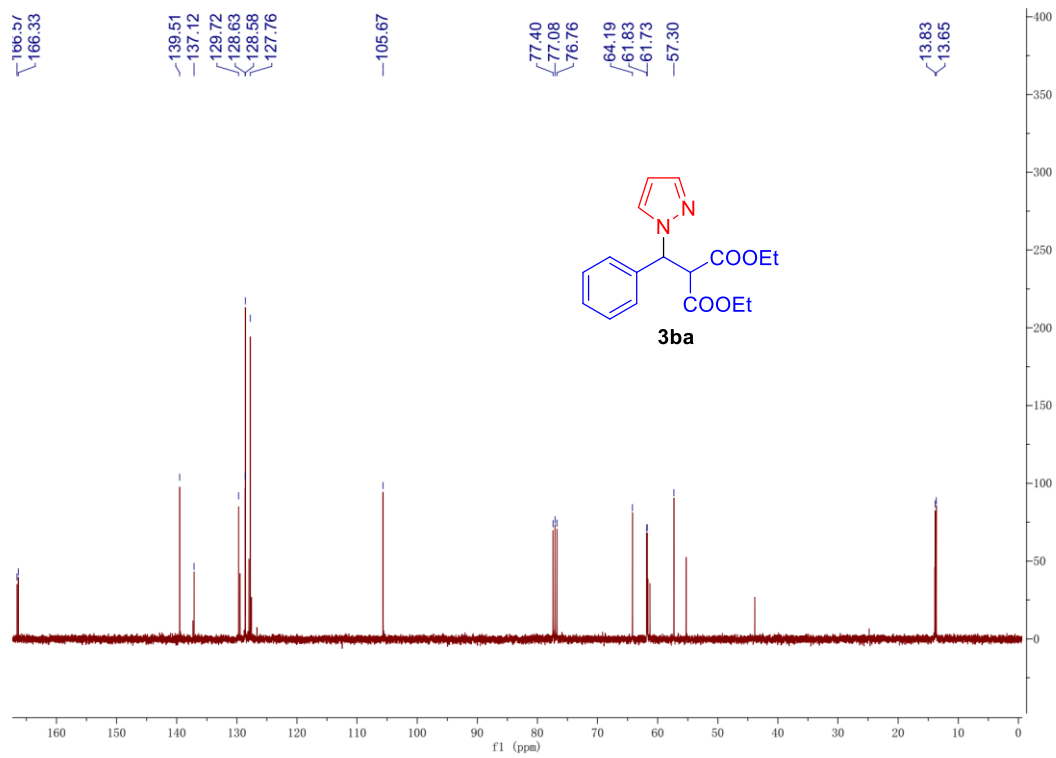



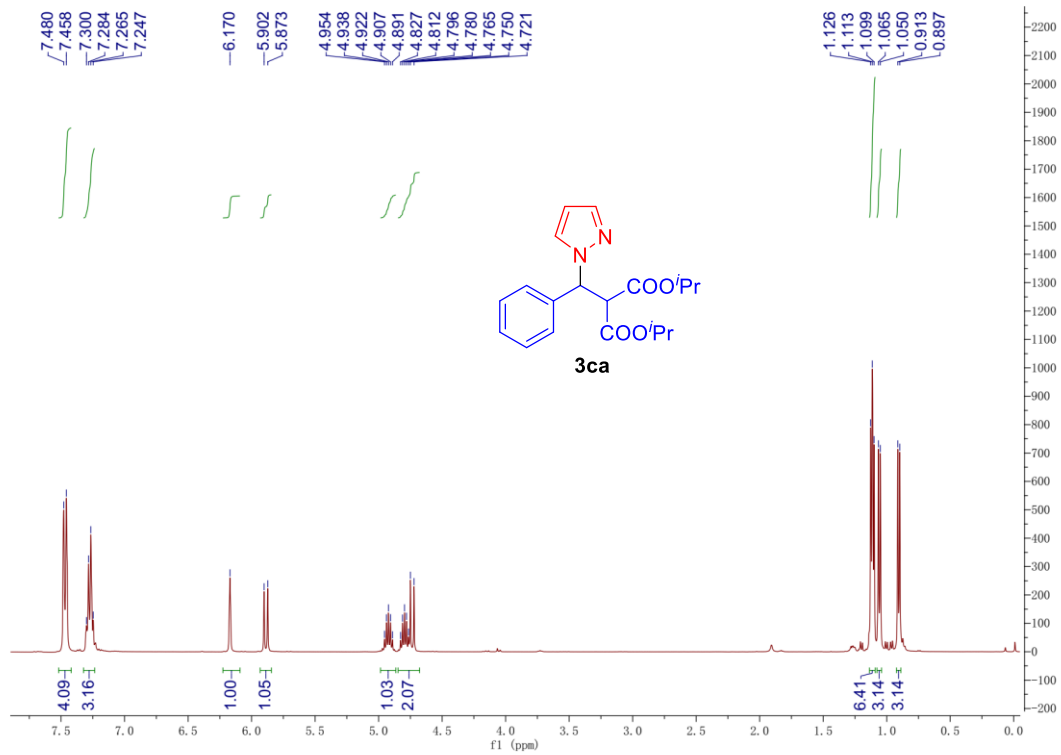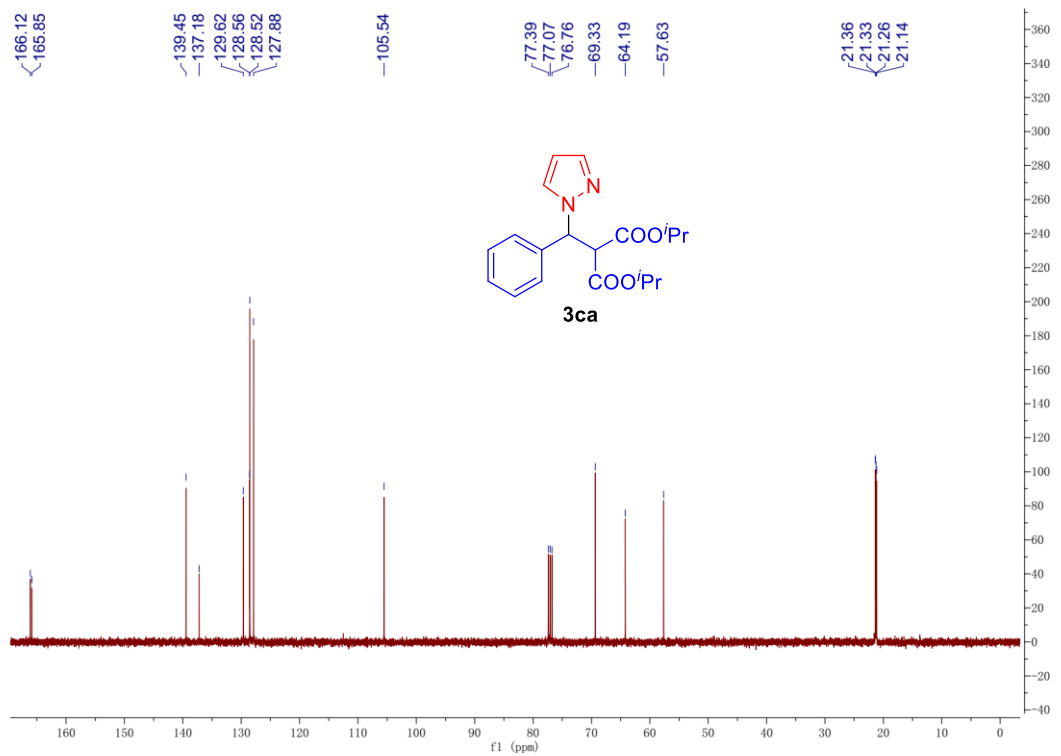

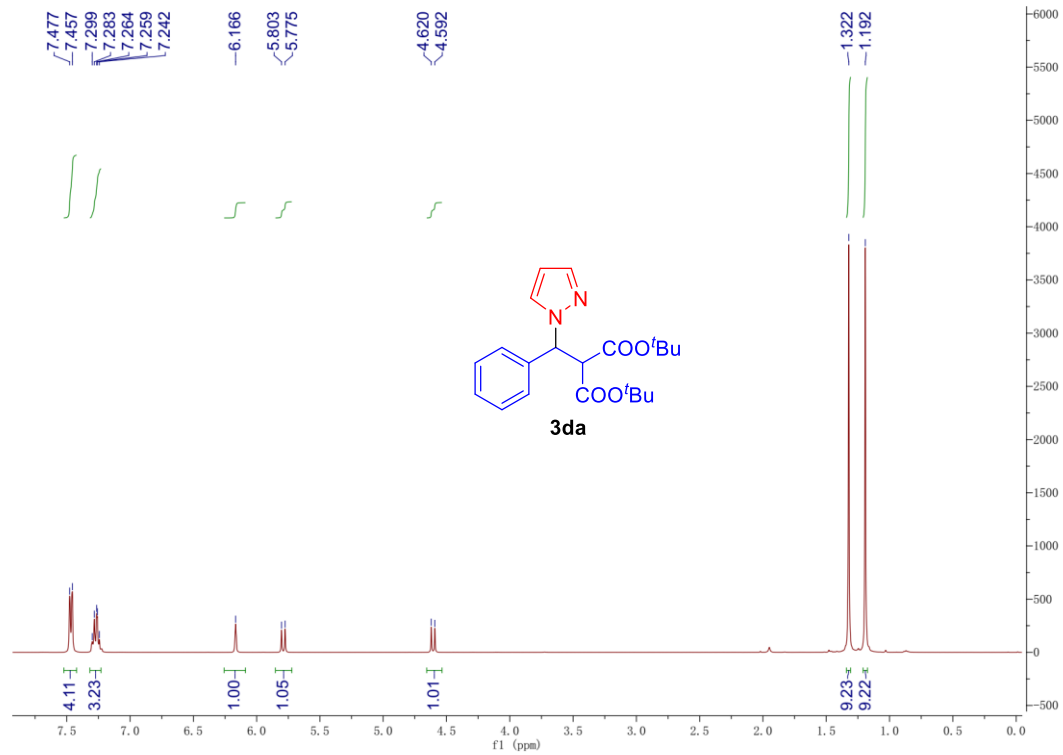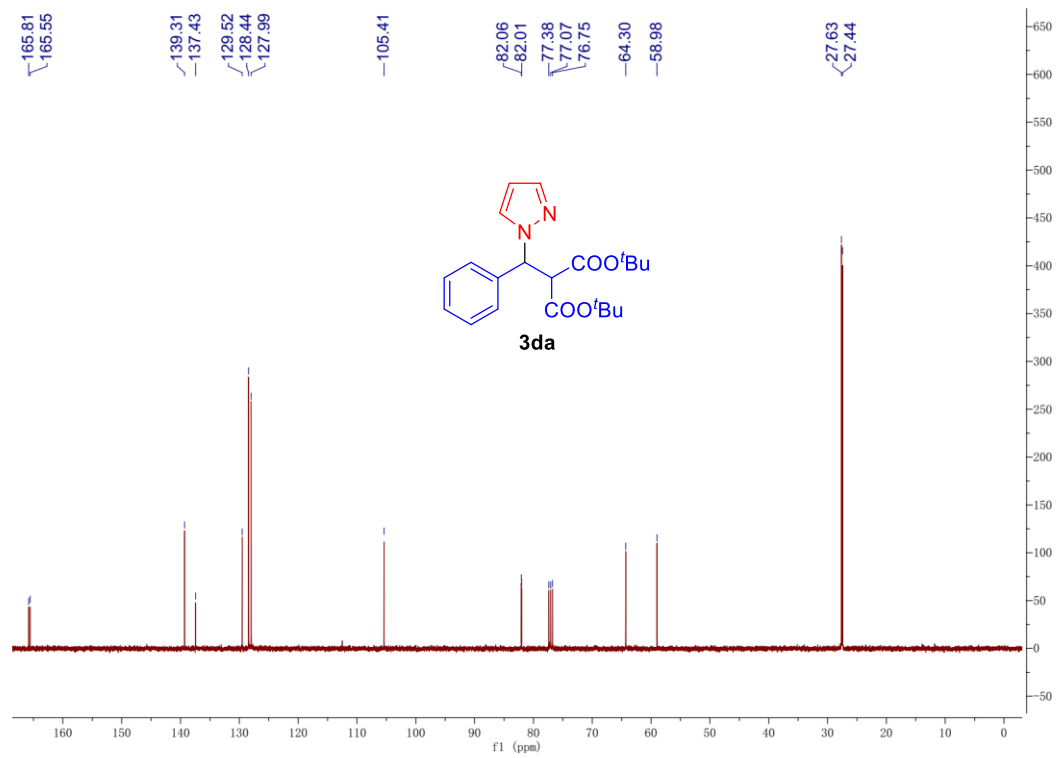

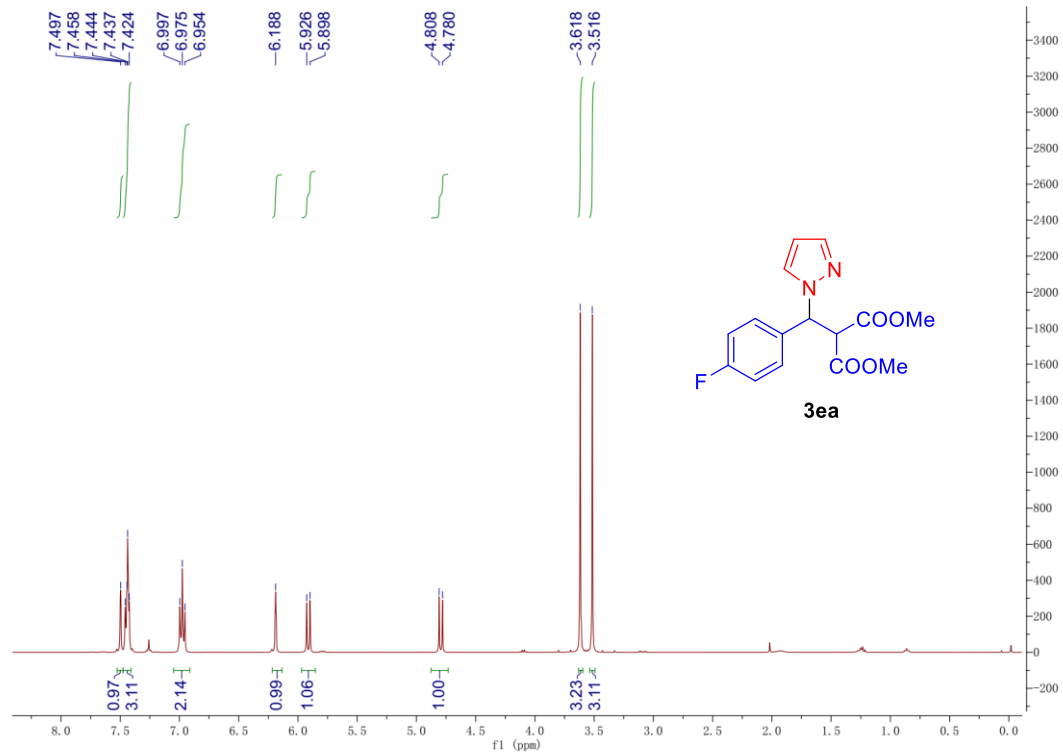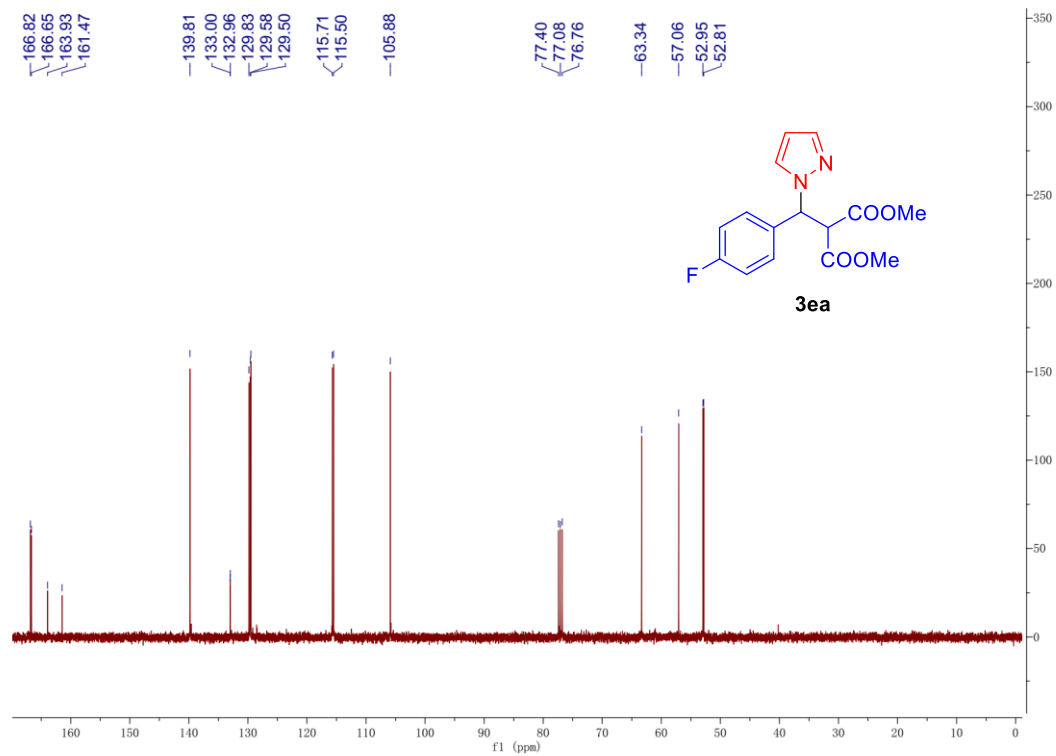

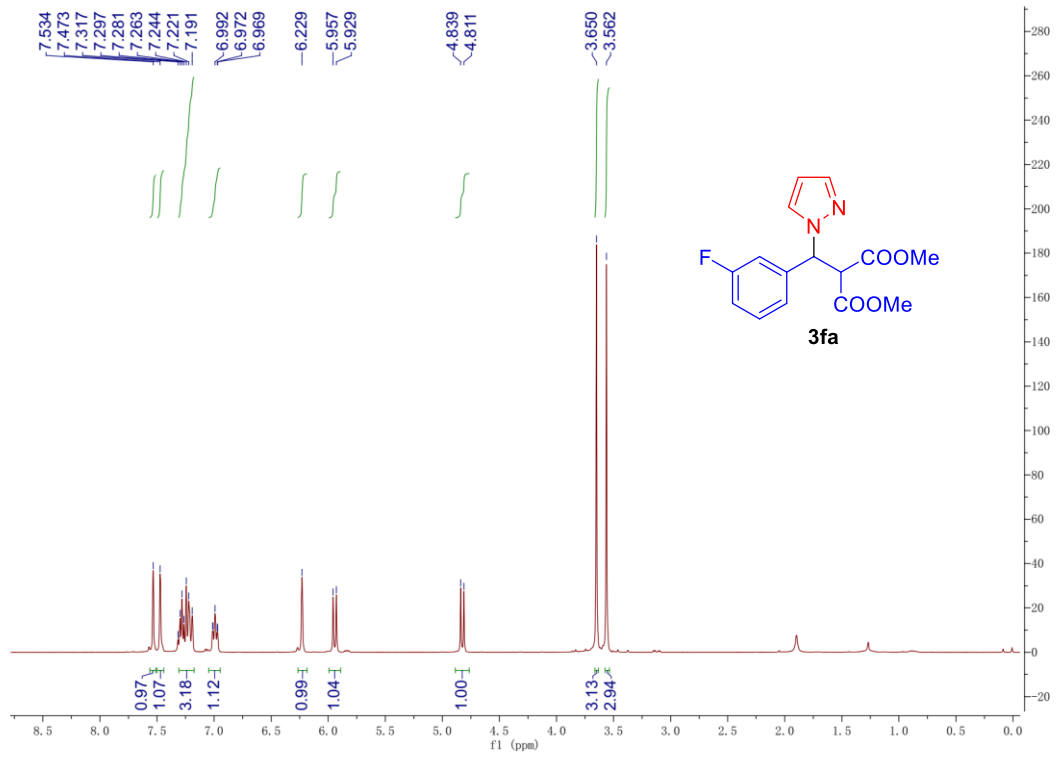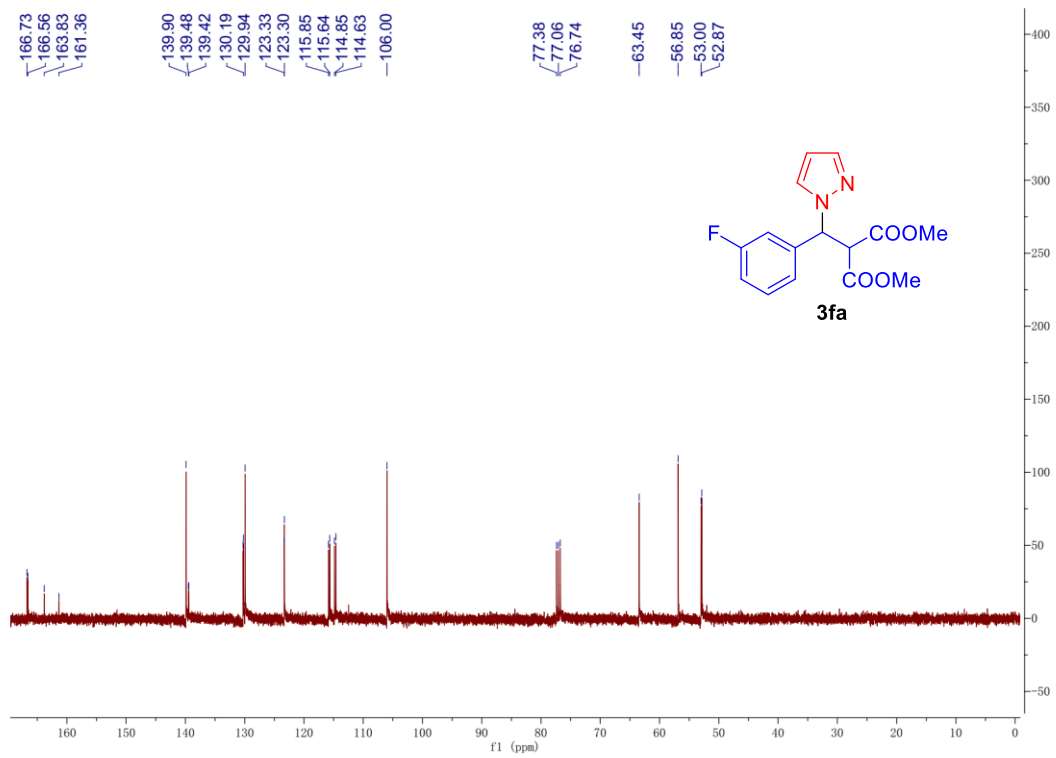

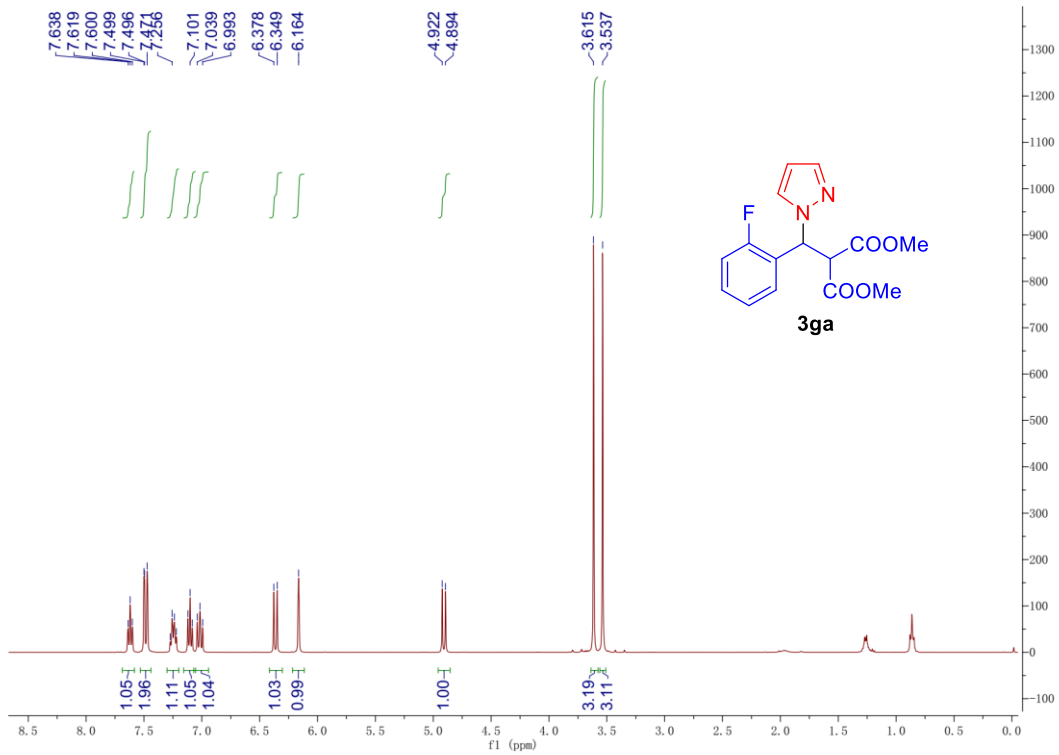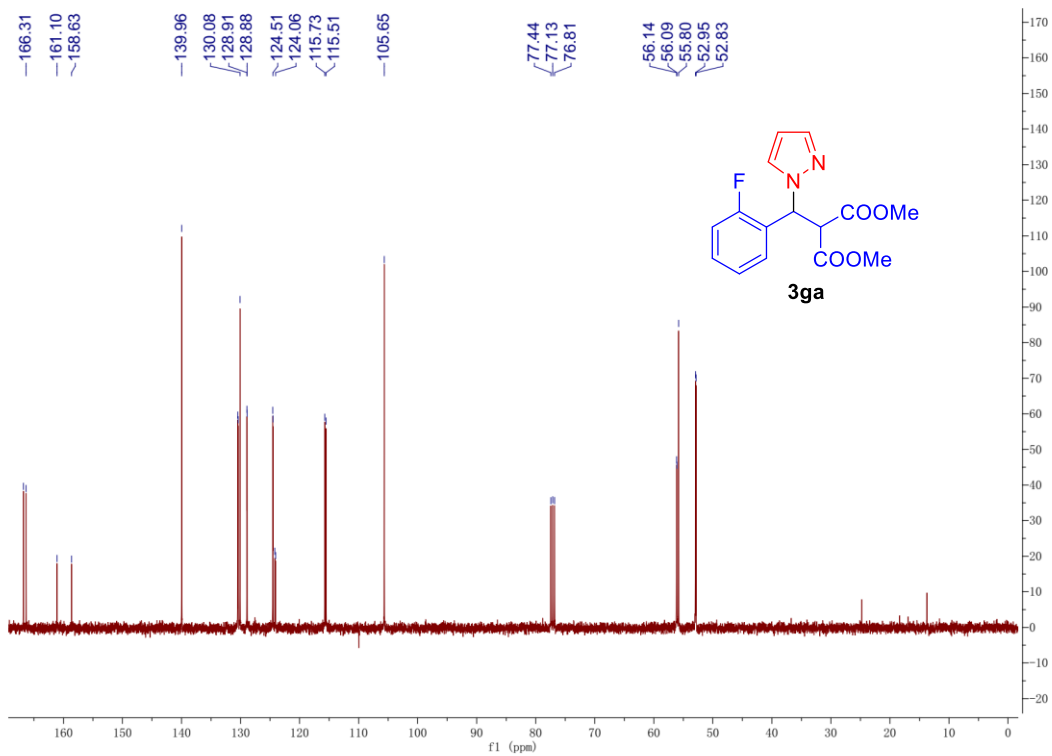

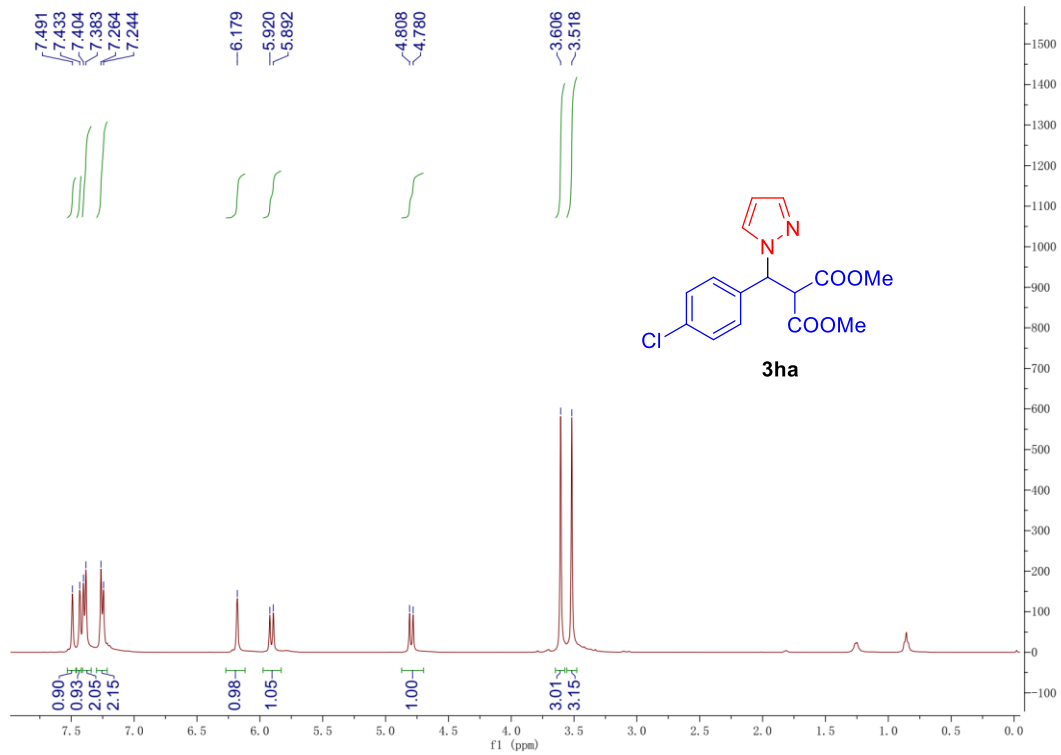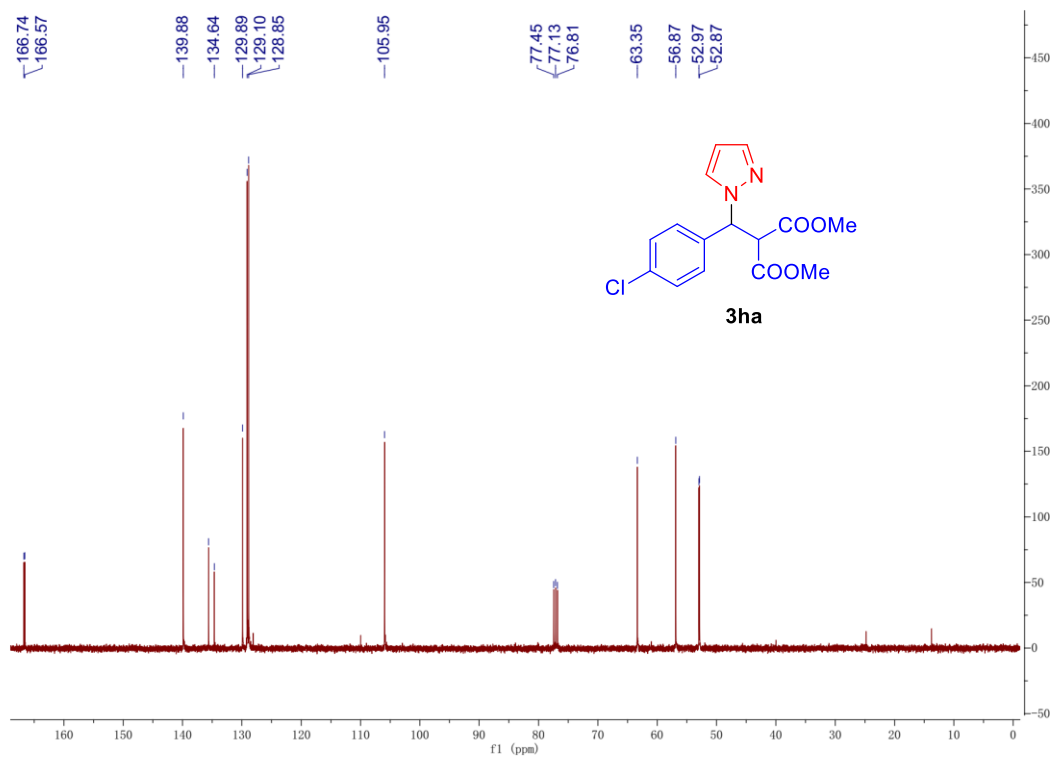

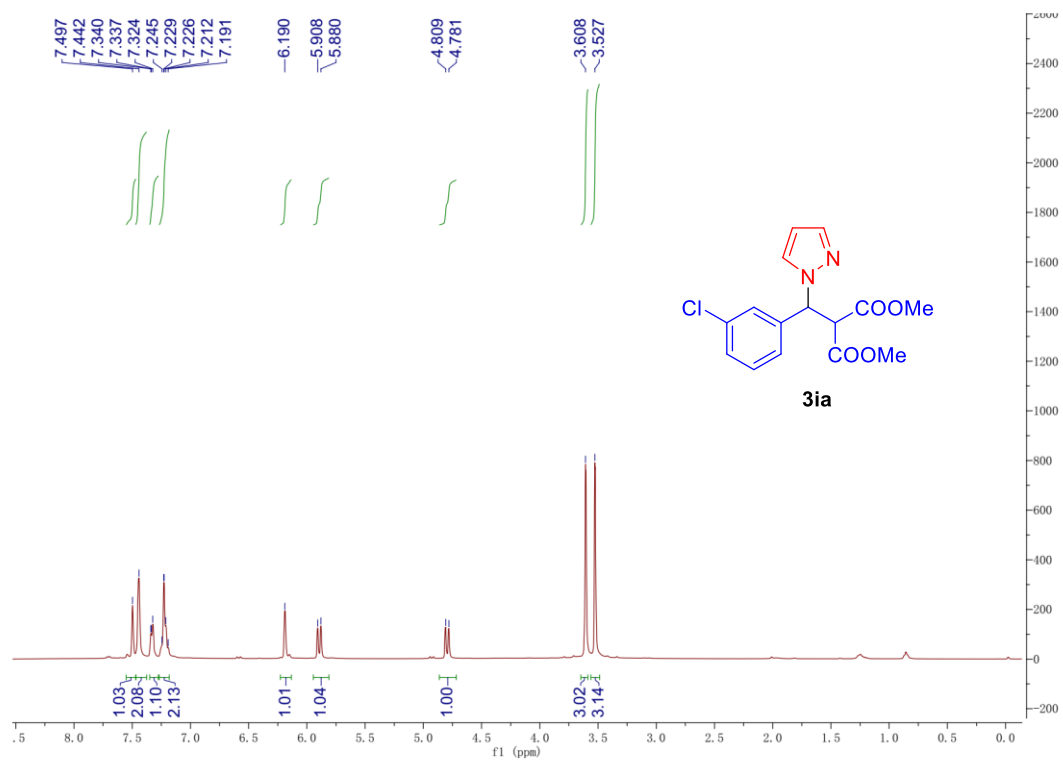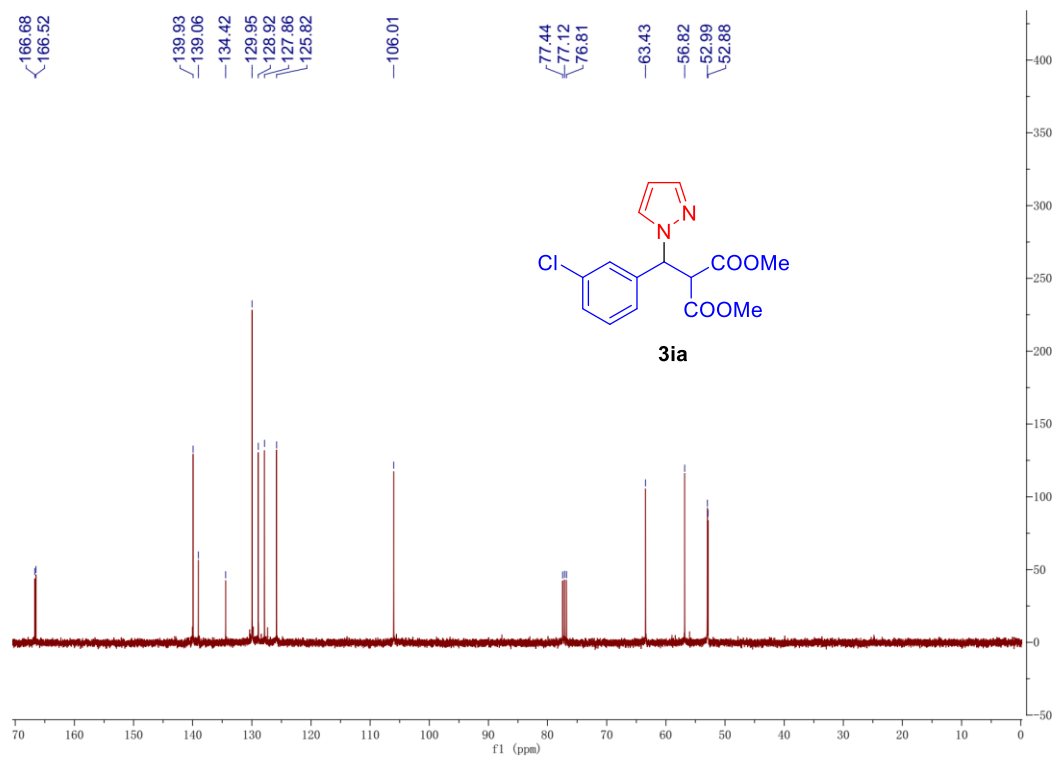

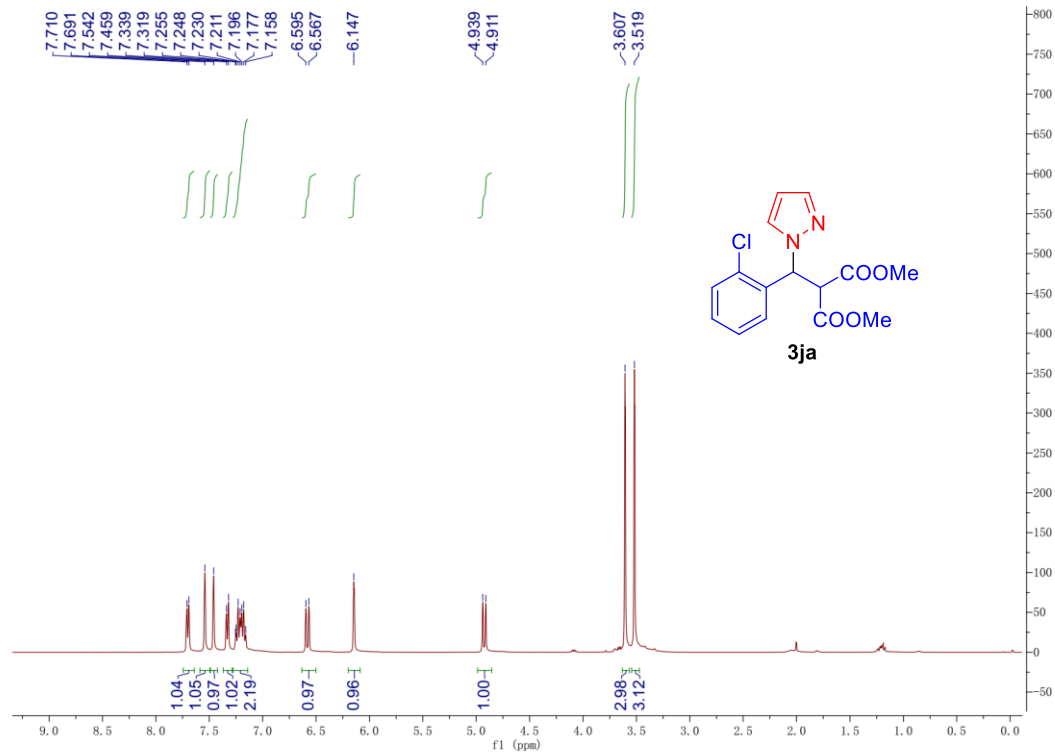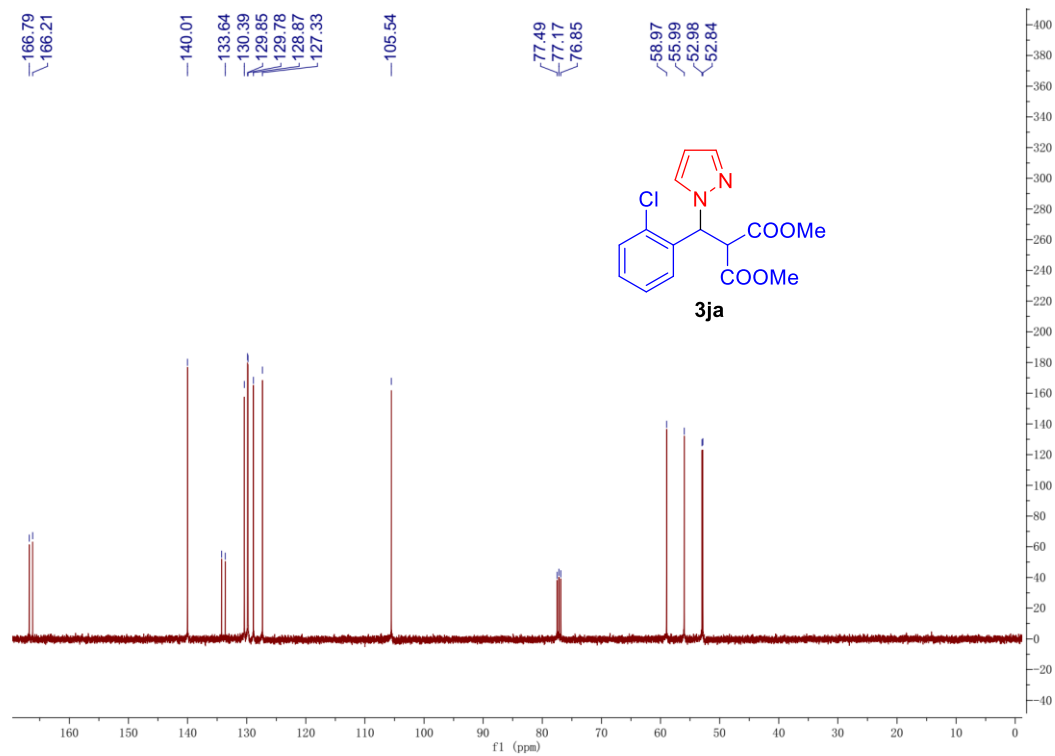



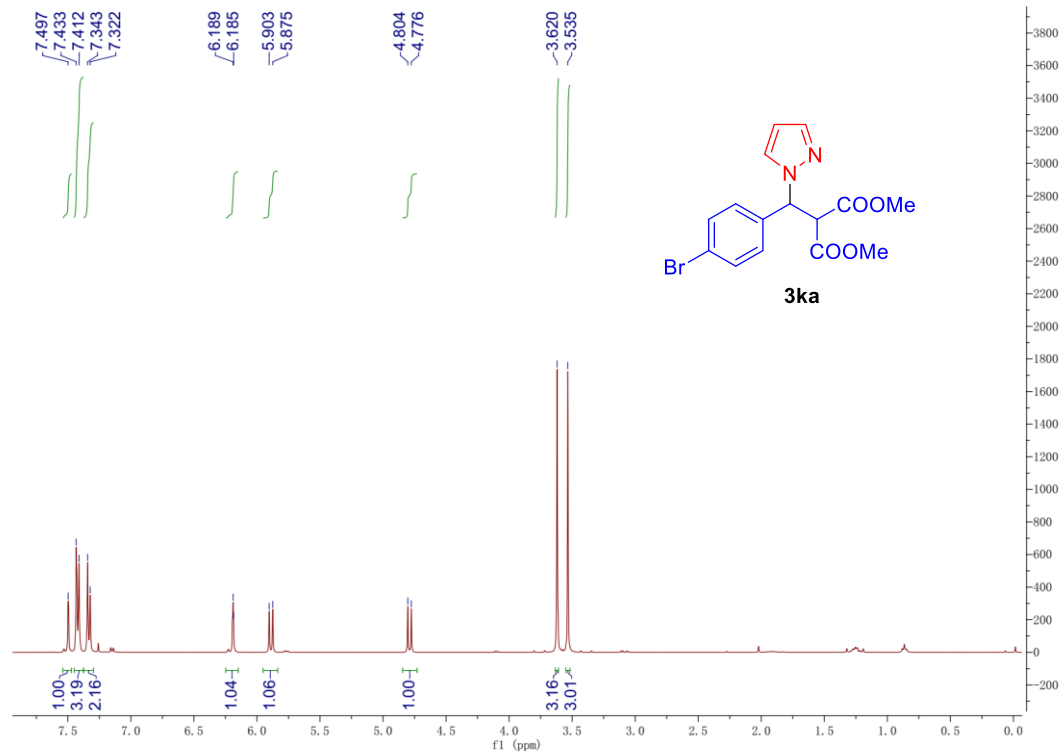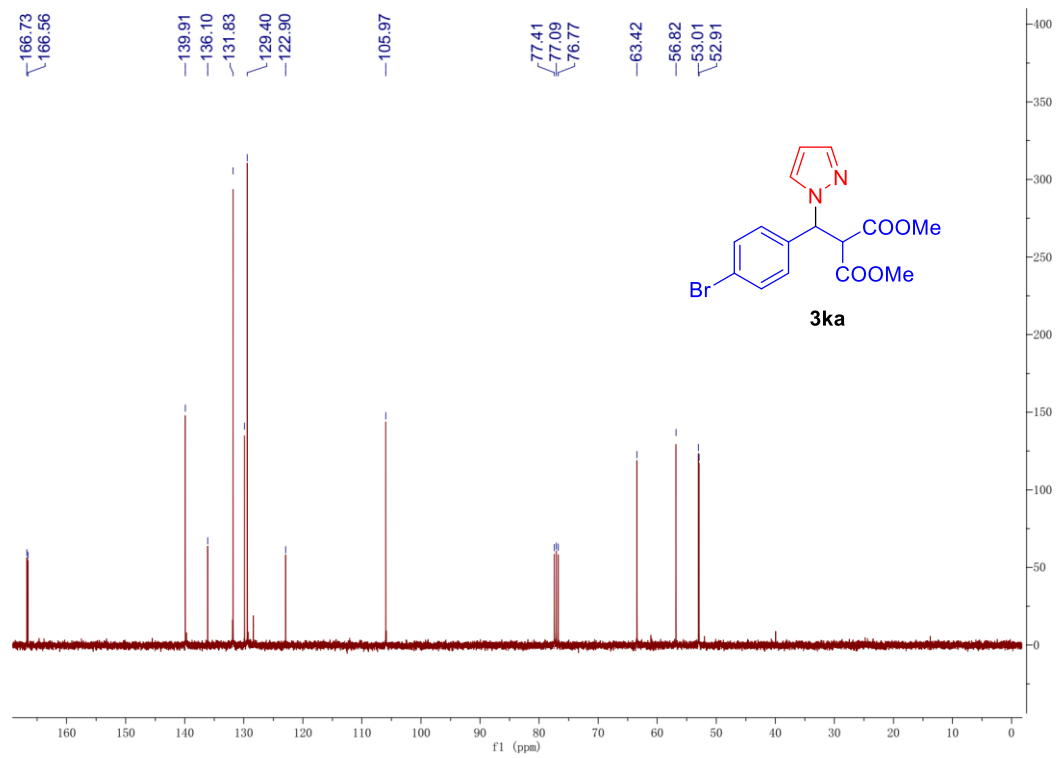

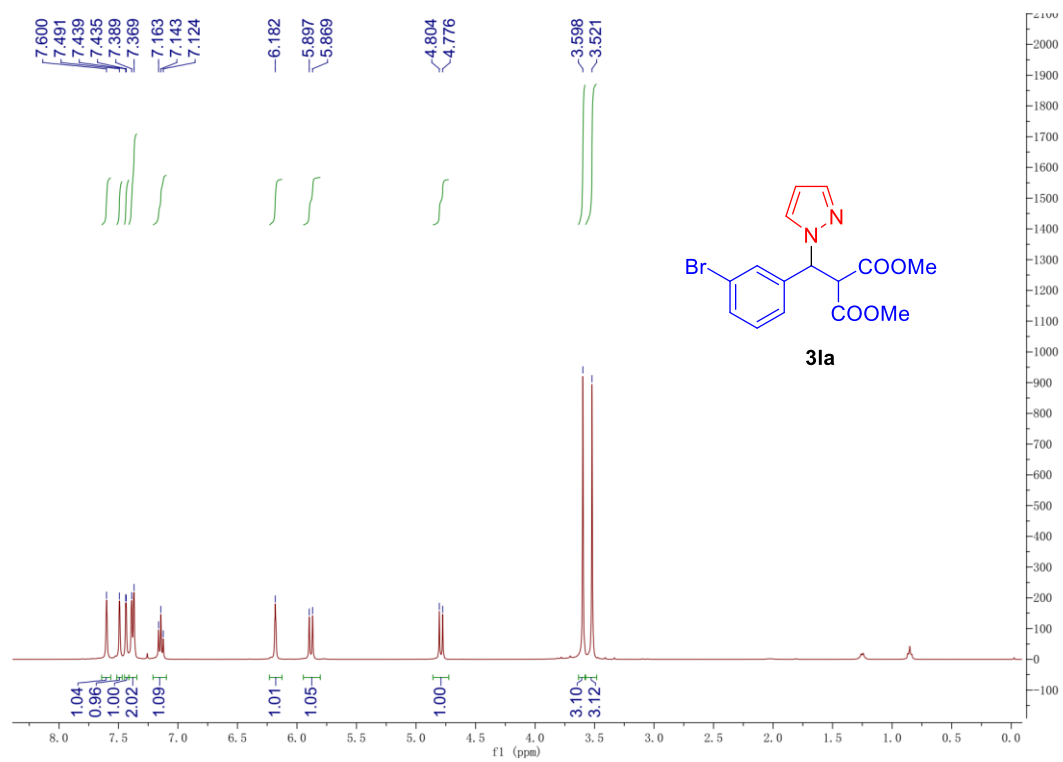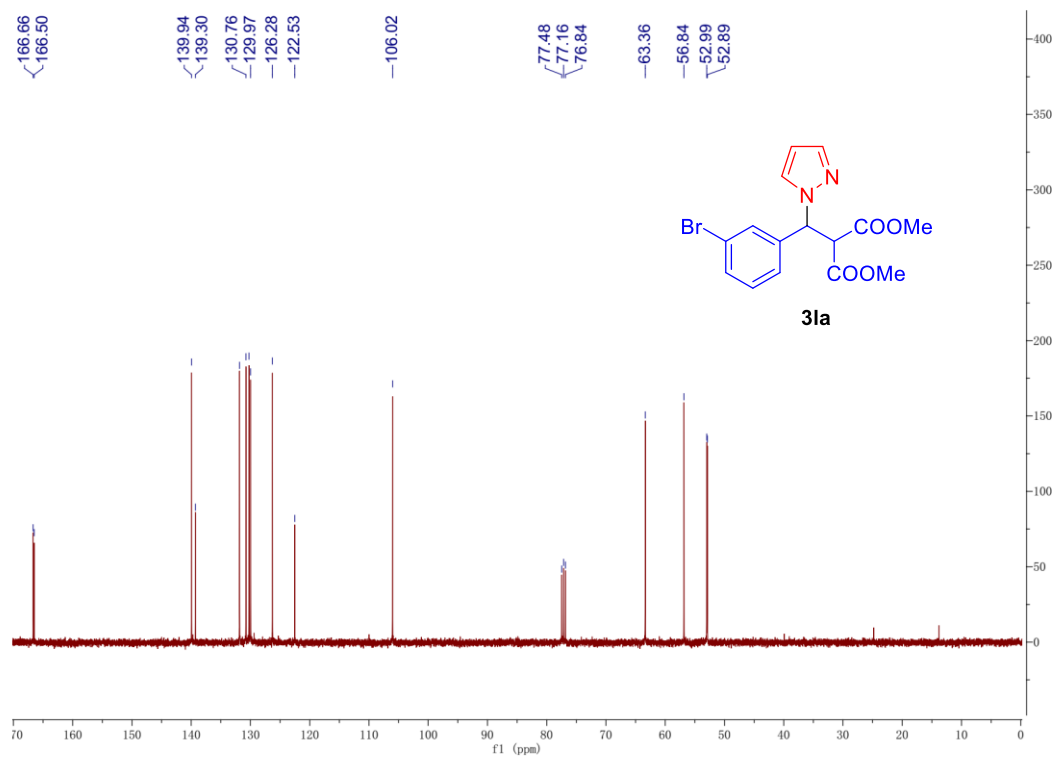

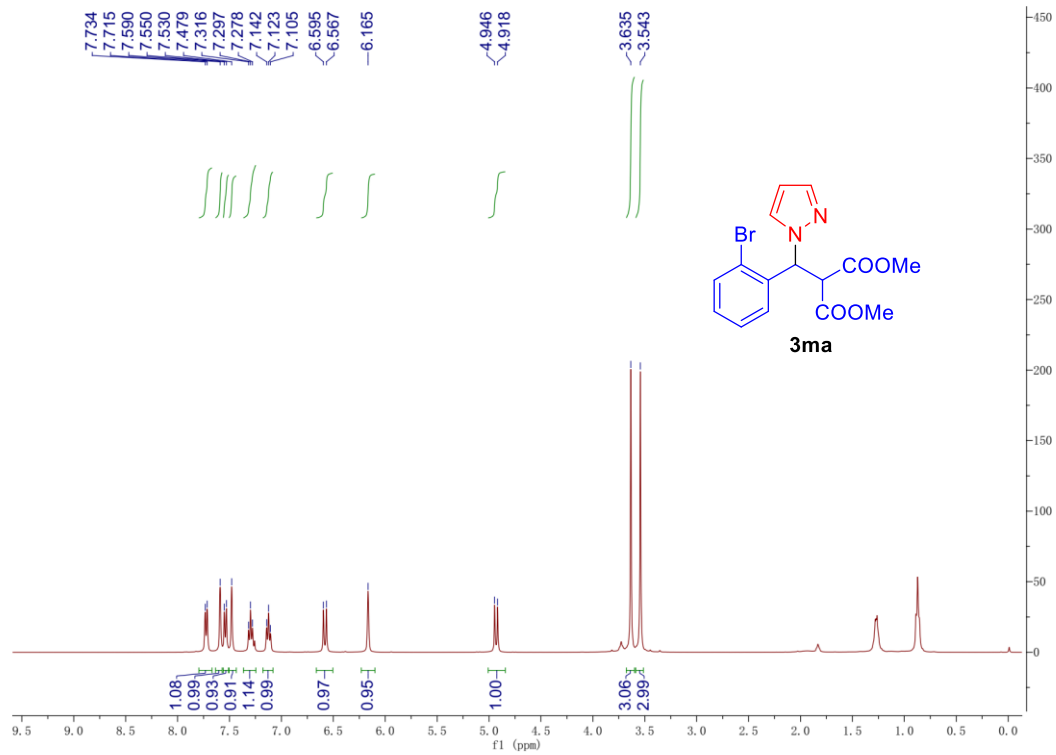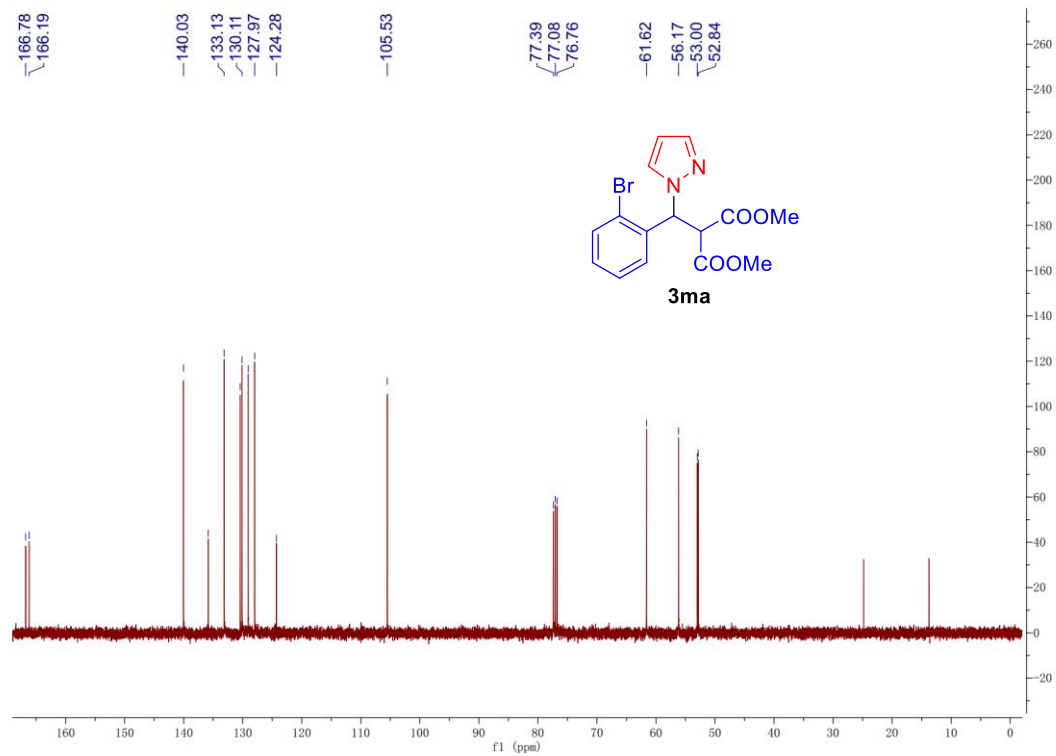

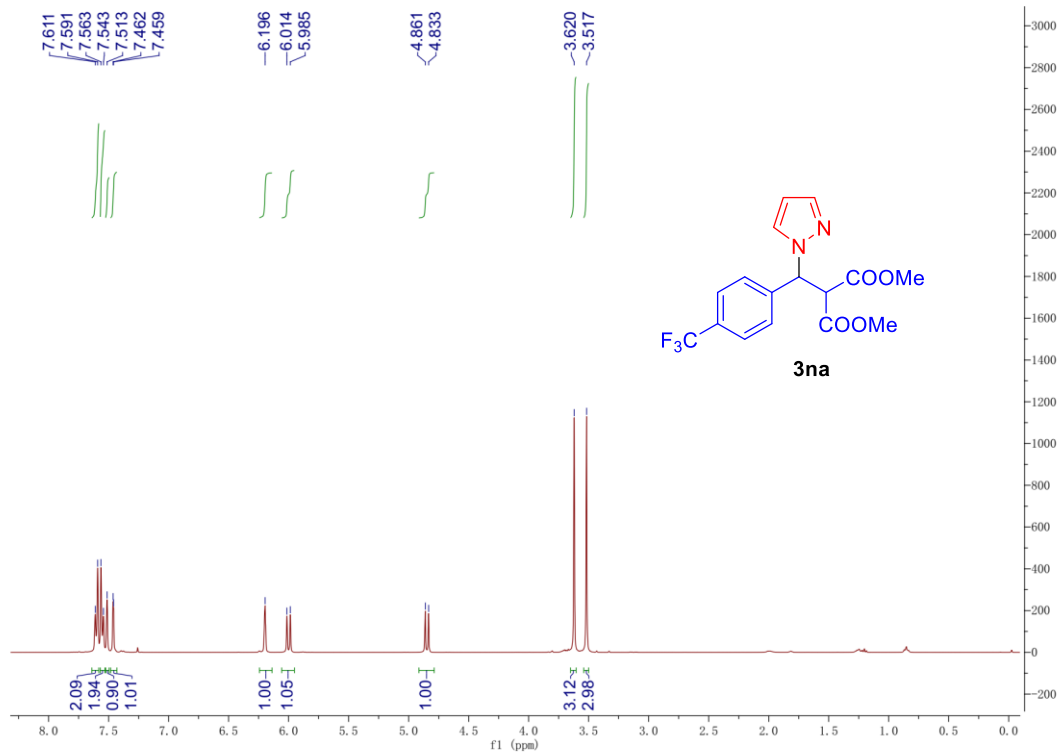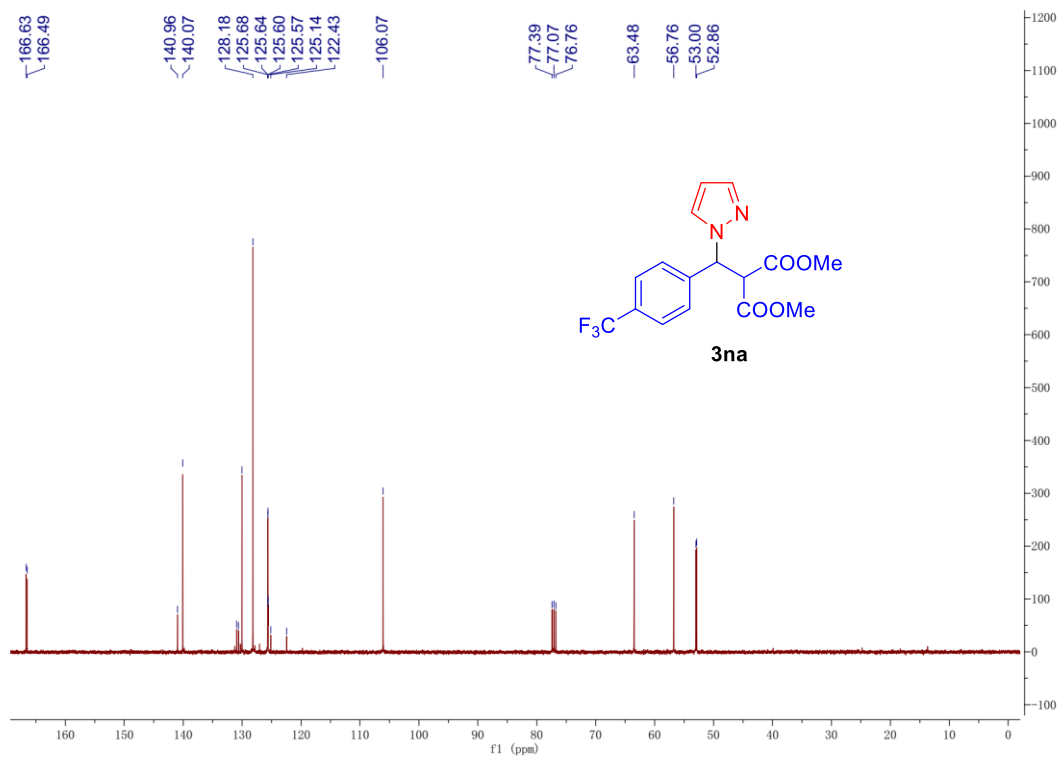

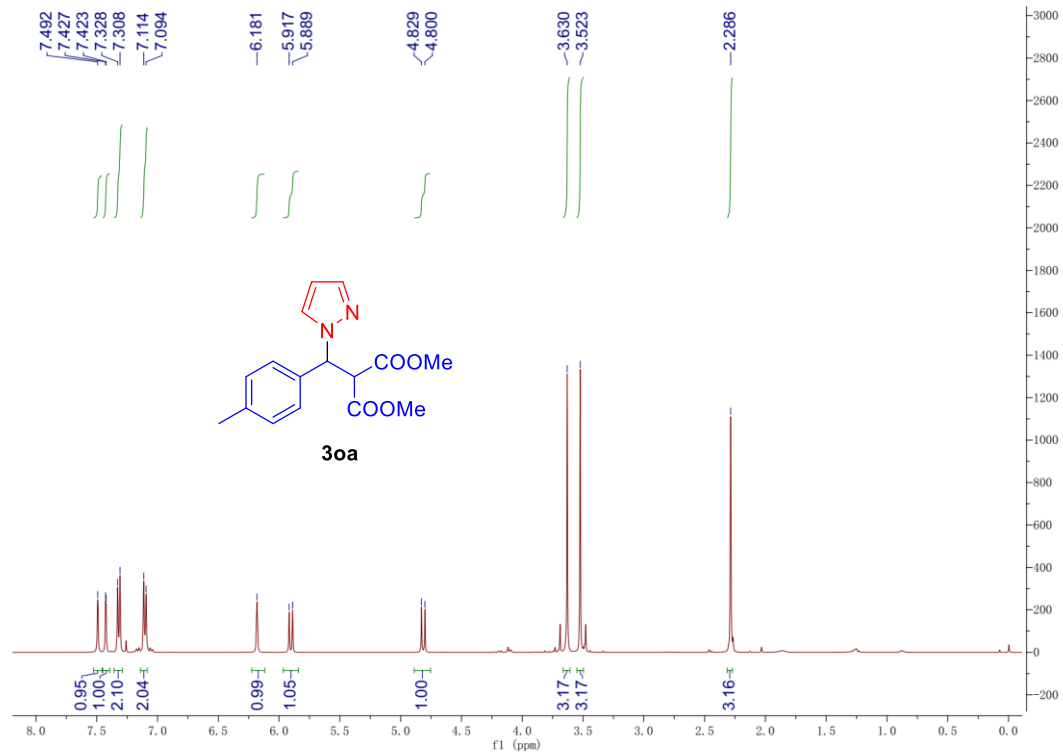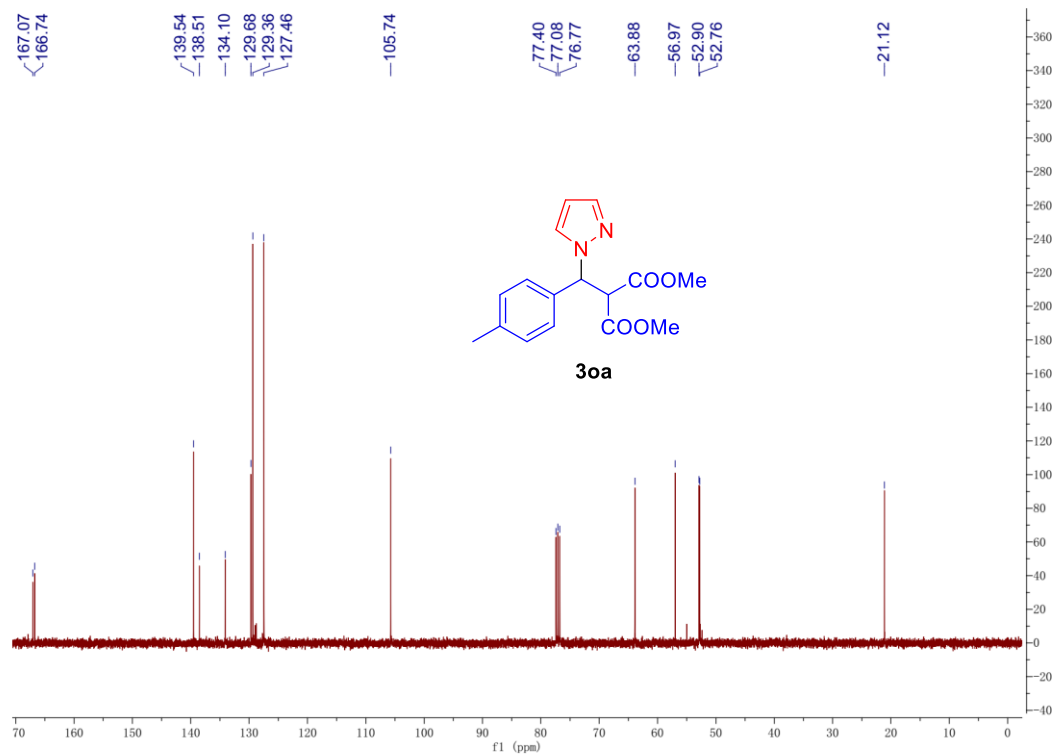

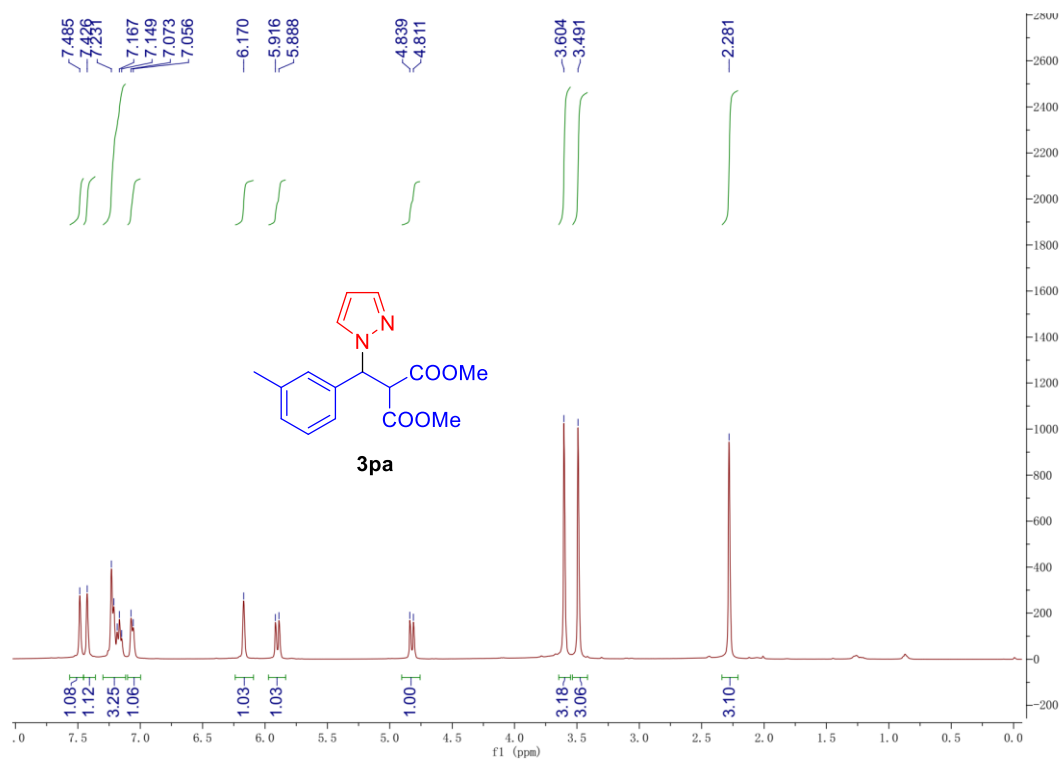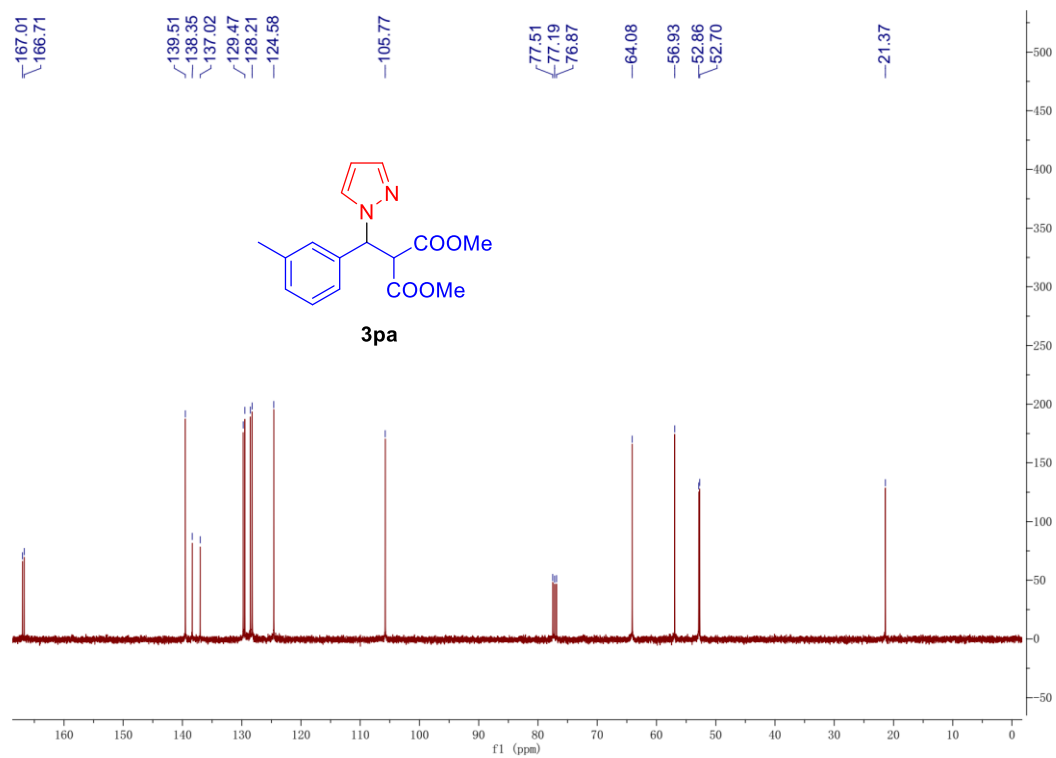

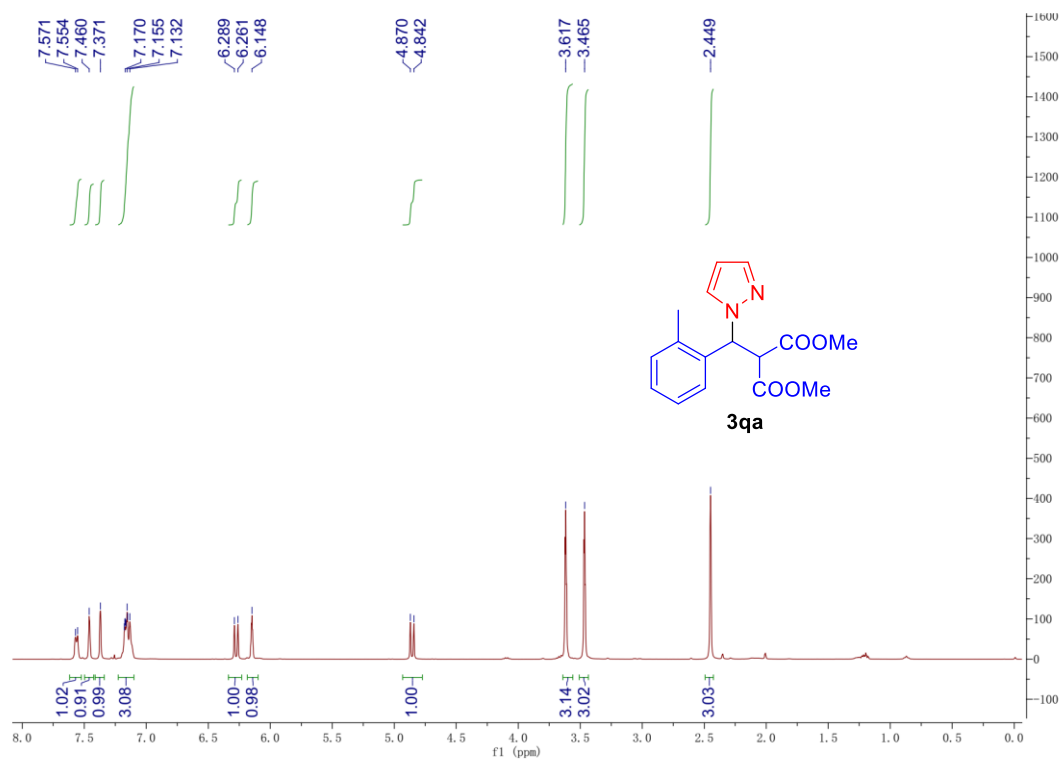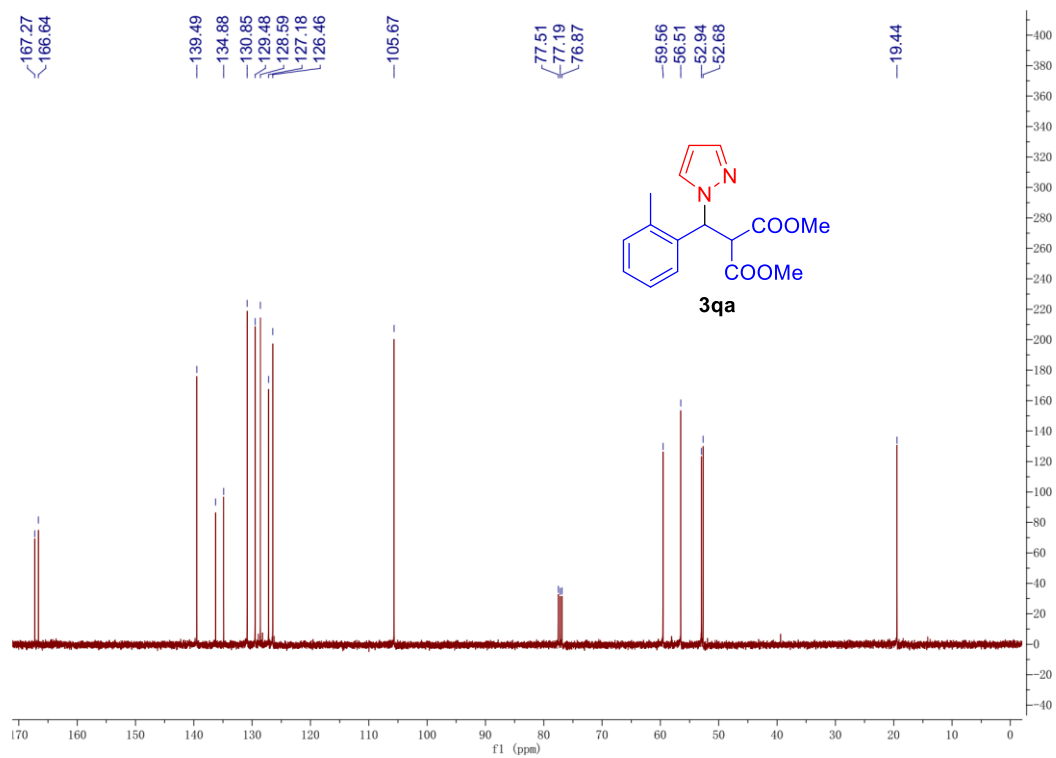

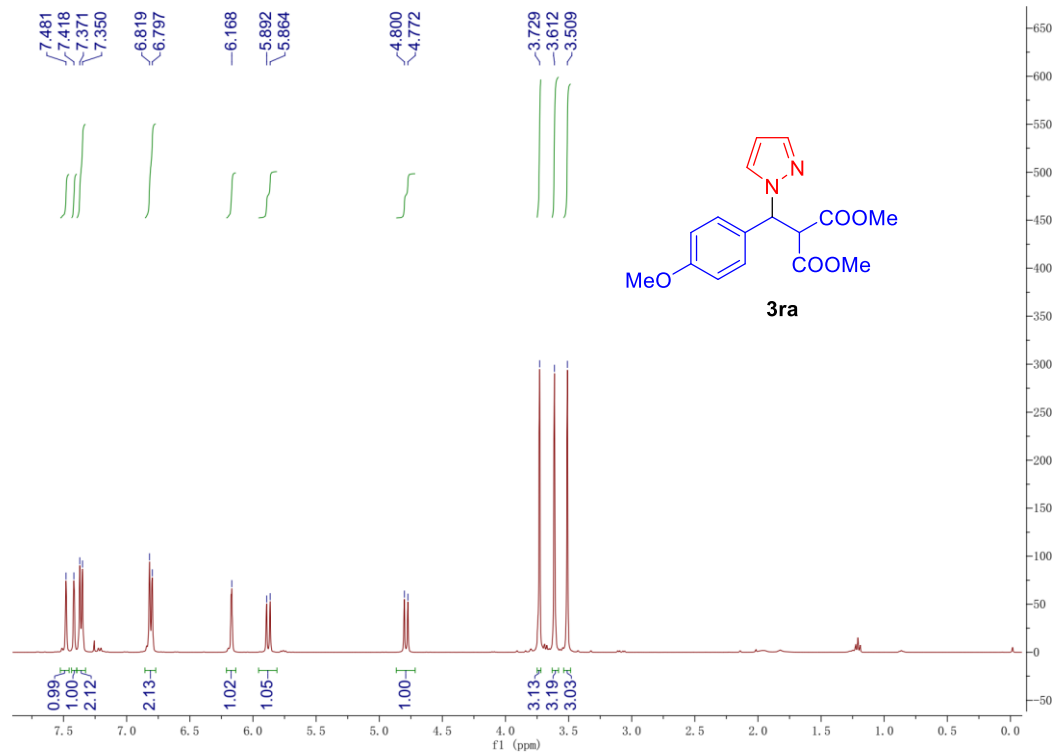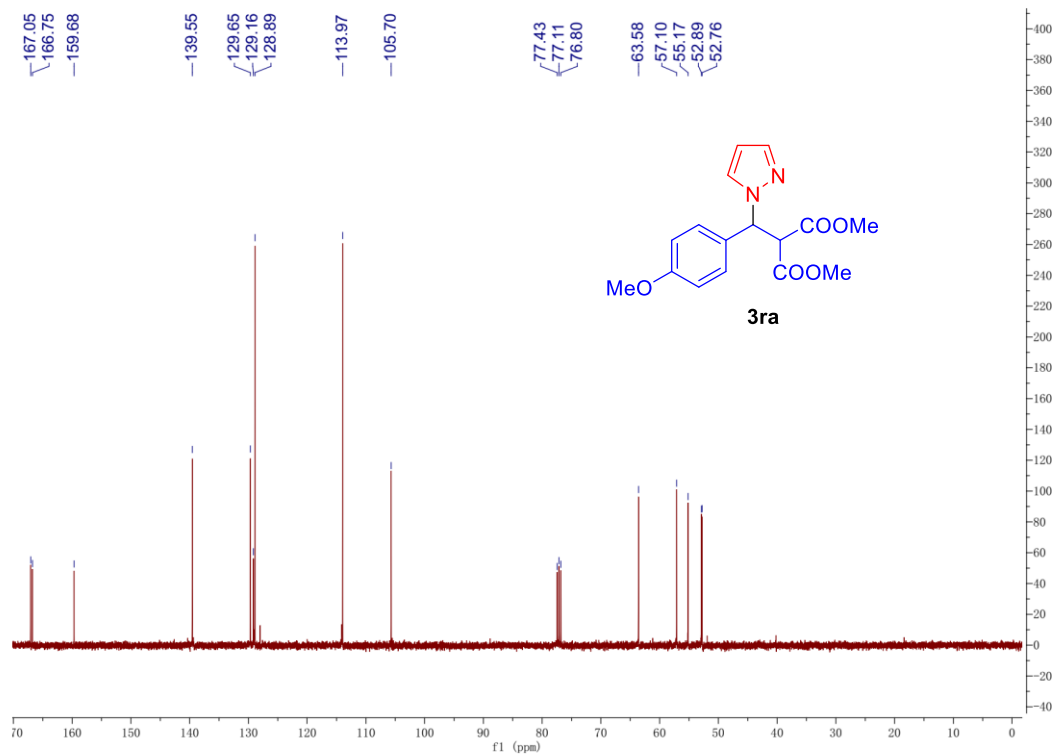



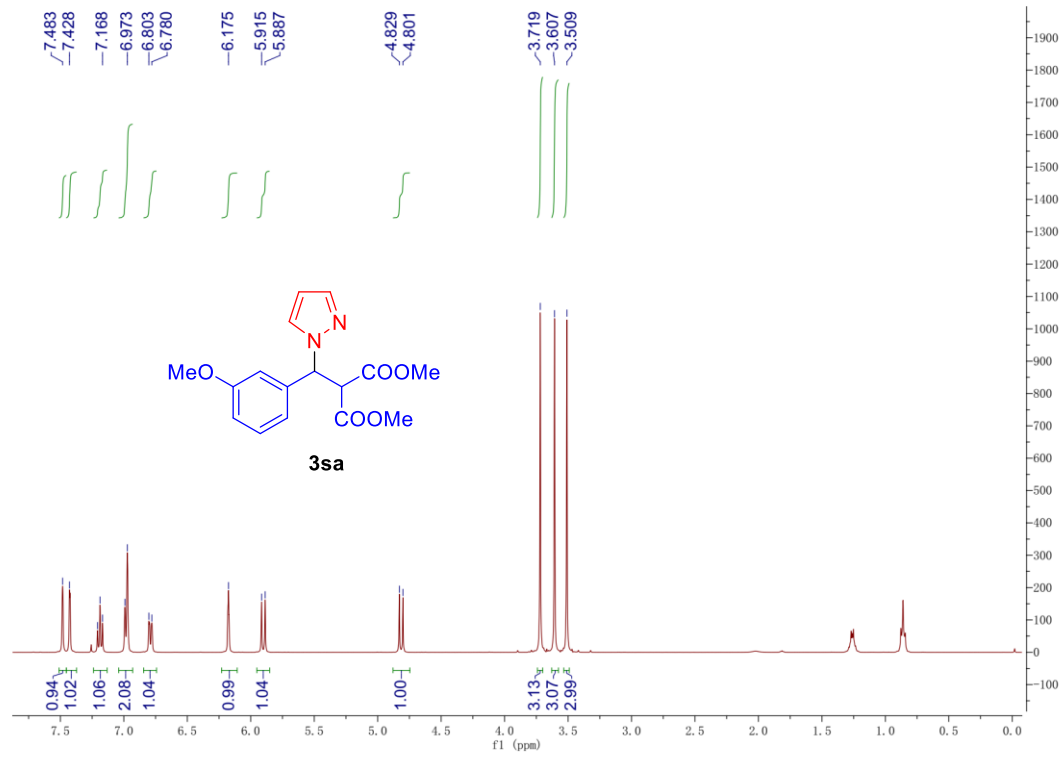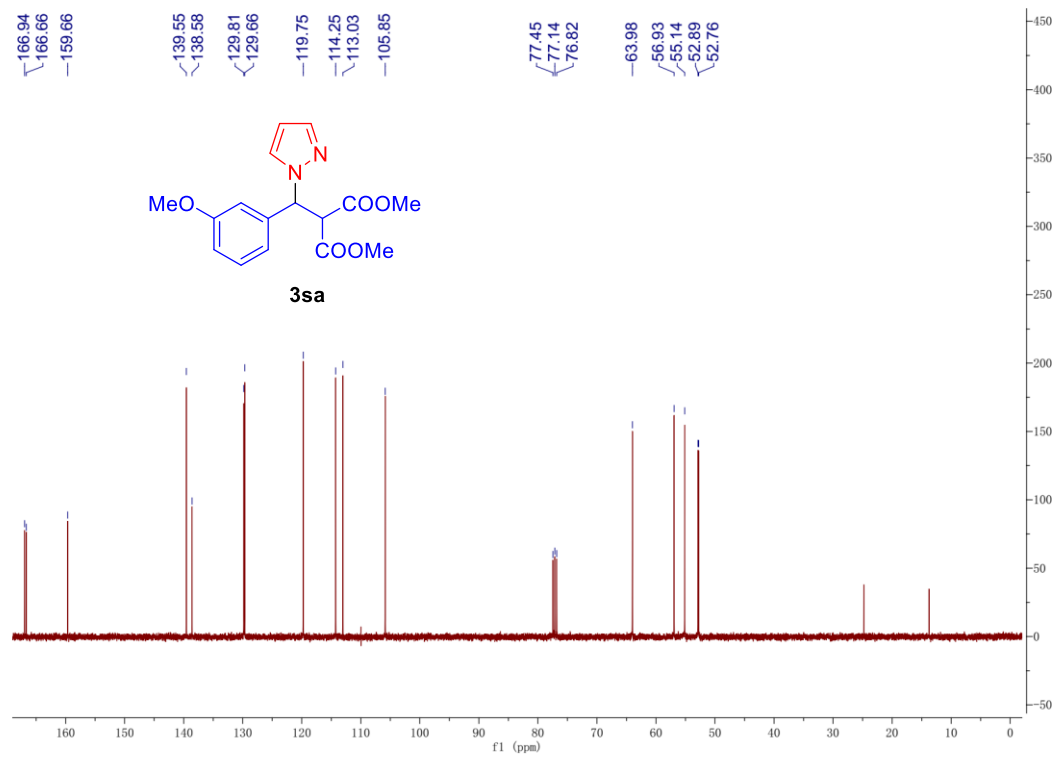

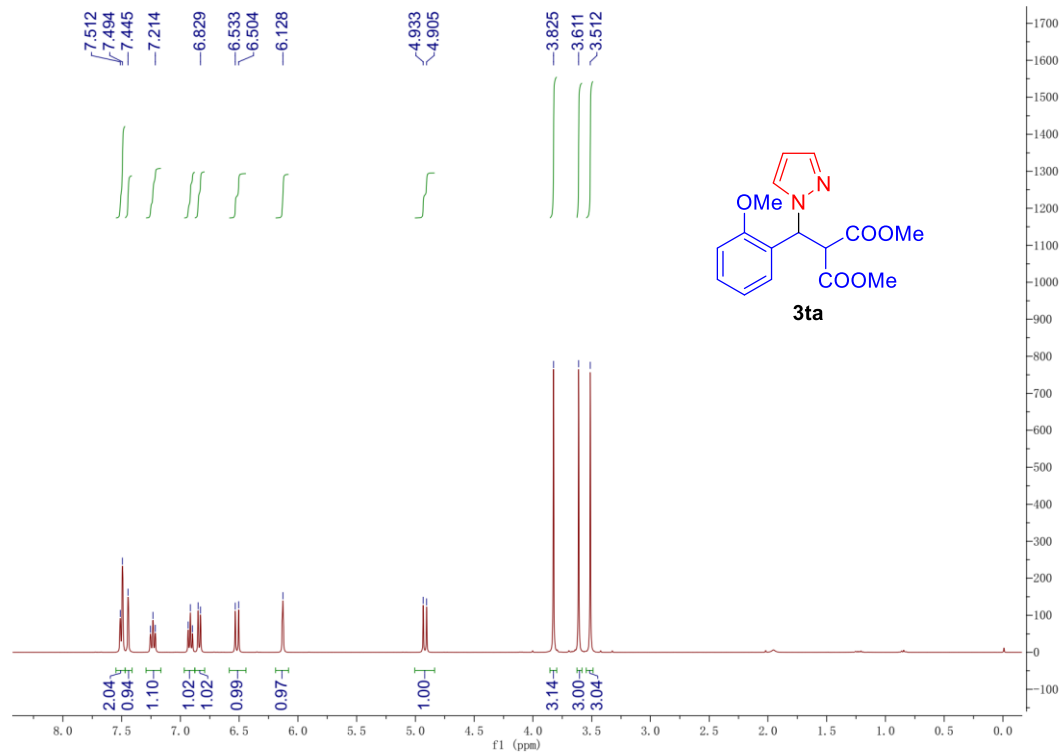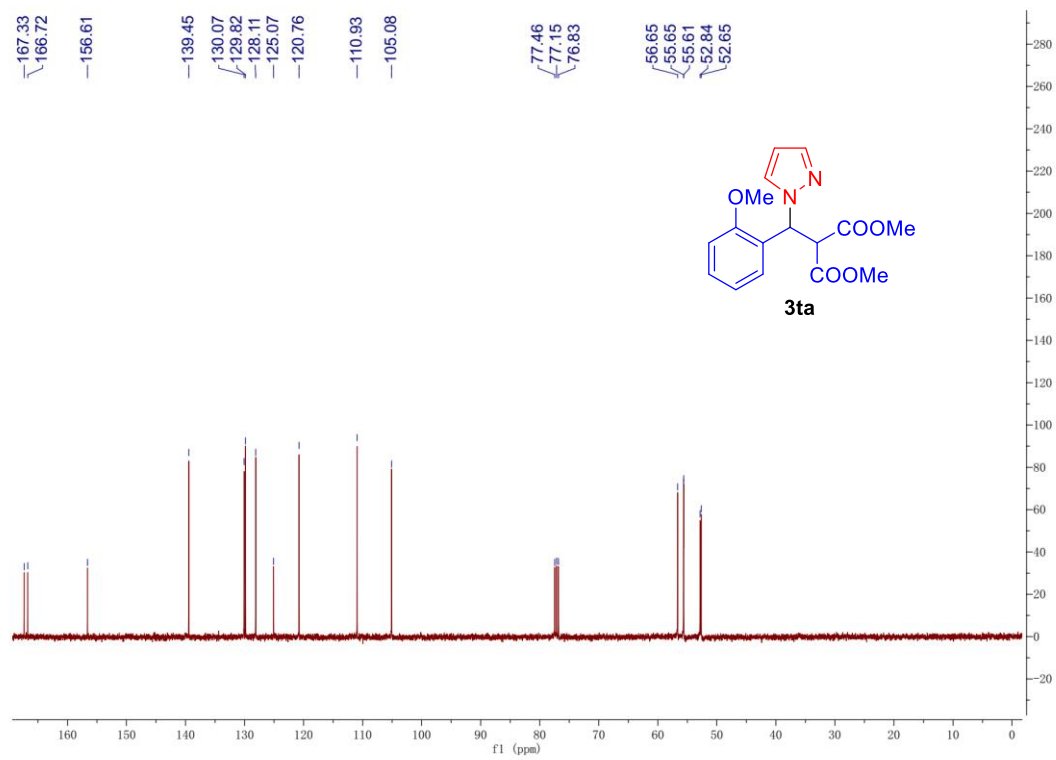

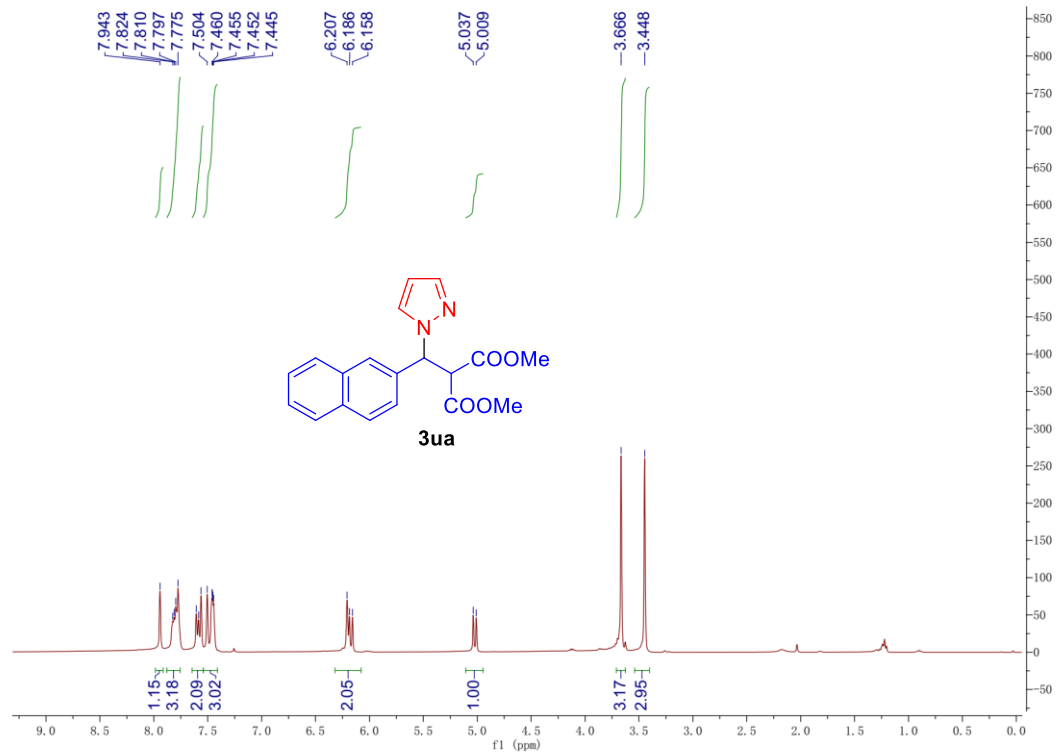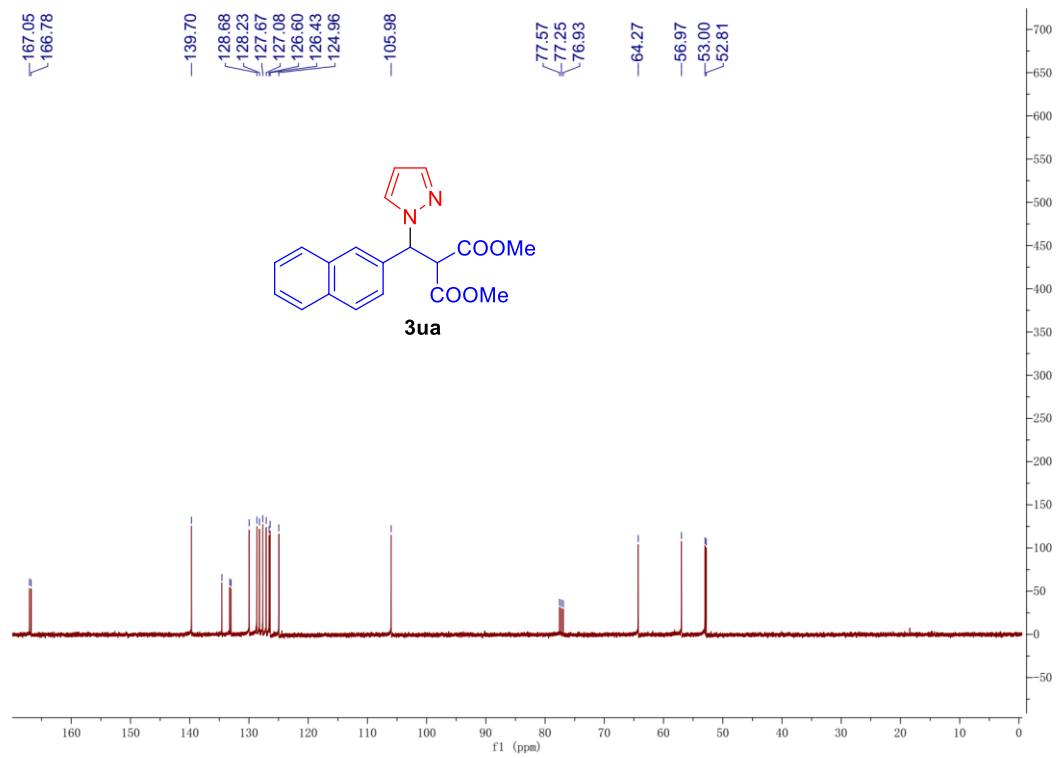

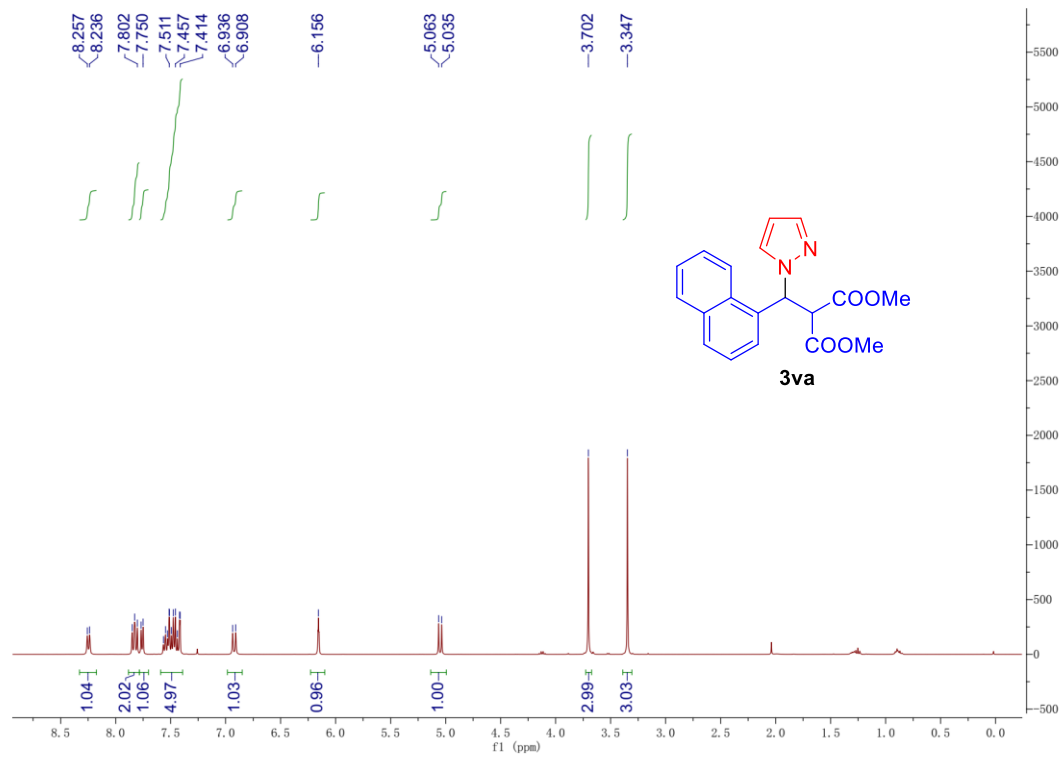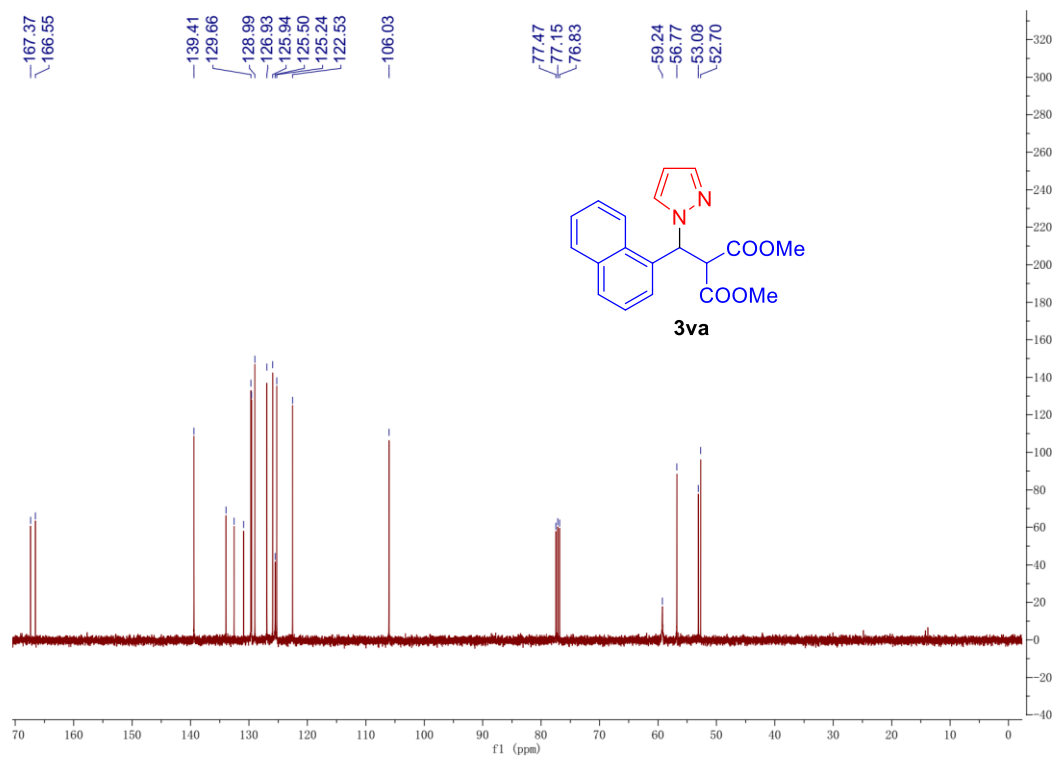

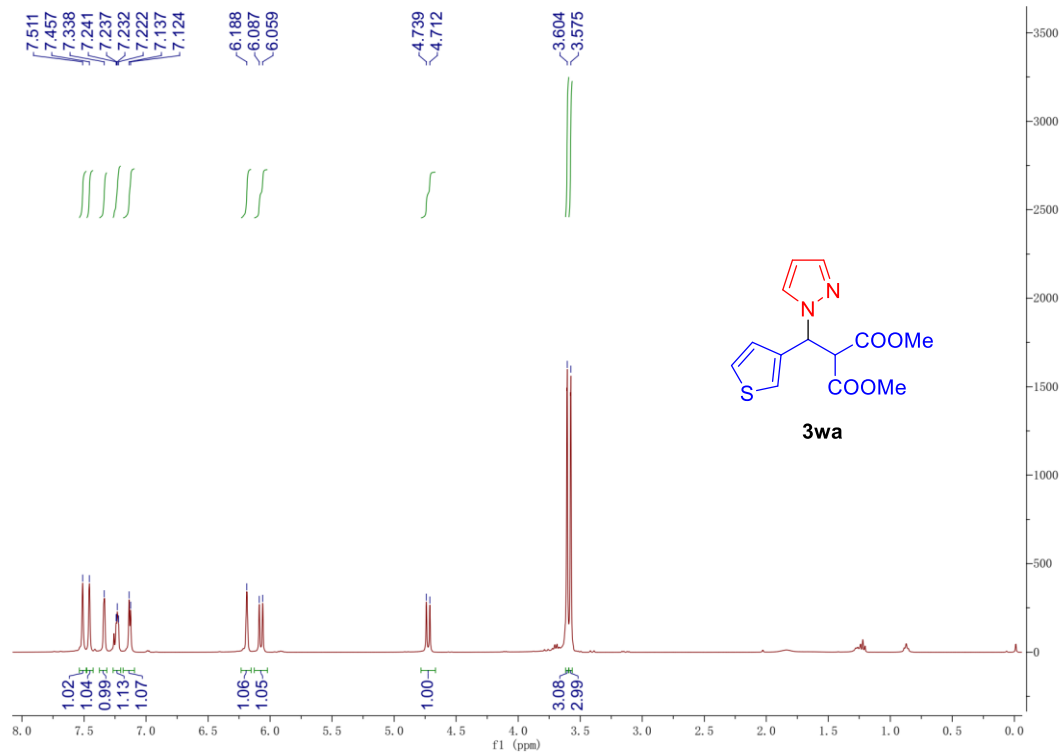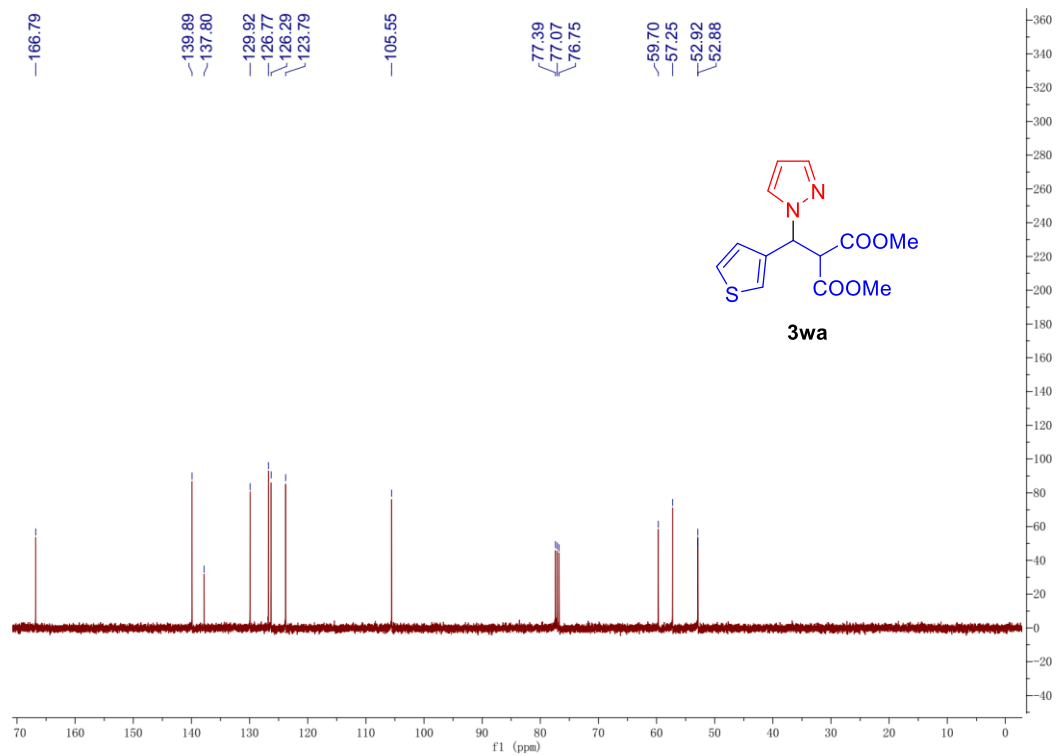

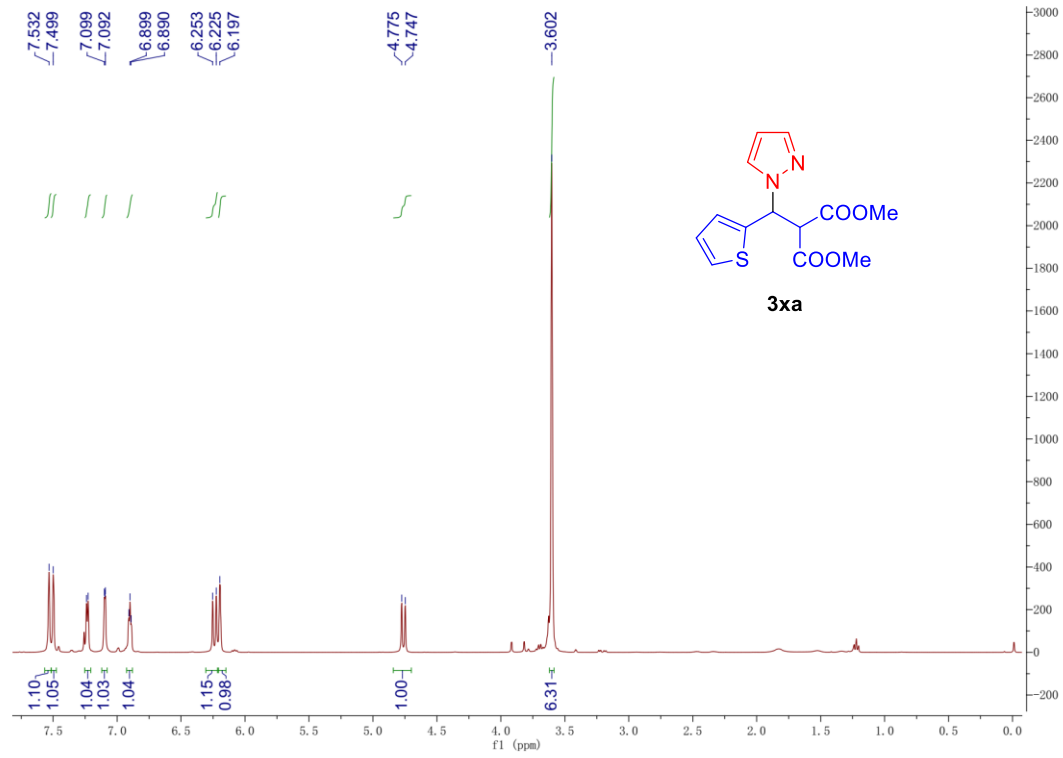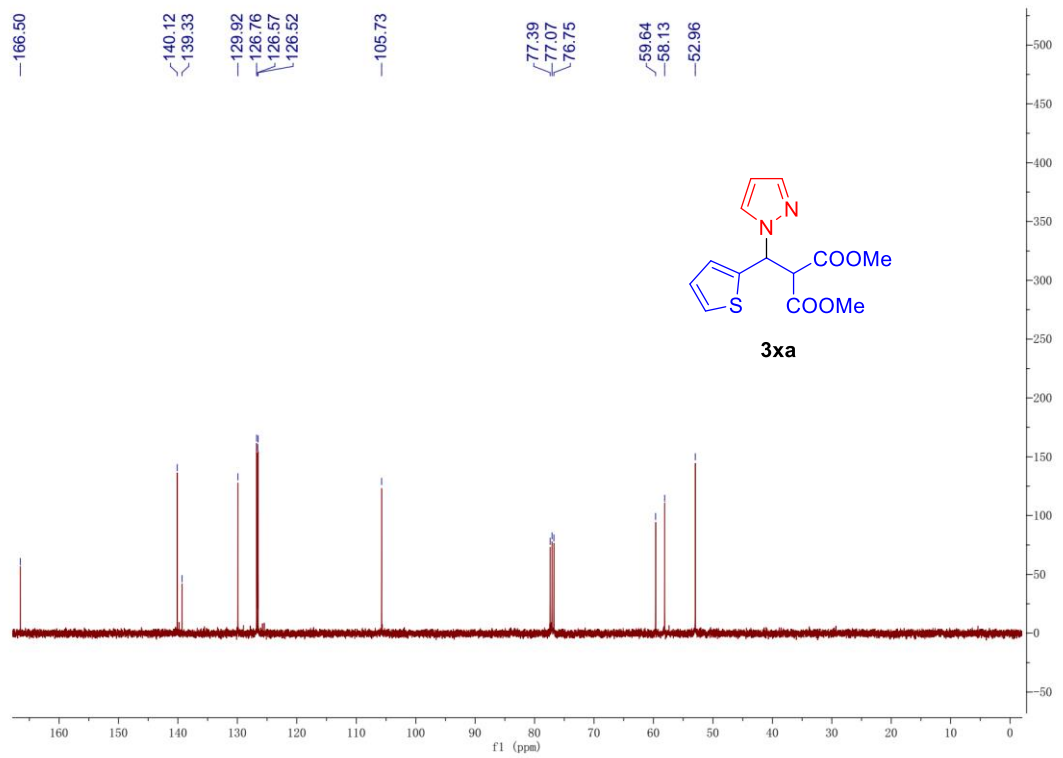

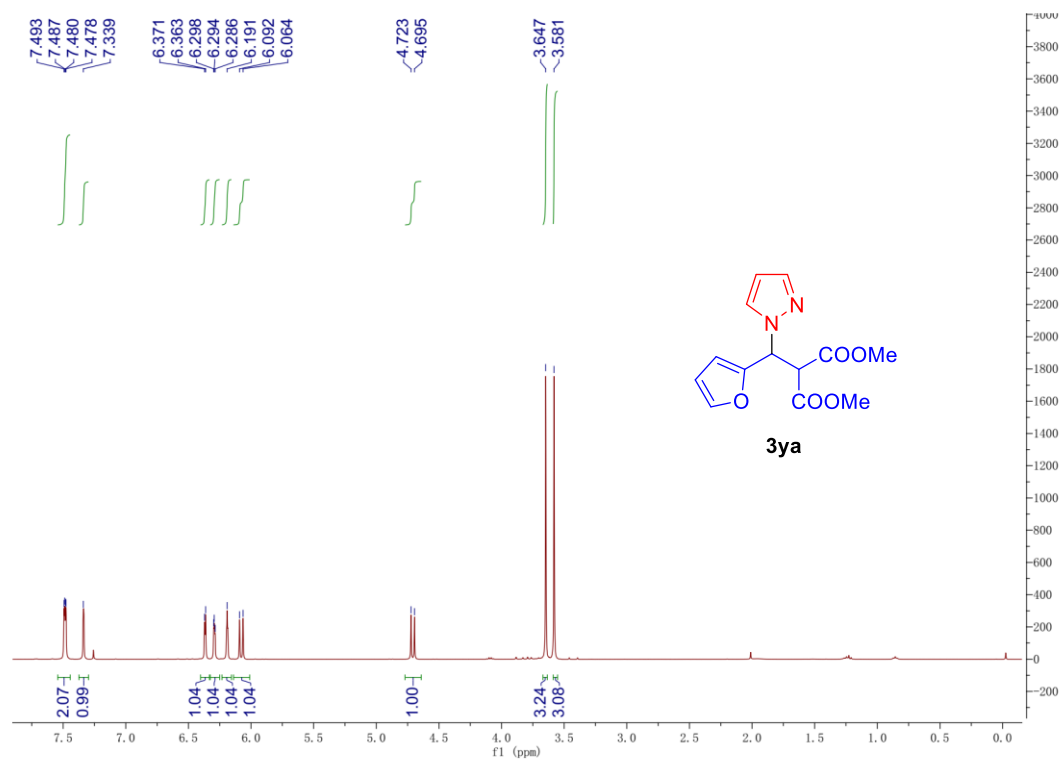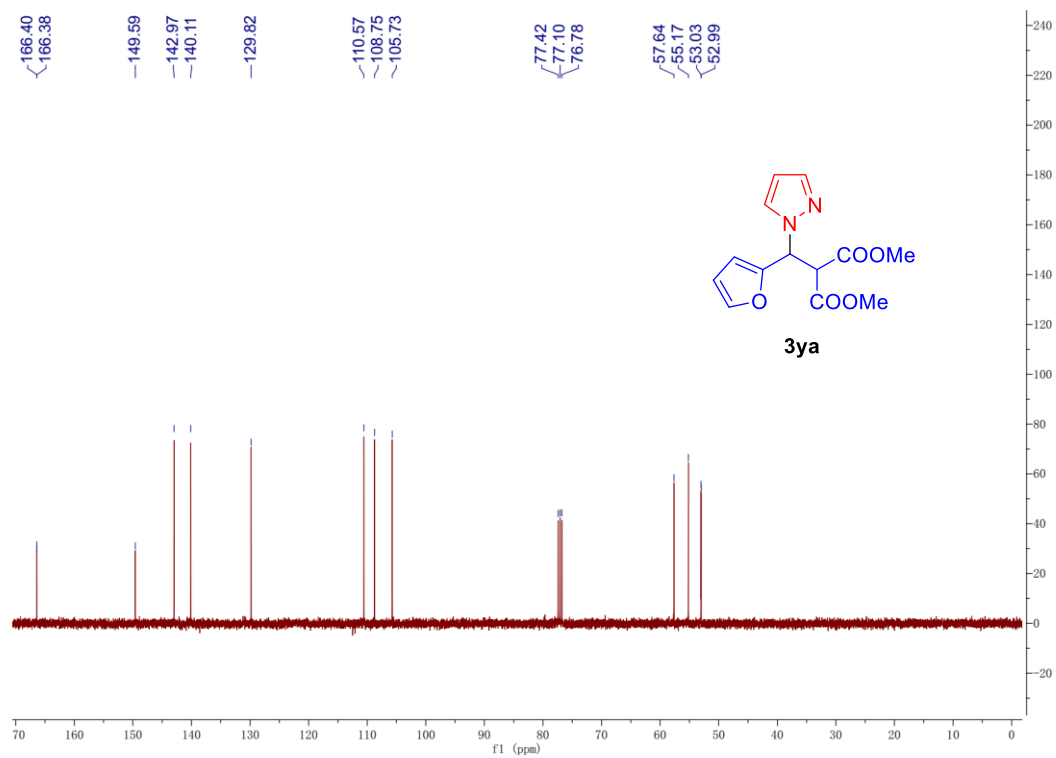

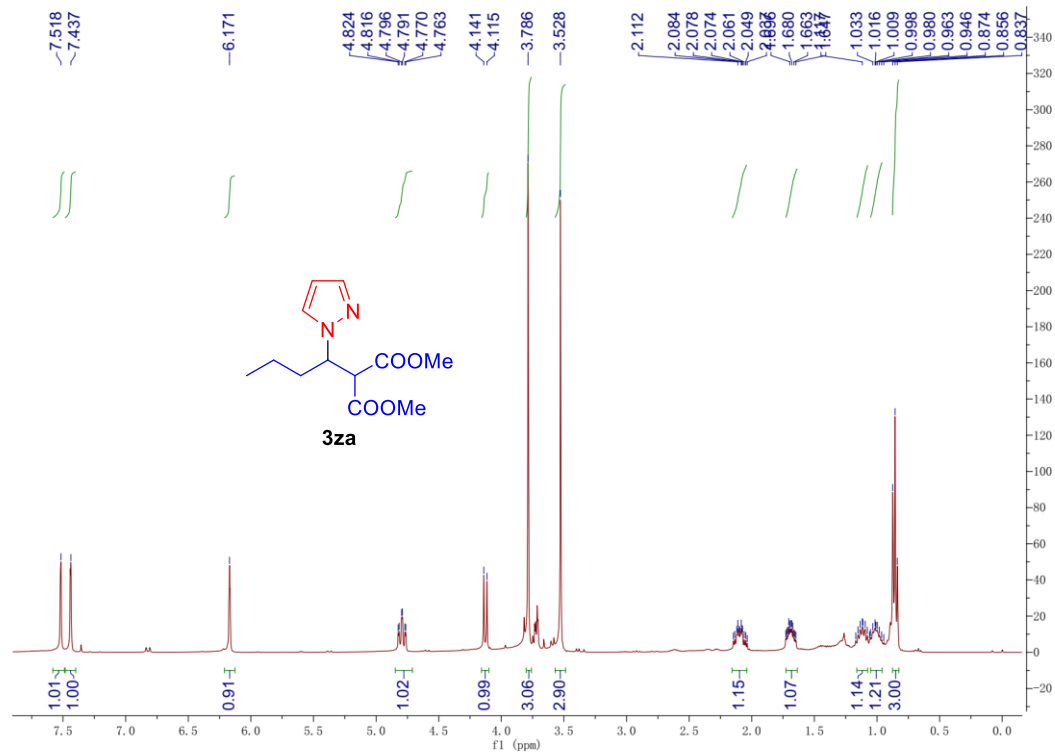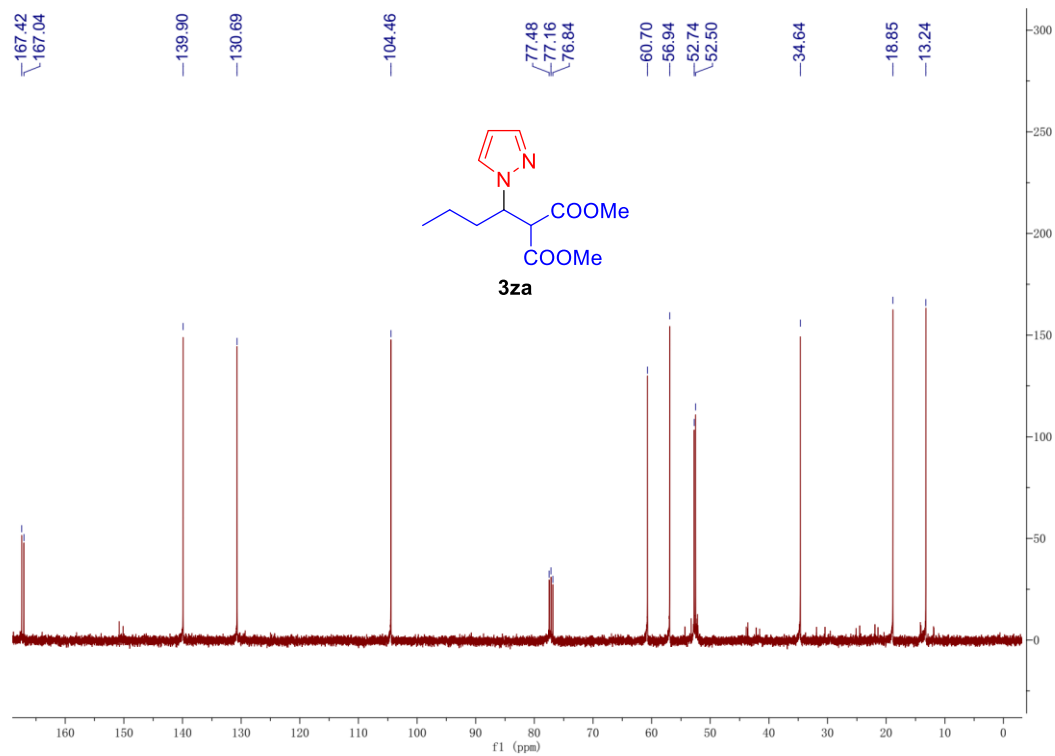



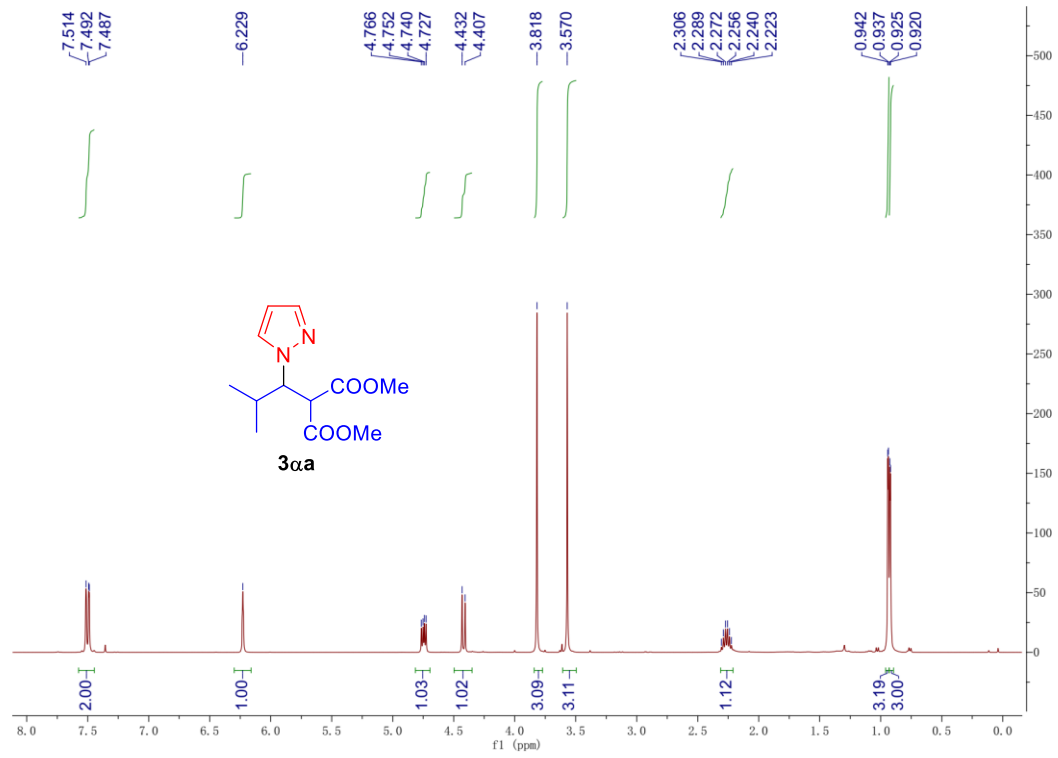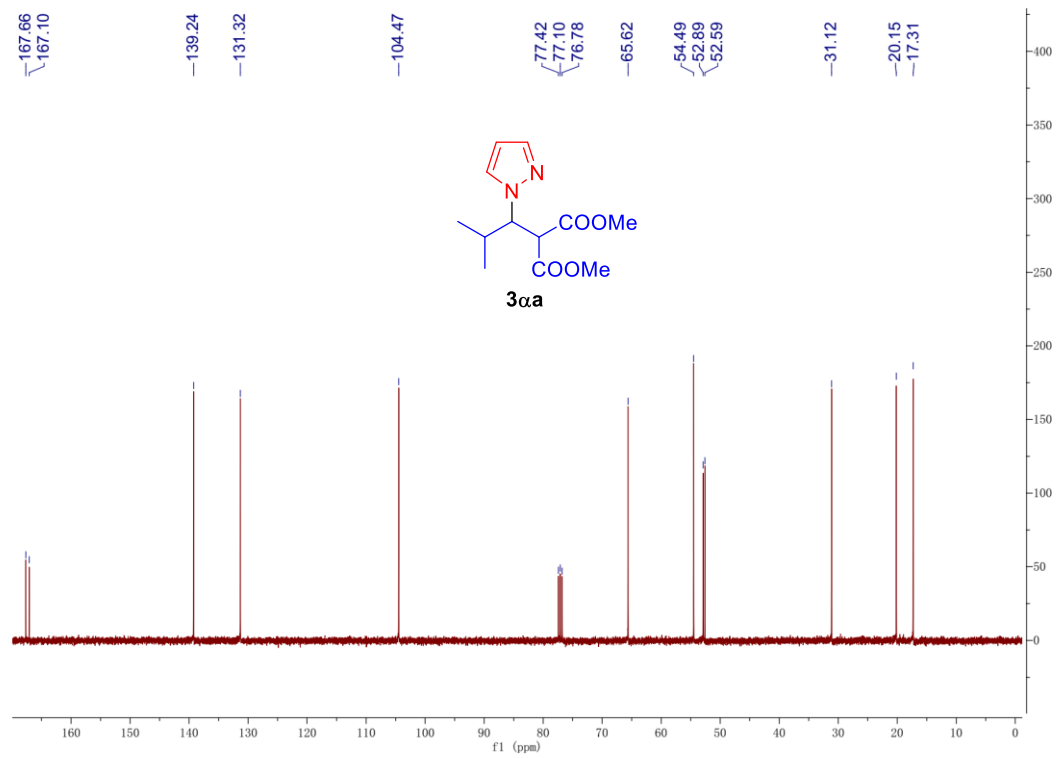

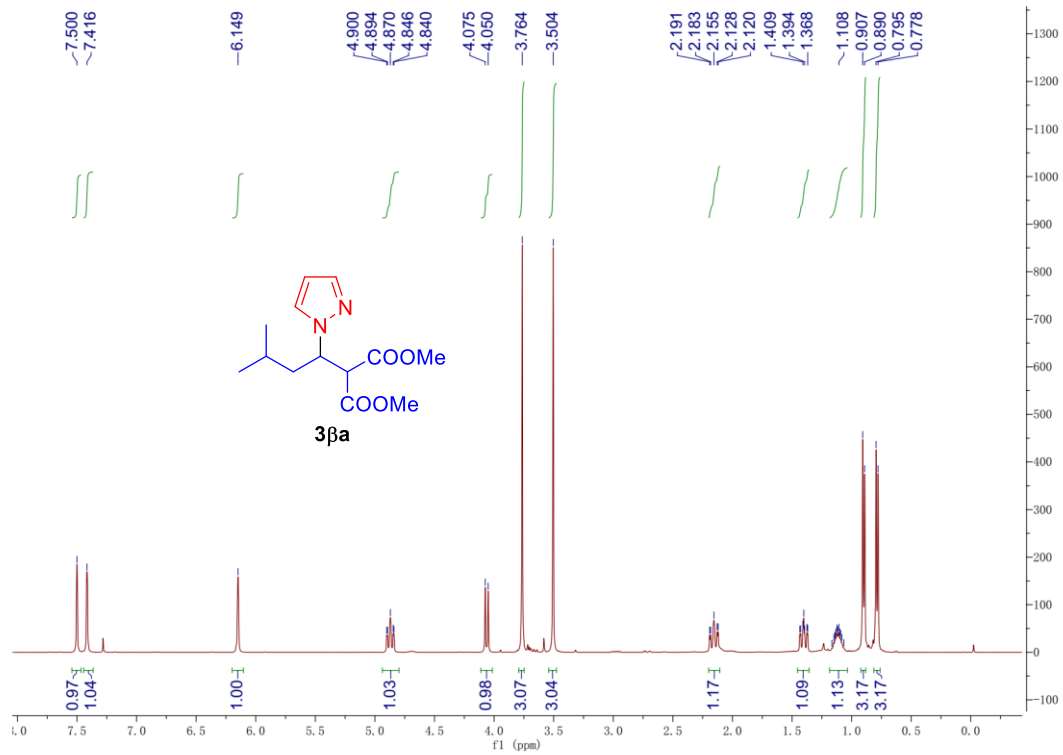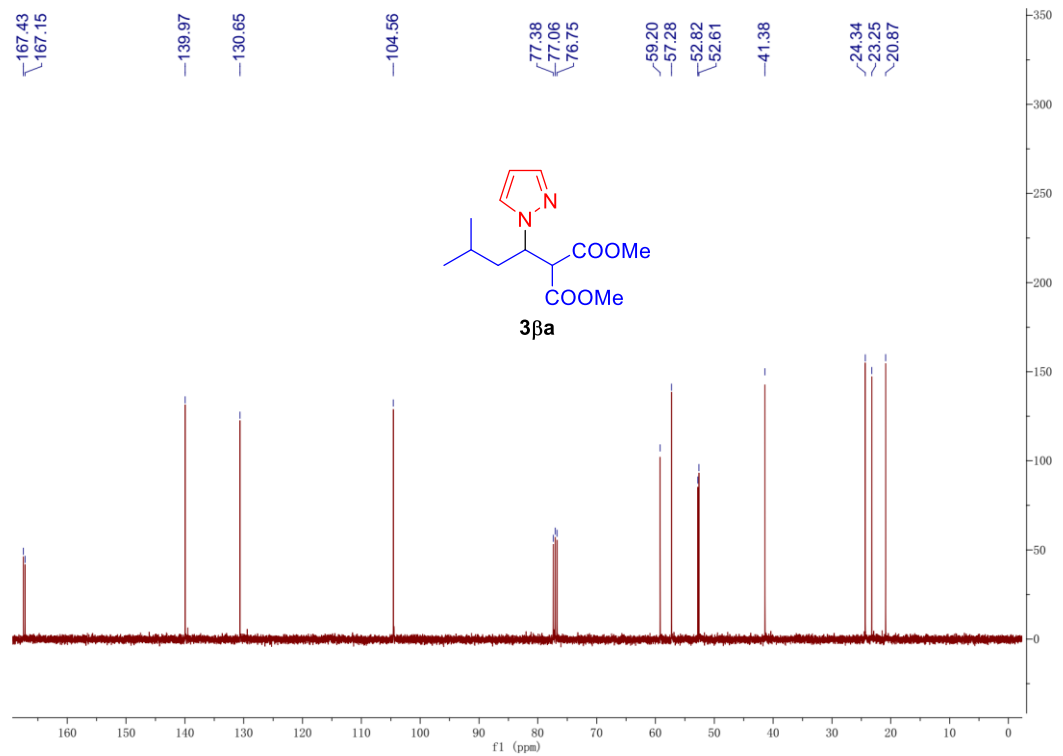

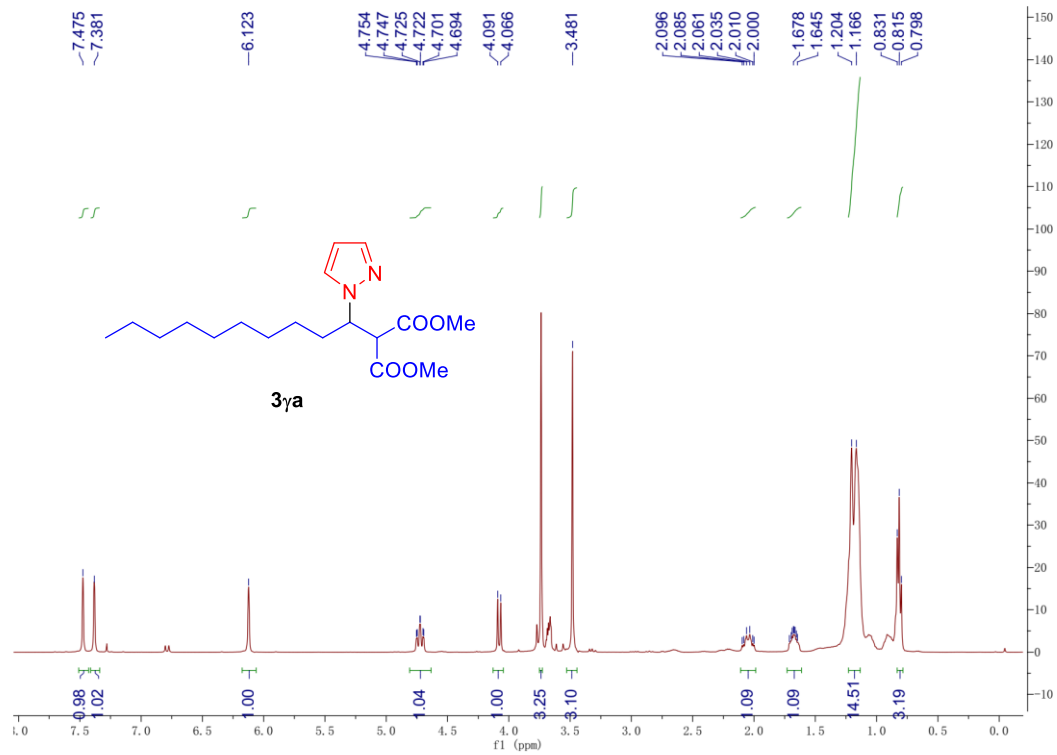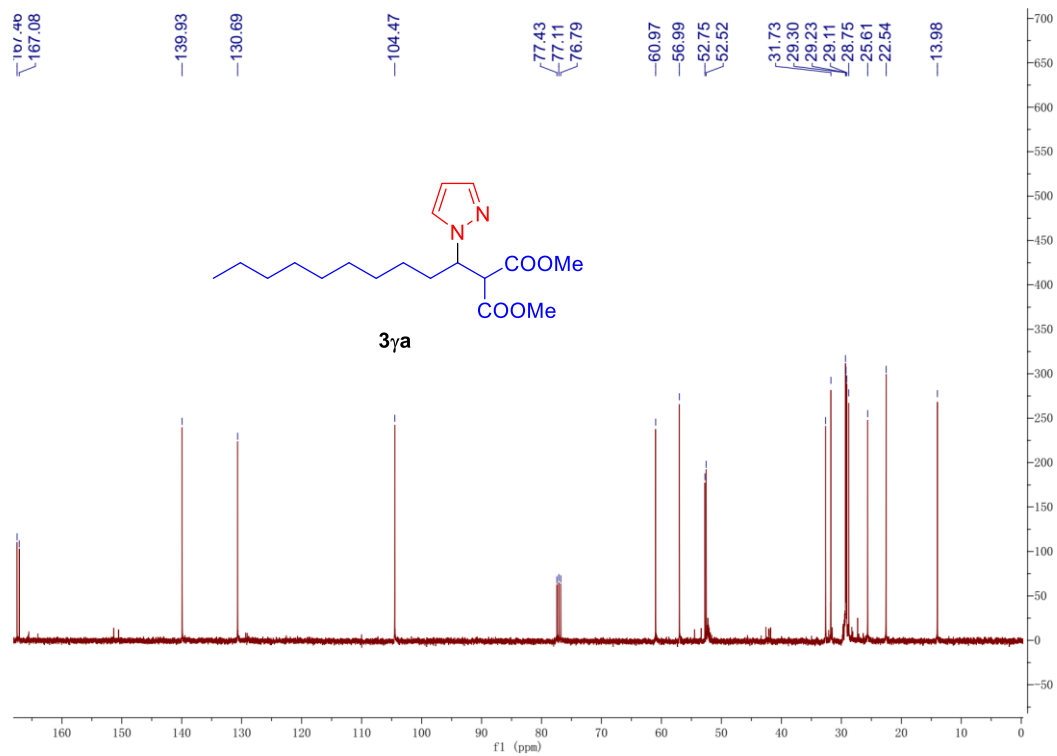

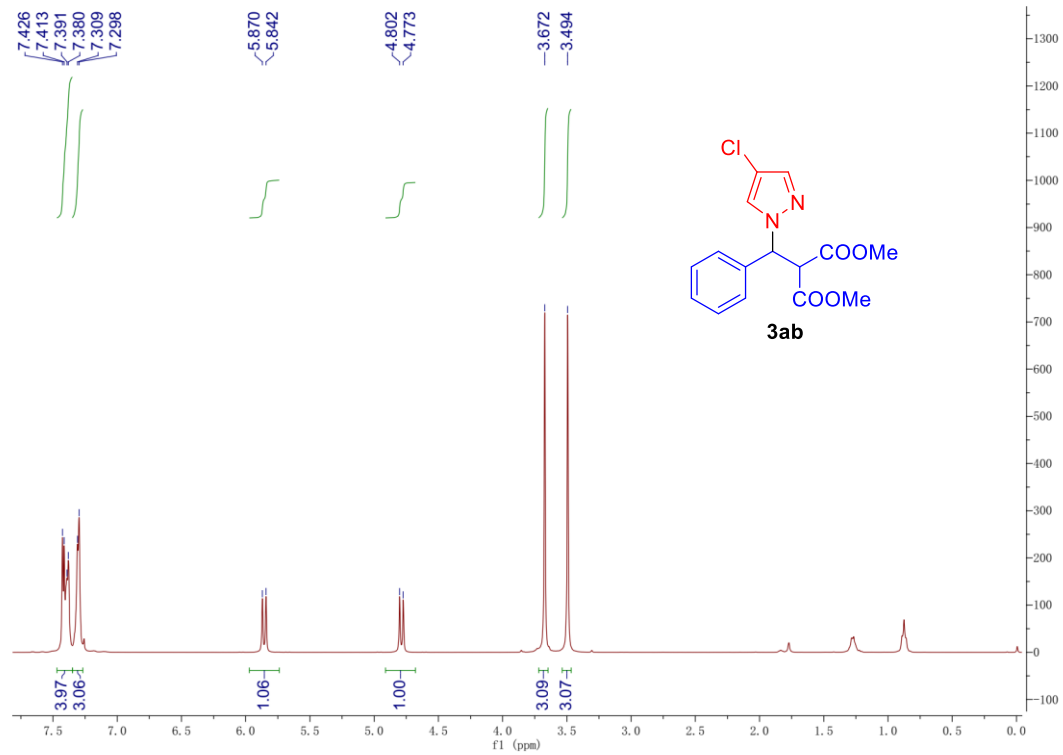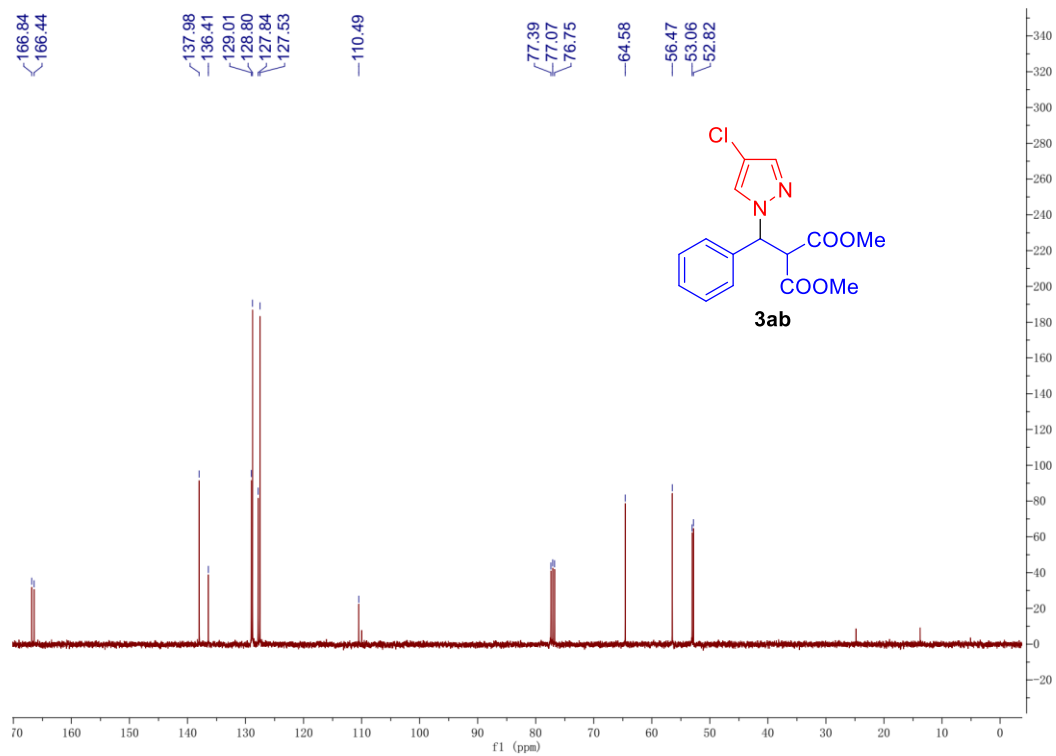

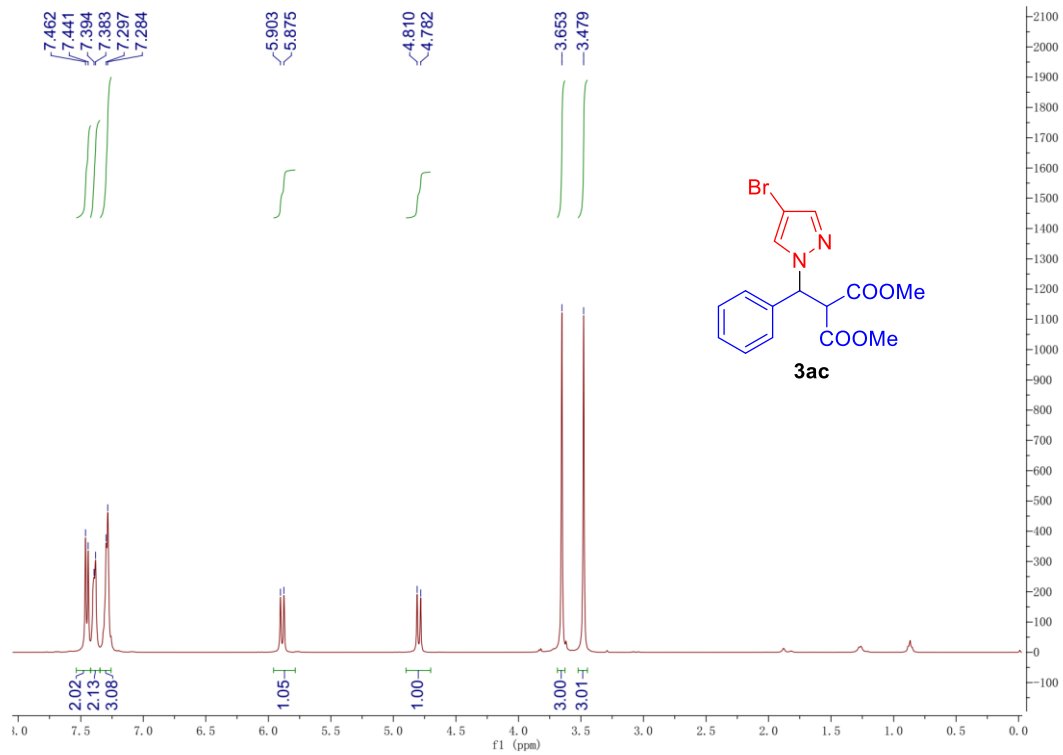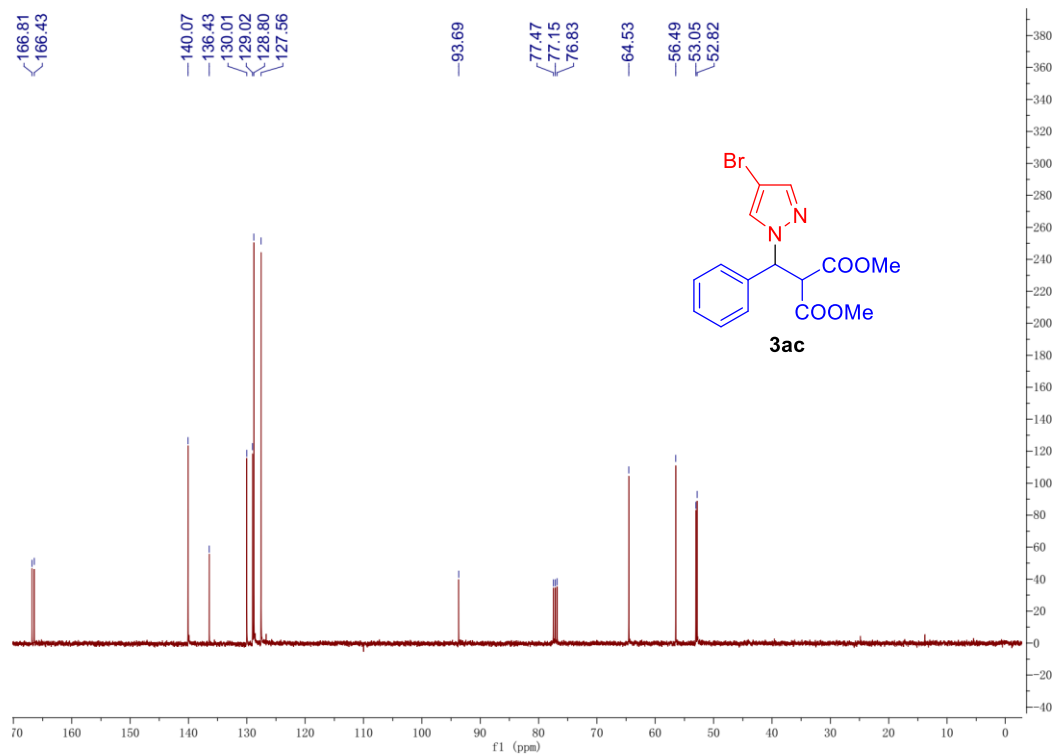

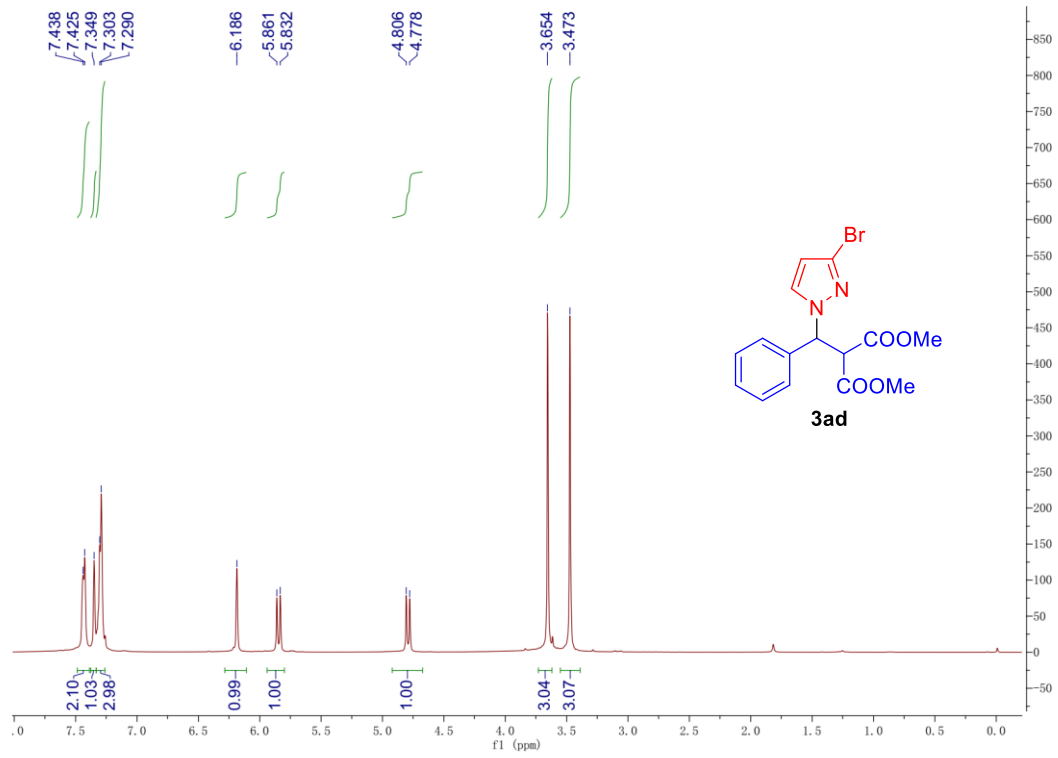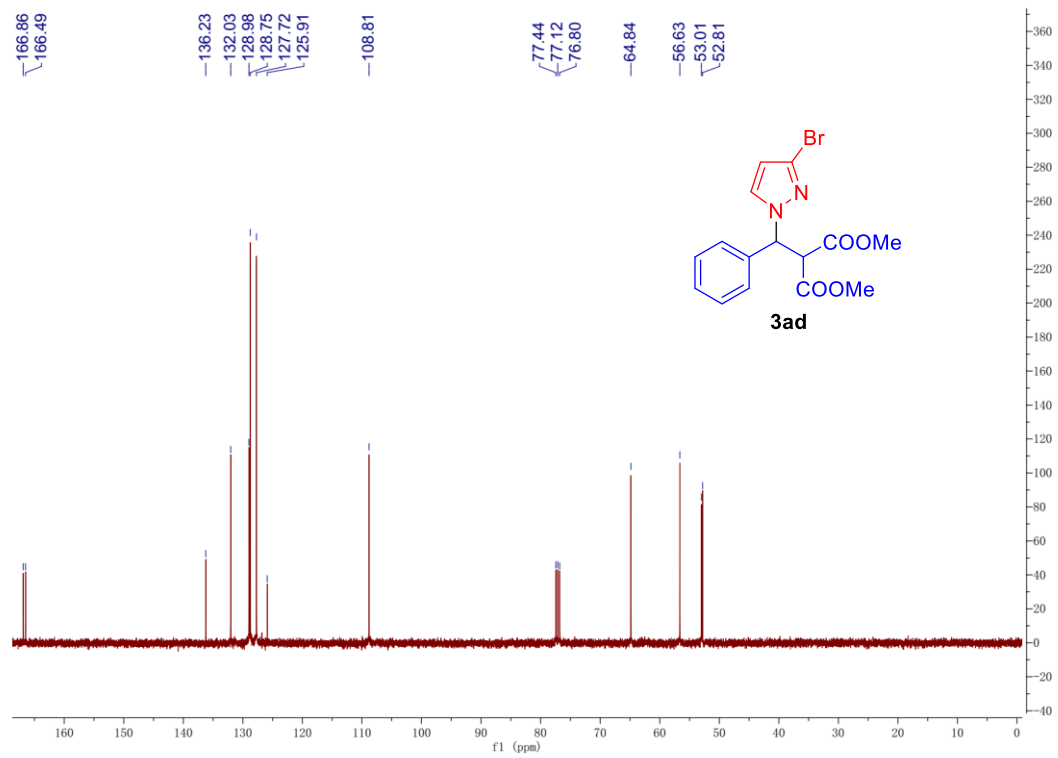

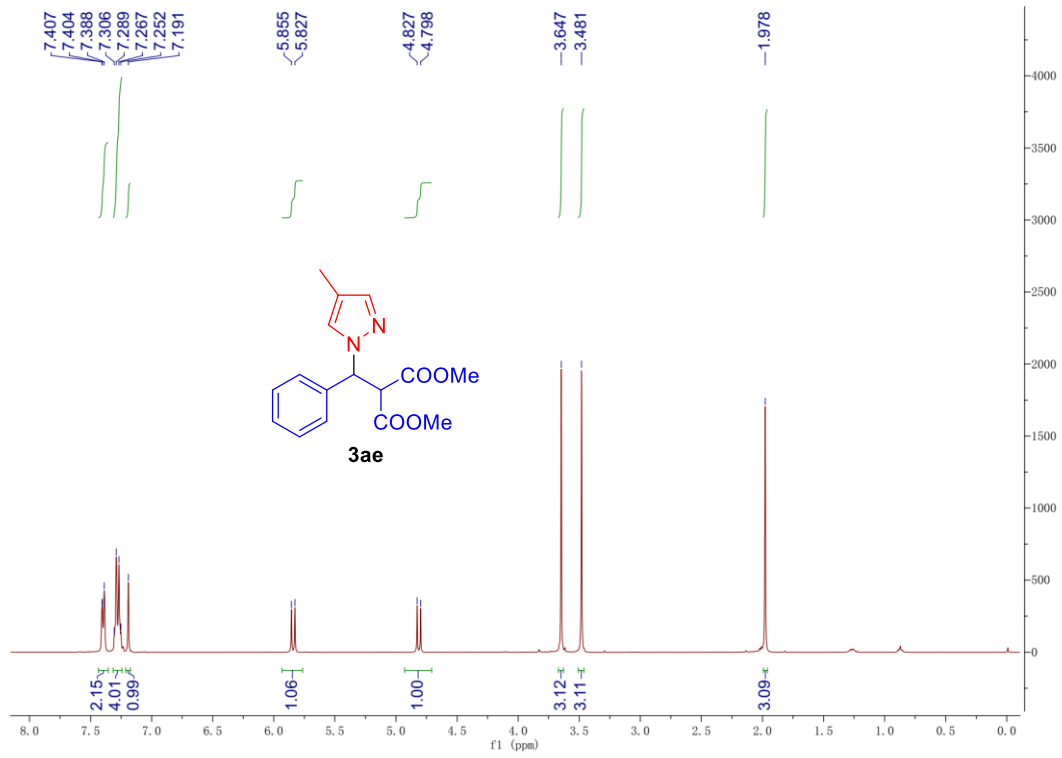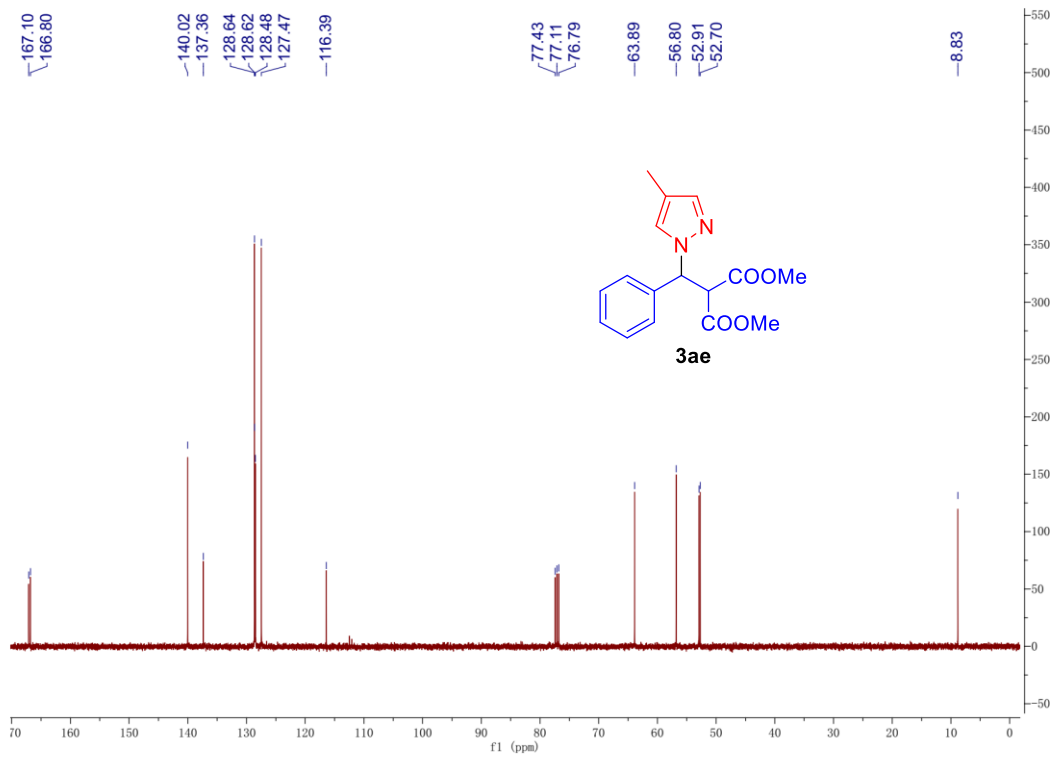

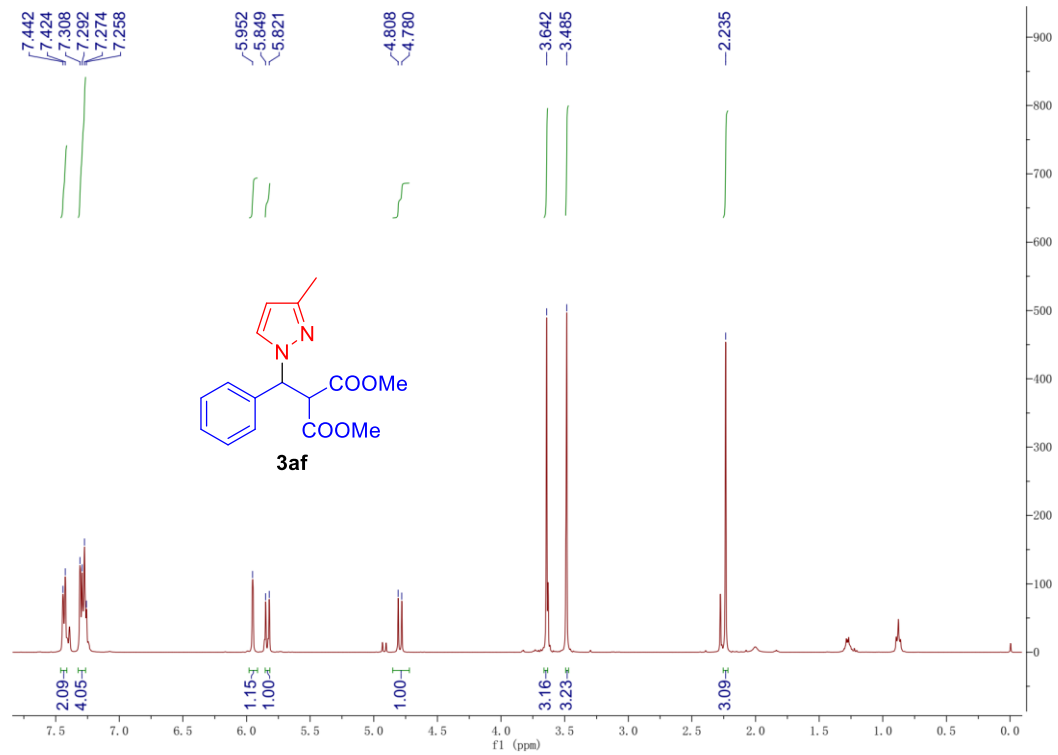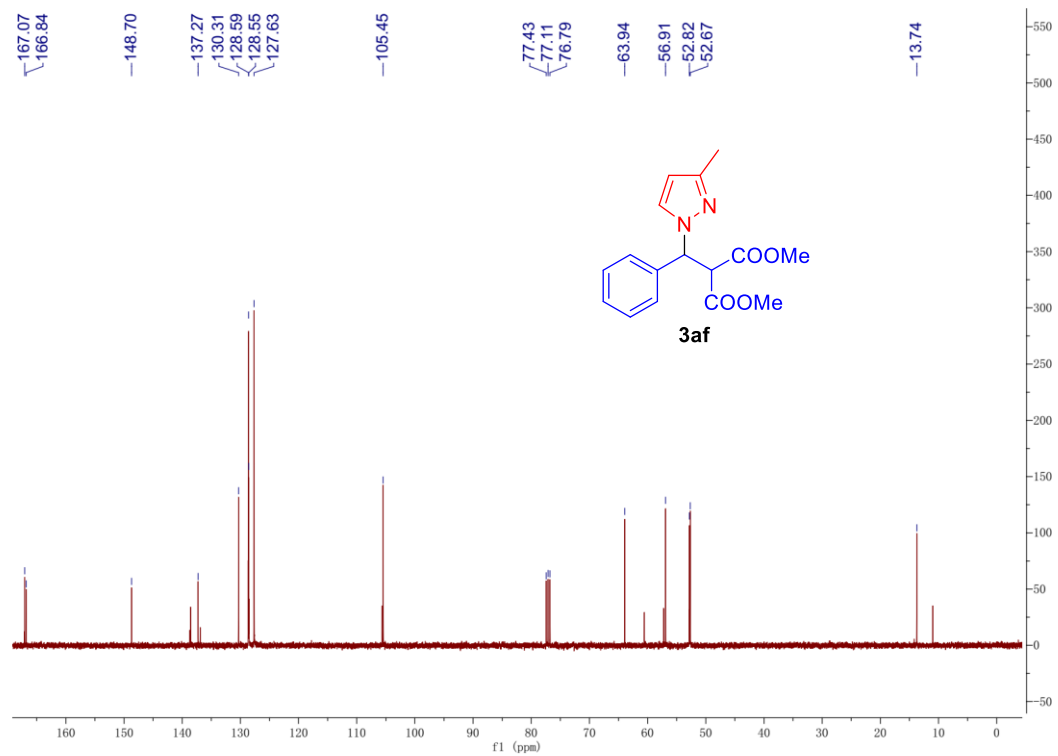



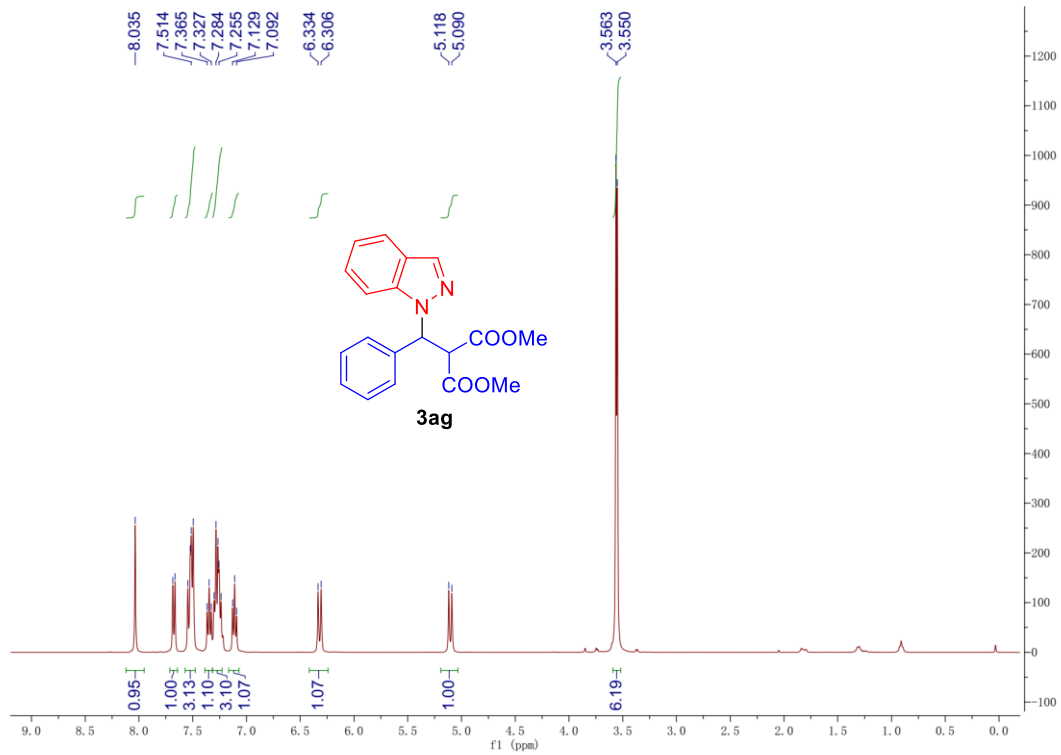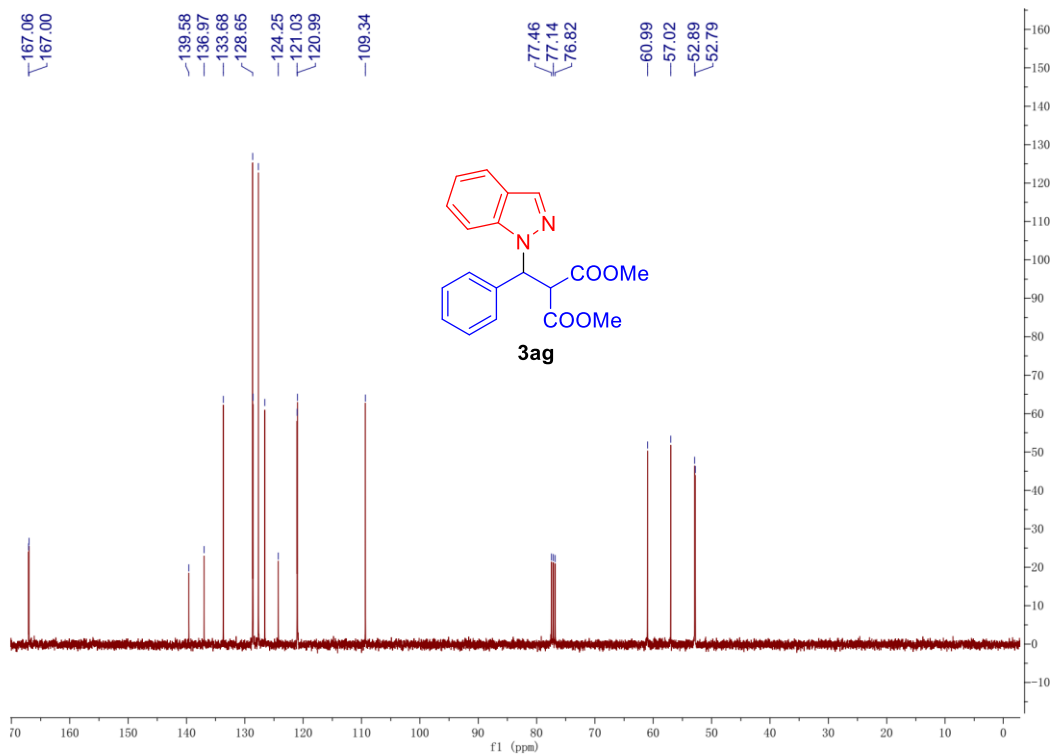

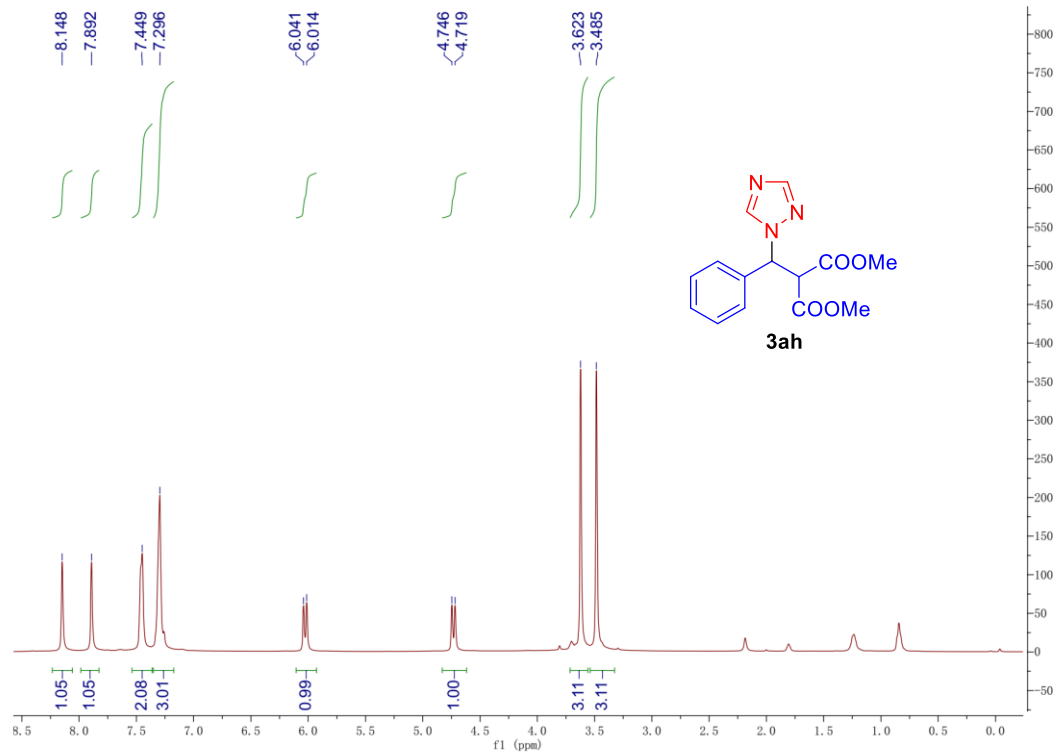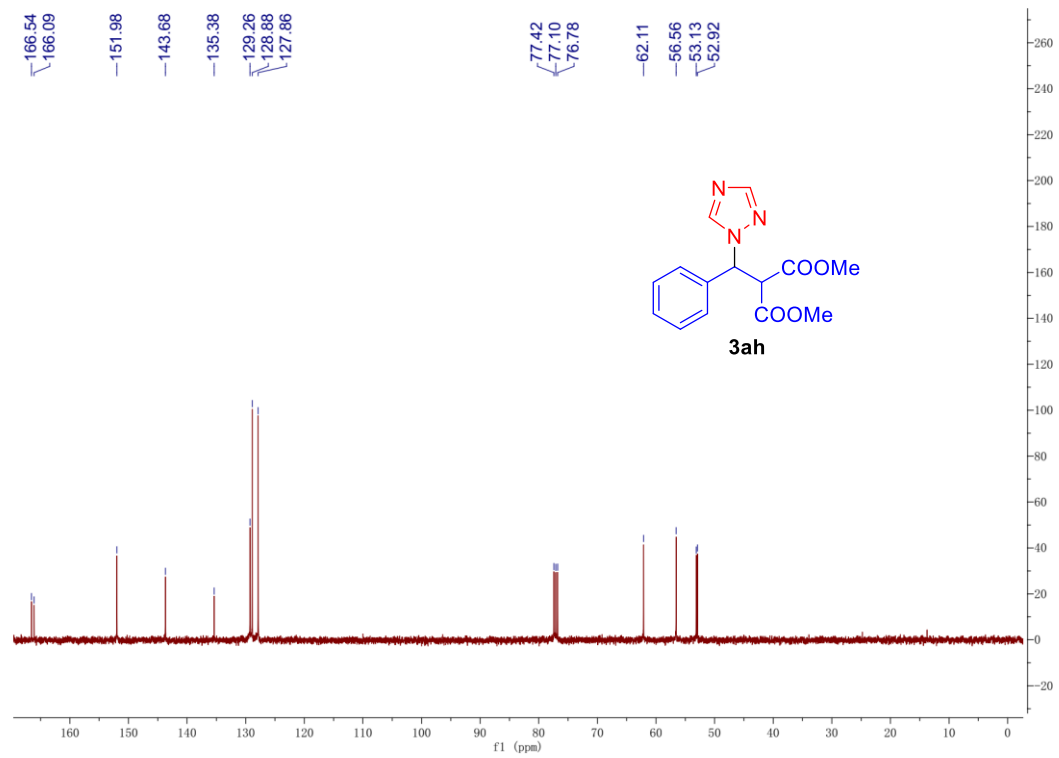

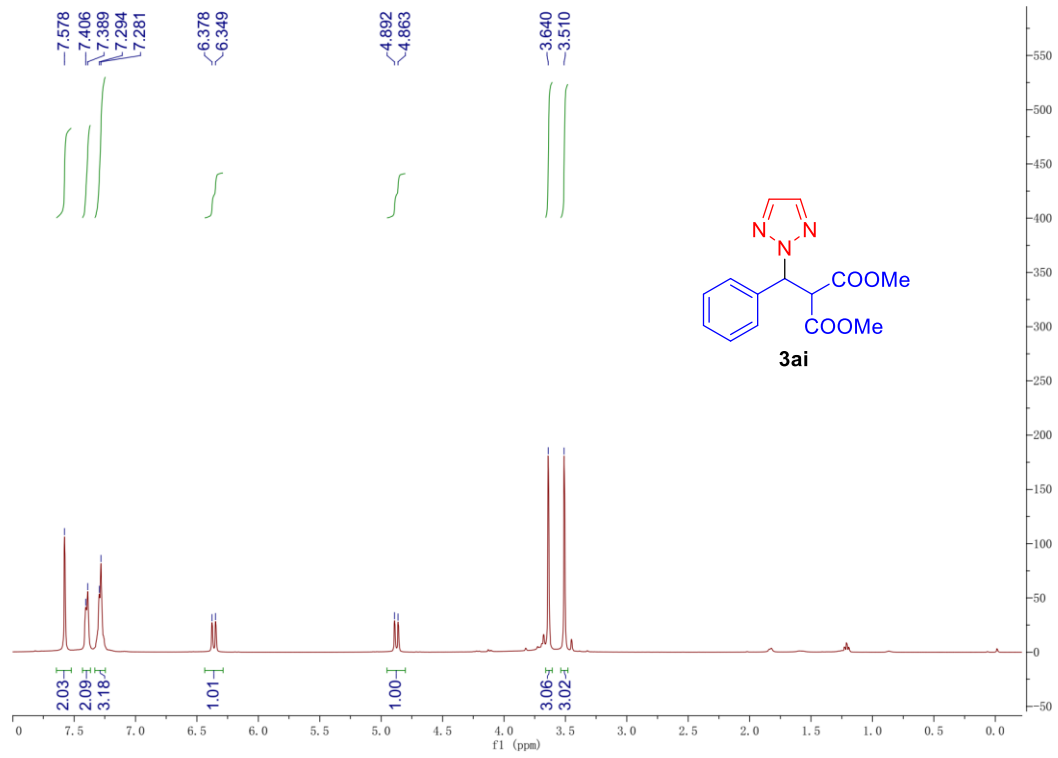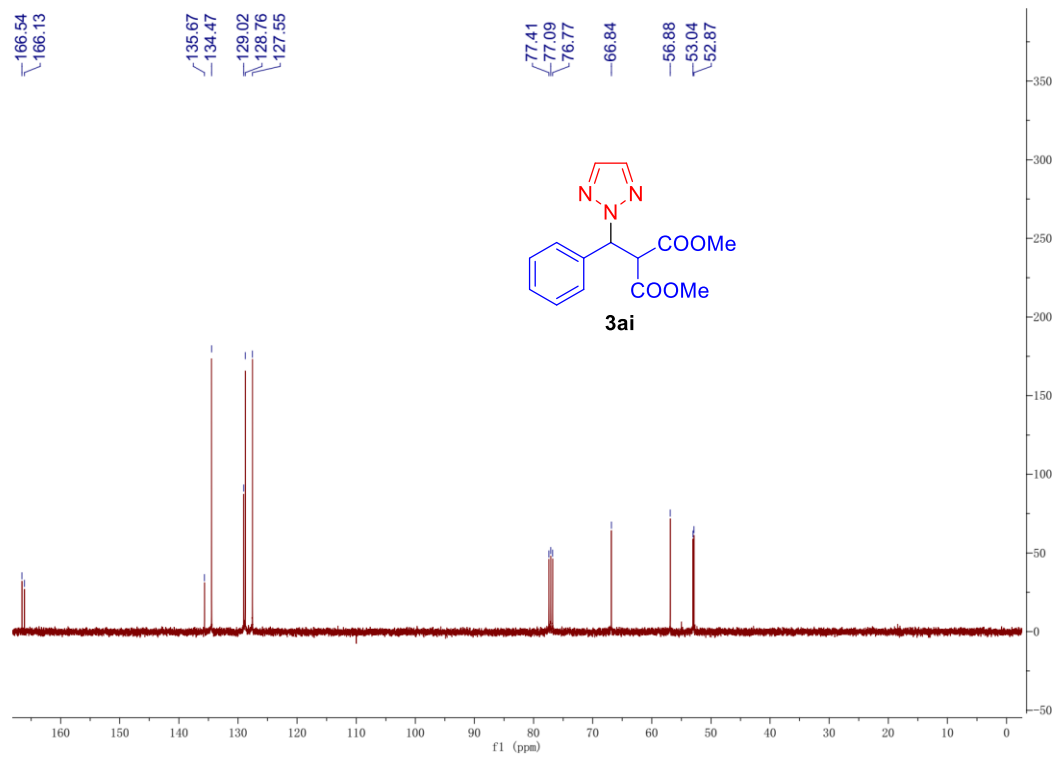

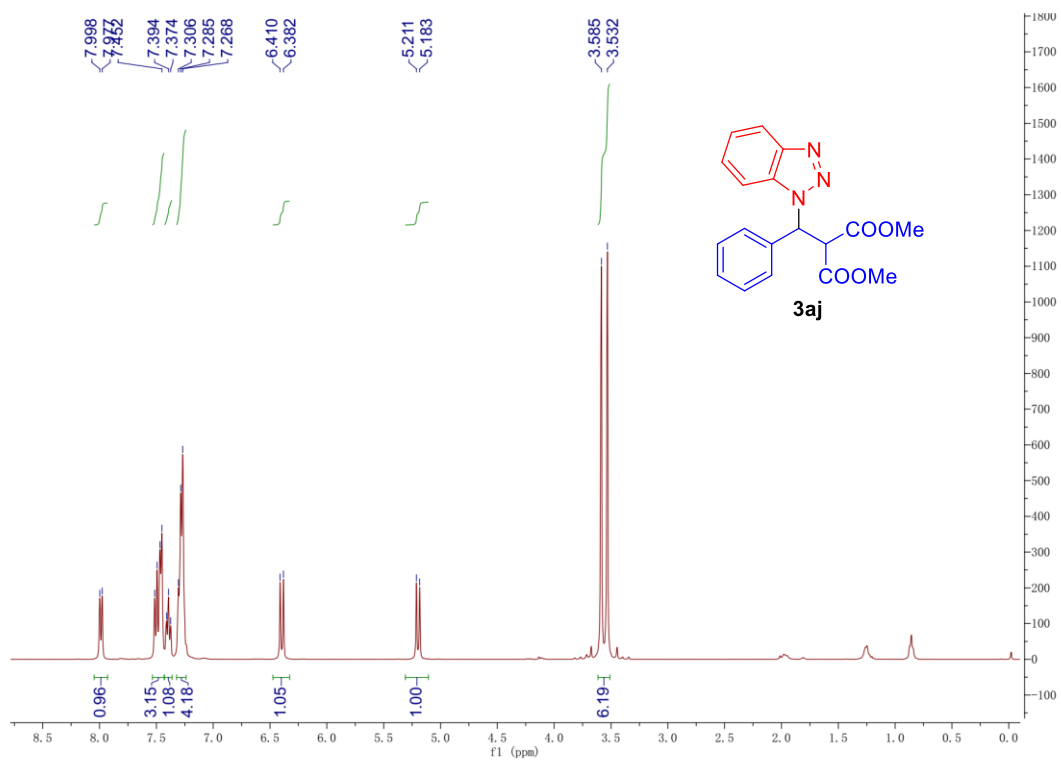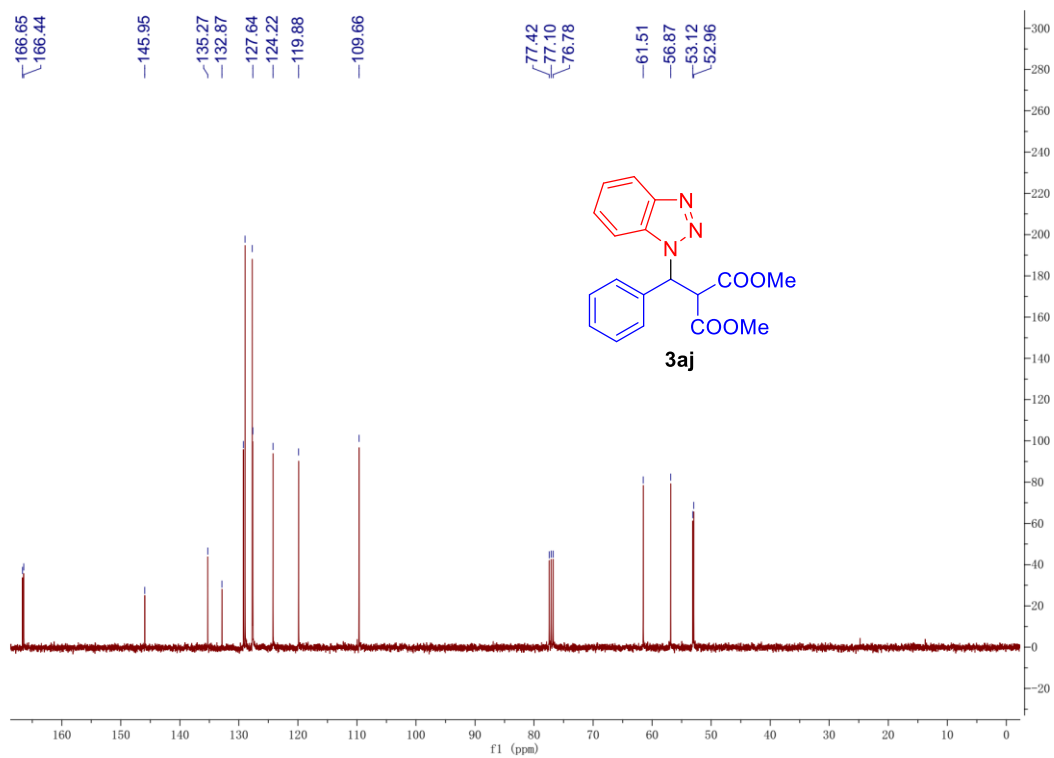

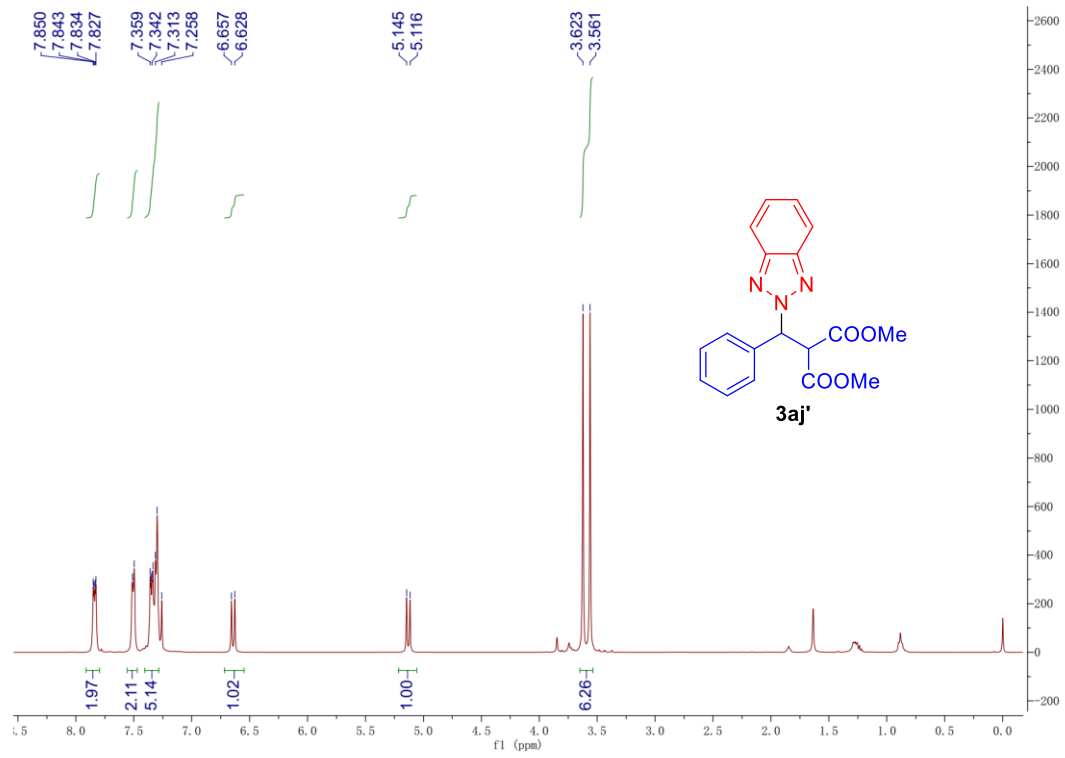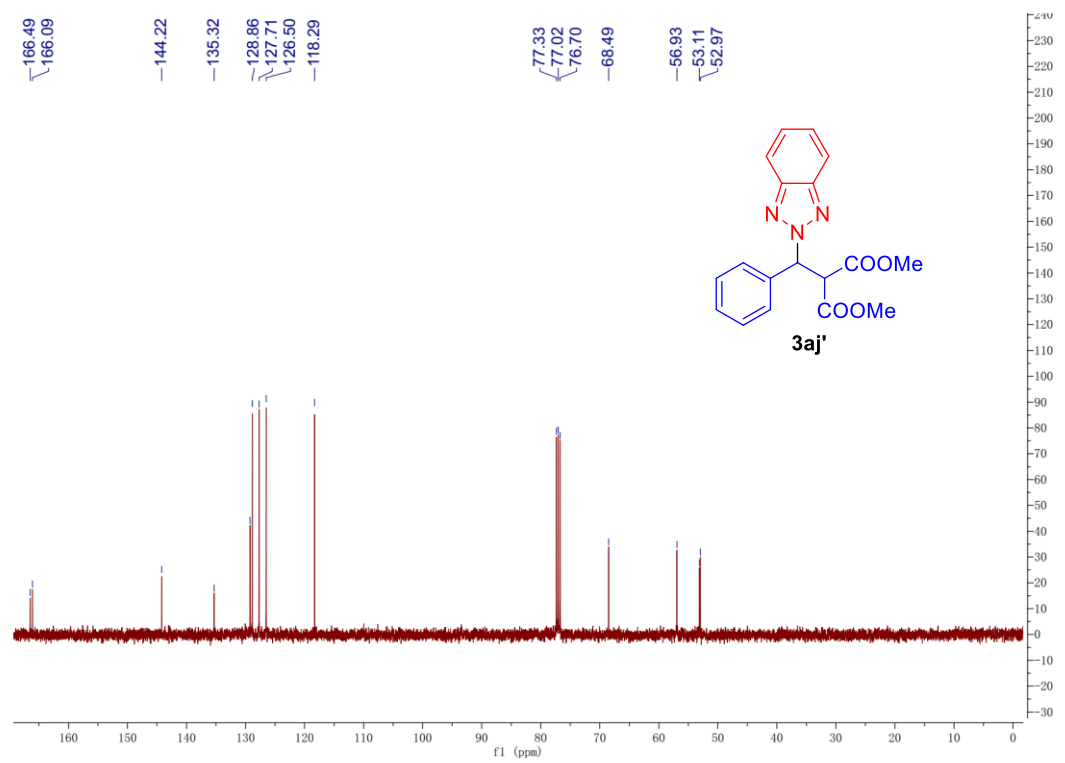

Supplement: d2ra02314h1.pdf [file d2ra02314h1.pdf]
